1 **Subscaling of a cytosolic RNA binding protein governs cell size**

2 **homeostasis in the multiple fission alga *Chlamydomonas***

3

4 Dianyì Liu<sup>1,2</sup>, Cristina Lopez-Paz<sup>1,3</sup>, Yubing Li<sup>1,4</sup>, Xiaohong Zhuang<sup>5</sup>, and James G. Umen<sup>1</sup>

5 1. Donald Danforth Plant Science Center, St. Louis, MO

6 2. University of Missouri - St. Louis, Cell and Molecular Biology Program, St. Louis. MO

7 3. Current address: GAT Biosciences, Parc Científic de Barcelona, Spain

8 4. Current address: FfAME, Alachua. FL

9 5. Centre for Cell & Developmental Biology and State Key Laboratory of Agrobiotechnology,

10 School of Life Sciences, The Chinese University of Hong Kong, Hong Kong, China

11

## 12 **Abstract**

13 Coordination of growth and division in eukaryotic cells is essential for populations of proliferating  
14 cells to maintain size homeostasis, but the underlying mechanisms that govern cell size have  
15 only been investigated in a few taxa. The green alga *Chlamydomonas reinhardtii*  
16 (*Chlamydomonas*) proliferates using a multiple fission cell cycle that involves a long G1 phase  
17 followed by a rapid series of successive S and M phases (S/M) that produces  $2^n$  daughter cells.  
18 Two control points show cell-size dependence: Commitment in mid-G1 phase requires  
19 attainment of a minimum size to enable at least one mitotic division during S/M, and the S/M  
20 control point where mother cell size governs cell division number (n), ensuring that daughter  
21 distributions are uniform. *tny1* mutants pass Commitment at a smaller size than wild type and  
22 undergo extra divisions during S/M phase to produce small daughters, indicating that TNY1  
23 functions to inhibit size-dependent cell cycle progression. *TNY1* encodes a cytosolic hnRNP A-  
24 related RNA binding protein and is produced once per cell cycle during S/M phase where it is  
25 apportioned to daughter cells, and then remains at constant absolute abundance as cells grow,  
26 a property known as subscaling (1). Altering the dosage of *TNY1* in heterozygous diploids or  
27 through overexpression increased Commitment cell size and daughter cell size, indicating that  
28 TNY1 is a limiting factor for both size control checkpoints. Epistasis placed *TNY1* function  
29 upstream of the retinoblastoma tumor suppressor complex (RBC) and one of its regulators,  
30 Cyclin-Dependent Kinase G1 (CDKG1) (2). Moreover, CDKG1 protein and mRNA were found to  
31 over-accumulate in *tny1* cells suggesting that CDKG1 may be a direct target of repression by  
32 TNY1. Our data expand the potential roles of subscaling proteins outside the nucleus and imply  
33 a control mechanism that ties TNY1 accumulation to pre-division mother cell size.

34

## 35 **Author Summary**

36 Size control is a fundamental property of cells which requires balancing cell growth with cell  
37 division, but the mechanisms used by cells to achieve this balance are only partly understood.  
38 The best-characterized mechanisms for size control to date involve fixed amounts of nuclear-  
39 DNA-bound inhibitory factors which repress cell division until cells grow past a minimum size  
40 threshold to overcome the inhibition. The unicellular green alga *Chlamydomonas* and many  
41 other algae and protists use a non-canonical cell cycle where cells can grow by many-fold in  
42 size before dividing, and then undergo multiple fission which involves successive rapid divisions  
43 to produce a uniform-sized population of daughters. In *Chlamydomonas* an unknown size  
44 homeostasis mechanism couples mother cell size to division number such that larger mother  
45 cells divide more times than smaller mother cells. Here, we identified and characterized a key  
46 factor governing size control in *Chlamydomonas*, a cytoplasmic RNA-binding protein and  
47 division inhibitor, TNY1, that is produced in a fixed amount in daughter cells and does not  
48 increase with cell growth, a property called sub-scaling. We found that TNY1 represses  
49 production of a cell cycle activator, CDKG1, during multiple fission to control daughter cell size.  
50 TNY1 is the first example of a cytosolic cell cycle inhibitor that does not depend on nuclear DNA  
51 binding to govern sub-scaling.

52

## 53 Introduction

54 Size homeostasis is a fundamental property of proliferating cells and is achieved through  
55 mechanisms that balance cell growth rates with cell division rates. However, how cells sense  
56 and control size remains unexplored in most eukaryotic lineages. Two mechanisms for size  
57 homeostasis have been previously described: Adder-type mechanisms where a fixed mass is  
58 added in each cell cycle independently of birth size, and sizer mechanisms where one or more  
59 cell cycle transitions is dependent on cells reaching a minimum size (3, 4). Sizers have been  
60 characterized in several eukaryotes including budding yeast, mammalian tissue culture cells,  
61 and *Arabidopsis* meristems (3, 4). In each case, a titration mechanism operates where a cell  
62 cycle inhibitor is produced at a fixed absolute amount per cell in each cell cycle, a property  
63 known as subscaling, while an activator accumulates as cells grow (3, 5). At their critical size,  
64 cells have accumulated enough activator to overcome the inhibitor and allow cell cycle  
65 progression. The details of which proteins acts as the inhibitor or the activator differ in each  
66 species, but there are some systems-level similarities in several taxa including G1-S control with  
67 a nuclear-localized and/or chromatin associated factor as the subscaling inhibitor (1, 6).  
68 Chromatin or nuclear DNA content is a naturally subscaled component of cells that has been  
69 exploited in *Arabidopsis* as a way of ensuring that the absolute amount of the inhibitor protein  
70 KRP4 apportioned to daughters is independent of birth size (7). In yeast and mammalian cells,  
71 chromatin-bound cell cycle inhibitor proteins, Whi5 and Rb respectively, are also subscaled and  
72 act as limiting inhibitors of cell cycle progression (8-10).

73 The unicellular green alga *Chlamydomonas reinhardtii* (*Chlamydomonas*) is a microbial model  
74 for plant cell cycles and for non-canonical multiple fission cell cycles that are used by many  
75 algae and other protists (11, 12). Multiple fission cell cycles partially uncouple cell growth and  
76 cell division: during a prolonged G1 phase, cells can grow more than ten-fold in size. Upon  
77 exiting G1, mother cells undergo (n) rapid alternating rounds of DNA synthesis and mitosis

78 (S/M) and produce  $2^n$  daughters within a common mother cell wall. Upon mitotic exit, the  
79 daughters hatch and enter either G0 or G1 phase due to nutrient availability (11, 13). The  
80 Chlamydomonas multiple fission cell cycle has two size control points or checkpoints. The  
81 Commitment point occurs in G1 phase, and is operationally defined by the transition from  
82 growth-dependence to growth-independence for completing at least one cycle of S/M. Cells  
83 must reach a minimum size to pass Commitment, and may continue to grow after Commitment  
84 for 5-7 hours, but this additional growth is optional for completing at least one cycle of S/M.  
85 Consequently, mother cells can begin S/M within a very large size range between two and  
86 twenty times the modal daughter size (11, 13). A second critical size checkpoint operates during  
87 the S/M phase and ensures that larger mother cells divide more times than smaller mother cells  
88 so that daughter sizes are in a uniform range regardless of the starting sizes of the mother cell  
89 population (11, 13). Thus, multiple fission incorporates a size control mechanism that is  
90 conceptually somewhat different than a simple gating mechanism used to control size in binary  
91 fission cell cycles.

92 Previous studies identified mutants that disrupted cell size homeostasis, including each subunit  
93 of the Chlamydomonas retinoblastoma tumor suppressor complex (RBC), MAT3/RBR, E2F1,  
94 and DP1 (14, 15). Interestingly, both Commitment size and the S/M size checkpoint were  
95 changed in these mutants (14, 15). Loss of function mutations in the *MAT3/RBR* gene caused  
96 cells to pass Commitment at a smaller size than wild type, and to divide too many times  
97 producing small daughters (14). In contrast, loss of function mutations in the *DP1* gene  
98 suppressed the *mat3/rbr* phenotype and caused cells to pass commitment at a larger size and  
99 to divide too few times leading to large daughters (15). Unlike the proposed model for size  
100 control in mammalian cells where the RB protein subscales (10), RBC subunits do not show this  
101 subscaling behavior in Chlamydomonas (16).

102 *cdkg1* was isolated in an insertional screen for size control defects. The mutant caused a large  
103 daughter cell phenotype and was found to act upstream of the RBC (2). CDKG1 encodes a D-

104 cyclin dependent kinase (CDK) that phosphorylates the MAT3/RBR subunit of the RBC and is a  
105 limiting factor in mitotic size control. While loss of the protein in *cdkg1* mutants caused too few  
106 divisions and large cells, over-production of CDKG1 caused extra divisions leading to smaller  
107 daughter cells (2). CDKG1 protein is synthesized just before S/M begins with larger mother cells  
108 producing a higher nuclear concentration of CDKG1 than smaller mother cells. Nuclear CDKG1  
109 concentration decreases with each round of cell division. Upon mitotic exit CDKG1 protein  
110 becomes undetectable and remains so until the S/M phase of the next cell cycle (2). It is  
111 unknown how *CDKG1* mRNA abundance and CDKG1 protein levels are modulated to control  
112 cell division number.

113 Here, we identified and characterized a Chlamydomonas heterogeneous nuclear  
114 ribonucleoprotein (hnRNP) related protein, TNY1, that acts as a cytosolic repressor in the size  
115 control pathway upstream of CDKG1 and the RBC. *tny1* mutants influenced Commitment and  
116 S/M size control and produced small daughters. TNY1 protein was produced once per cell cycle  
117 during S/M phase and apportioned to daughter cells where its absolute abundance stayed  
118 constant during G1 phase. Gene dosage alteration and over-expression experiments with *TNY1*  
119 both supported its role as a limiting regulator of mitotic size control. At least one key target of  
120 TNY1 repression is CDKG1, whose mRNA and protein abundance were negatively regulated by  
121 TNY1. TNY was found to be part of a ribonucleoprotein complex *in vivo*, and *in vitro* was able to  
122 bind the unusually long and uridine-rich 3' untranslated region of the *CDKG1* mRNA. TNY1 is a  
123 novel example of a non-nuclear subscaling inhibitor which governs size control.

124

## 125 **Results**

### 126 **TNY1 is a negative regulator of cell division upstream of** 127 **CDKG1.**

128 *tny1-1* mutants were discovered in a forward insertional mutagenesis screen using a  
129 paramomycin antibiotic selection marker (*paroR*) with direct screening for size defects of plate-  
130 grown gametes using a Coulter Counter. *tny1-1* gametes showed a small size phenotype  
131 (Figure 1A) and the mutant was re-tested under more controlled vegetative growth conditions to  
132 assess daughter cell size. Wild-type parental strain CC-124 and *tny1-1* cultures were  
133 synchronized under a diurnal cycle and daughter cell sizes were measured. *tny1-1* daughter  
134 cells had a modal cell size of  $\sim 50 \mu\text{m}^3$  compared with  $\sim 80 \mu\text{m}^3$  for wild-type daughters (Figure  
135 1B), with both strains passing Commitment and entering S/M with similar timing (Figure S1A),  
136 though with *tny1-1* populations always smaller than the control population when undergoing  
137 these two transitions (Figure S1B). The interval between Commitment and entering S/M was the  
138 same in wild type and *tny1-1* mutants, so the small size defects of *tny1-1* strains are not  
139 attributable to a shortened cell cycle duration (Figure S1A, B). We next generated populations of  
140 wild type and *tny1-1* mother cells and compared cell division numbers using a Commitment  
141 assay (Methods). When synchronized *tny1-1* and wild-type strains were sampled at the same  
142 time in late G1, division number profiles were similar (Figure S1C), despite the wild-type cells  
143 mother cells on average being 50-60% larger (Figure S1B); while in experiments where mother  
144 cell size distributions were matched between the two strains (modal size  $\sim 230 \mu\text{m}^3$ ), *tny1-1*  
145 mother cells underwent an average of 2.8 rounds of multiple fission versus 1.4 rounds for wild  
146 type (Figure S1D). Together, these data show that while the overall timing of cell cycle events is  
147 normal in *tny1-1* mutants, the minimum Commitment size and mitotic control of *tny1-1* cells are

148 both mis-regulated in a manner consistent with TNY1 acting as a negative regulator for size-  
149 dependent cell cycle control points.

150 We next used epistasis experiments to determine the dependency *tny1-1* phenotypes on other  
151 size regulators. CDKG1 functions upstream of the RBC and *cdkg1-2* null mutants cause a large-  
152 cell phenotype. *cdkg1-2 tny1-1* double mutants had identical sizes as *cdkg1-2* single mutants  
153 indicating that TNY1 functions upstream of CDKG1 and the RBC, and does not appear to  
154 control cell size homeostasis through an independent mechanism (Figure 1B, C). Note that  
155 Commitment sizes for *cdkg1-2* and *cdkg1-2 tny1-1* (~200  $\mu\text{m}^3$ ) are very similar to the  
156 Commitment size (~200  $\mu\text{m}^3$ ) of a wild type strain (Figure S1E, F), indicating that *cdkg1-2*  
157 suppresses both the Commitment and the S/M size defects of *tny1-1*.

158 The *tny1-1* strain was found to contain a single insertion of the *paroR* marker in the first exon of  
159 Cre07.g330300 (17) (Figure 1A). *tny1-1* was back-crossed to wild type CC-125 and random  
160 progeny were chosen and scored for gamete cell size, mating type, and paromomycin  
161 resistance. The *paroR* segregants were small, while the *paroS* segregants were wild-type size  
162 indicating linkage between the *paroR* insertion and the *tny1-1* phenotype (Methods, Figure  
163 S1G). Rescue of the *tny1-1* small cell defect was performed by transforming constructs that  
164 contained either a full-length genomic fragment of wildtype Cre07.g330300 (gTNY1) or a  
165 version with a C-terminal triple hemagglutinin epitope tag (gTNY-3xHA). In both cases, normal  
166 daughter cell size was restored in transformants while no rescue was observed in control  
167 transformants bearing an empty vector (Figure 1D, Figure S1H, I). Rescue efficiency with either  
168 of two constructs was somewhat low (~2%) but not atypical for *Chlamydomonas* rescues.

169 Immunoblotting of SDS-PAGE separated proteins from wild type, *tny1-1*, and rescued *tny1-1*  
170 strains using polyclonal antibodies raised against recombinant TNY1 protein or anti-HA  
171 antibodies detected proteins of the expected migration (~48 kDa) in wild type and rescued  
172 strains showing that TNY1 expression was restored in those rescued lines (Figure 1E).



173 Together these experiments confirm that disruption of Cre07.g330300 causes the *tny1-1*  
174 phenotype.

175

## 176 ***TNY1* is predicted to encode a putative hnRNP A-related RNA** 177 **binding protein.**

178 *TNY1* is predicted to encode a protein with two N-terminal RNA recognition motifs (RRMs) and  
179 a low complexity glycine-rich C-terminus (Figure 2A, Figure S2). This structure is found in  
180 eukaryotic heterogeneous nuclear ribonucleoproteins (hnRNPs) and other related RNA binding  
181 proteins that have diverse roles in nucleic acid regulation and metabolism, functioning as RNA  
182 or DNA binding proteins (18, 19). BLAST searching in different taxa was used to identify  
183 proteins related to *TNY1* in animals, plants, and algae. These sequences were curated and  
184 used to estimate a maximum likelihood phylogeny which placed *TNY1* in a clade of green algal  
185 *TNY1*-like homologs, and this *TNY1* clade was sister to a larger grouping of plant tandem RRM  
186 hnRNP-like proteins suggesting a common origin at the base of the Viridiaeplantae (Methods,  
187 Figure 2B). While *Chlamydomonas* encodes other hnRNP-like proteins, these grouped outside  
188 of the green algal *TNY1* clade which appears to extend to near the base of the crown  
189 chlorophytes (Chlorophyceae/Trebuxiophyciae/Ulvophyceae). No close matches to *TNY1* were  
190 found in predicted proteomes of earlier diverging Chlorophyte branches in the Prasinophyte  
191 grade including *Micromonas* and *Ostreococcus* which both have reduced genomes and may  
192 have lost the ancestral *TNY1*-related genes.

193

## 194 ***TNY1* is localized in the cytosol.**

195 To determine the subcellular localization of *TNY1*, a genomic *TNY1* construct with a C-terminal  
196 fusion of *mCherry* (20) was used to rescue *tny1-1* mutant cells and generate *gTNY1-*

197 *mCherry::tny1-1* strains with fusion protein expression confirmed by immunoblotting (Figure S3).  
198 Live cell confocal fluorescence microscopy revealed that TNY1-mCherry is detectable in the  
199 cytosol throughout the vegetative cell cycle with a weak but significant signal detected at all  
200 stages (Figure 3A). Indirect immunofluorescence using anti-HA antibodies targeting tagged  
201 TNY1-HA confirmed the cytosolic location and showed exclusion of TNY1 protein signal from  
202 the nucleus (Figure 3B).

203

## 204 **TNY1 regulation and subscaling throughout the cell cycle.**

205 To determine the accumulation pattern of *TNY1* mRNA during the cell cycle wild-type cultures  
206 were synchronized under a standard diurnal cycle (12hr:12hr light:dark) and RNA samples were  
207 prepared from cells at different time points and used for quantitative RT-PCR. *TNY1* mRNA was  
208 present at very low levels during G1 phase and rose sharply to a peak toward the middle/end of  
209 S/M phase, and then declined slowly in the dark phase after division (Figure 4A top panel). This  
210 experiment largely reproduced the results of (21) and (22), where the timing of *TNY1* mRNA  
211 accumulation coincided with that of many late mitotic and cilia-related genes.

212 The trigger for *TNY1* mRNA accumulation is likely to be cell division, but we could not rule out  
213 diurnal control or the light-to-dark transition as the drivers of *TNY1* expression. To distinguish  
214 these possibilities we used two alternative diurnal regimes where peak S/M phase (12-14 hrs  
215 ZT) did not coincide with the light-to-dark transition (early dark regime - 15hr:9hr light:dark;  
216 extended light regime - 9hr:15hr light:dark). In both alternative regimes, *TNY1* mRNA peaked  
217 with S/M phase and was not significantly shifted by the timing of the light-dark transition (Figure  
218 4A).

219 *TNY1* mRNA declines gradually after S/M and becomes almost undetectable after the beginning  
220 of the light period. To further determine if *TNY1* mRNA turnover was facilitated by light, RNA  
221 samples were collected under a shortened dark cycle, where cells were first synchronized under

222 a standard 12hr:12hr light:dark regime, and then in the final cycle the length of the dark period  
223 was shortened to 3 hrs or 9 hrs, or lengthened to 15 hrs. When the light phase began early,  
224 *TNY1* mRNA disappearance was accelerated, while when the dark period was lengthened,  
225 *TNY1* mRNA persisted longer (Figure 4B, S4A). We conclude that some combination of light  
226 and/or cell growth promotes the reduction of *TNY1* mRNA through either accelerated mRNA  
227 turnover or decreased transcription.

228 The accumulation pattern of TNY1 protein throughout the cell cycle was determined in a wild-  
229 type culture synchronized under the standard 12hr:12hr light:dark diurnal cycle. Whole cell  
230 protein lysates were prepared from cells collected at different time points, fractionated by SDS-  
231 PAGE and probed for TNY1 protein on immunoblots that were also in parallel probed with  
232 histone H3 antibodies for cell number normalization. Two blots were prepared with different  
233 protein loading regimes on their respective gels. The first blot was made using equal numbers of  
234 cells loaded per lane to determine the absolute amount of TNY1 protein per cell (Figure 4C,  
235 S4B). During the G1 phase, cells increased in size by an average of eight-fold in size, but the  
236 absolute amount of TNY1 per cell remained relatively constant, and the signal only increased  
237 during S/M when mother cells began dividing. The other blot was from a gel loaded with equal  
238 amounts of total biomass per lane to determine the TNY1 concentration per cell (Figure 4D,  
239 S4C). Consistent with the first gel, the concentration of TNY1 per cell steadily dropped during  
240 G1 phase, as cells enlarged but no additional TNY1 was produced. In summary, cells are born  
241 with a fixed amount of TNY1 protein that is steadily diluted during G1 phase as cells grow,  
242 reaching its minimum concentration just prior to S/M during which its mRNA is transcribed and  
243 the protein is replenished in new daughters (Figure 4E).

244 We next determined how *TNY1* production scaled with mother cell size during S/M phase.  
245 Under the three regimes in Figure 4A, where mother cell size was increased or decreased  
246 based on time in light before division, the peak levels of *TNY1* mRNA increased or decreased  
247 compared with the standard condition in larger or smaller mother cells, respectively, suggesting

248 that mother cell size or numbers of daughter nuclei may control *TNY1* mRNA production (Figure  
249 4F, S4D, E). To determine if the subscaling of *TNY1* is controlled by any feedback from size  
250 control regulators, we examined its levels in cell size mutants. *TNY1* protein levels were  
251 determined in daughters produced from wild type, *mat3-4*, *dp1-1* and *cdkg1-2*. Interestingly,  
252 different sized daughter cells contained the same amount of *TNY1* on a per cell basis (Figure  
253 4G). Therefore, *TNY1* production in each cell cycle is governed independently of the mitotic size  
254 control pathway, and its levels may instead be controlled by limiting factors that scale invariantly  
255 with cell size such as genomic template for *TNY1* transcription.

256

## 257 ***TNY1* is limiting for size control.**

258 Size regulators that exhibit subscaling behavior are predicted to be dosage sensitive (23) (1, 6).  
259 To determine whether *TNY1* gene dosage might be limiting for size control, a set of isogenic  
260 diploid strains was constructed with genotypes *TNY1/TNY1*, *TNY1/tny1-1*, and *tny1-1/tny1-1*  
261 (Methods). Size profiles of daughters from synchronized diploid cultures of each strain were  
262 determined and compared to each other and to haploid strains. Daughters from the two  
263 homozygous strains were approximately twice the size of haploid daughters of the same  
264 genotype, while the heterozygous *TNY1/tny1-1* daughters were intermediate in size between  
265 the homozygous mutant and wild-type diploid strains (Figure 5A) and expressed less *TNY1*  
266 protein than *TNY1/TNY1* diploids (Figure 5B). Further supporting the dosage sensitivity of  
267 *TNY1*, we found that among the meiotic progeny of *tny1-1::TNY1* (or *tny1-1::TNY1-HA*) rescued  
268 strains backcrossed to a wild-type parental strain, those that inherited both the wild type *TNY1*  
269 allele and the *TNY1* transgene were larger than those that inherited only the wild type *TNY1*  
270 allele or those that had the parental genotype of *tny1-1* with a *TNY1* rescuing construct (Figure  
271 S5A, B).

272 Besides altering gene dosage, we also generated a *TNY1* transgene driven by a previously  
273 characterized constitutive promoter/terminator from *Chlamydomonas RPL23* gene (24). This  
274 *RPL23:gTNY1::RPL23* construct was transformed into a *tny1-1* strain and transformants were  
275 tested for size phenotypes along with control transformants that received an empty vector with a  
276 selectable *aph7* marker conferring hygromycin resistance (25). Among independent  
277 *RPL23:gTNY1::tny1-1* transformants, ~ 80% were rescued and were close to wild-type in mode  
278 size ~ 80  $\mu\text{m}^3$  (Figure S5C), while ~ 20% showed a large-cell phenotype with a modal cell size >  
279 100  $\mu\text{m}^3$  that was never observed in rescue experiments using constructs with the controls  
280 (Figure 5C, Figure S5D). Large-sized *RPL23:gTNY1::tny1-1* populations are always larger than  
281 the wild type strain throughout G1 (Figure S5E), while passing Commitment and entering S/M  
282 with similar timing as wild type and small-sized *tny1-1* mutants (Figure S5F). Taken together,  
283 these data indicate that dosage and expression level of TNY1 impact mitotic cell size control  
284 and are consistent with the subscaling behavior observed for TNY1 expression being an  
285 important contributor to size-dependent cell cycle control.

286

## 287 **TNY1 inhibits the accumulation of CDKG1 protein in post-** 288 **mitotic cells.**

289 Previous work showed that mRNA and protein for the cell cycle activator CDKG1 are  
290 synthesized in a burst just before S/M phase and that CDKG1 protein is eliminated when cells  
291 exit S/M (2). Here we found that the negative regulator TNY1 functions genetically upstream of  
292 CDKG1 and that *TNY1* mRNA is upregulated during S/M, after *CDKG1* mRNA and protein are  
293 already present. These observations suggested a possible antagonistic relationship between  
294 TNY1 and CDKG1 in size control where TNY1 might limit production of CDKG1 or other cell  
295 cycle regulators during or after S/M phase. To test the effect of TNY1 on CDKG1 expression,  
296 wild-type and *tny1-1* strains were synchronized and *CDKG1* mRNA levels were measured in

297 post-mitotic cells. Previously it was found that *CDKG1* mRNA and CDKG1 protein super-scale  
298 with mother cell size (2). In this experiment more *CDKG1* message was detected in *tny1-1* than  
299 in wild type, even though comparing the pre-division populations, *tny1-1* cells were smaller than  
300 wild type (Figure 6A). Since TNY1 is cytosolic, TNY1 is most likely to affect *CDKG1* mRNA  
301 levels by impacting message stability, though this finding does not rule out a possible role for  
302 TNY1 in translational control of CDKG1.

303 To test the impact of TNY1 on CDKG1 protein abundance, *tny1-1* was crossed into a rescued  
304 *cdkg1* strain expressing an HA epitope tagged allele *HA-CDGK1* (2), so that CDKG1 protein  
305 levels could be assessed in a *tny1-1* strain background. CDKG1 content per cell was examined  
306 in protein samples from both mitotic cells and post-mitotic cells. *tny1-1* cells are smaller than  
307 wild type but showed higher levels of CDKG1 protein in mitotic and post-mitotic cells (Figure  
308 6B). In addition, indirect immunofluorescence was used to detect HA-CDKG1 in mitotic and  
309 post-mitotic cells, where a clear HA-CDKG1 signal was present in nuclei of *tny1-1* daughters but  
310 not in the *TNY1* control strain (Figure 6C) (2). Together these data show that TNY1 limits the  
311 accumulation of both *CDKG1* mRNA and CDKG1 protein.

312

### 313 **TNY1 is part of an RNP complex and can bind to the 3'UTR of** 314 ***CDKG1* mRNA.**

315 The finding that cytosolic TNY1 could inhibit accumulation of nuclear-localized CDKG1 protein  
316 suggests a mechanism which might involve direct interaction of TNY1 with *CDKG1* mRNA. We  
317 first used native electrophoresis of whole cell extracts, and immunoblotting to determine if TNY1  
318 might be part of a ribonucleoprotein complex (RNP). On native gels, TNY1 migrated near the  
319 158 kDa marker which is slower than would be expected for free TNY1 (> 450 kDa). TNY1  
320 migration was unchanged when extracts were pre-treated with DNase, but when extracts were  
321 treated with micrococcal nuclease which digests both DNA and RNA, or by increasing amounts

322 of RNase, the TNY1 signal shifted to a slower moving complex migrating near the 450 kDa  
323 marker. These results suggest that TNY1 is associated with RNA *in vivo* as an RNP, and that  
324 the RNA component may contribute significantly to the negative charge state of the complex  
325 and impacting its migration rate on native gels (Figure 7A).

326 A simple model for regulation of CDKG1 by TNY1 is direct binding of TNY1 to the *CDKG1*  
327 mRNA which has an unusually long (1.7kb) and uridine-rich (27% U versus 19% average for  
328 *Chlamydomonas* genes) 3' UTR (26)— both rare features in *Chlamydomonas* mRNAs that tend  
329 to have shorter 3' UTRs and overall GC-rich nucleotide composition. We attempted to detect  
330 TNY1 binding to *CDKG1* mRNA *in vivo* using RNA crosslinking and immunoprecipitation (RIP)  
331 (27) but were unable to amplify an enriched signal due to high background. Instead, we  
332 developed an *in vitro* assay where radiolabeled *CDKG1* mRNA fragments were used as a probe  
333 for binding to GST-TNY1 fusion protein or GST immobilized on a membrane (Methods) (28).  
334 Radiolabeled *CDKG1* mRNA was synthesized in two fragments, with the 5' region including the  
335 5'UTR and CDS in one fragment, and the 3' UTR in a second fragment. After incubation of  
336 radiolabeled RNA with membrane-bound GST1-TNY1 or GST1 and washing, the signal was  
337 detected only for the 3' UTR fragment binding to GST1-TNY1 (Figure 7B). These data indicated  
338 that TNY1 protein can bind RNA with sequence specificity, including sequences in the 3' UTR of  
339 its likely target gene *CDKG1*.

340

## 341 Discussion

342 In this study we identified a new *Chlamydomonas* sizer protein, TNY1, a hnRNP-related  
343 cytosolic RNA binding protein which functions as a negative regulator of cell size in a dosage-  
344 dependent manner. As with other size mutants in *Chlamydomonas*, *tny1-1* mutant cells retain  
345 relatively normal cell cycle progression kinetics, but do so with altered cell size setpoints for  
346 Commitment and for division number during S/M. *TNY1* mRNA and TNY1 protein are

347 synthesized once per cell cycle during S/M phase, and TNY1 protein is at its highest  
348 concentration in newborn daughters. During G1 phase TNY1 absolute abundance remains  
349 constant, meaning that its cellular concentration drops as cells grow. This subscaling behavior  
350 appears to be important for size homeostasis since increased or decreased TNY1 dosage or  
351 expression impacts mitotic size control. The cell cycle activator and size regulator CDKG1, a D-  
352 cyclin dependent RBR kinase is a likely direct target of TNY1 repression since ectopic  
353 accumulation of CDKG1 protein and mRNA was observed in *tny1-1* mutants, and TNY1 protein  
354 could interact specifically with the 3'UTR of the *CDKG1* mRNA, possibly as a translational  
355 repressor or destabilizing factor.

356 Together these data suggest a model where TNY1 controls cell division by modulating the  
357 accumulation of a limiting activator protein, CDKG1, and possibly other limiting cell cycle  
358 regulators (Figure 8). This modulation might occur in at least two ways. During G1 phase,  
359 CDKG1 is not detectable and does not seem to play a normal role in cells passing Commitment,  
360 but in a *tny1-1* mutant its inappropriate expression in G1 phase could change the Commitment  
361 threshold size by contributing to the premature inactivation of the RBC which controls  
362 Commitment cell size (15, 16). Just prior to S/M phase, the absence of TNY1 may cause the  
363 production of extra CDKG1 leading to increased division number during S/M, or it may cause  
364 extra divisions by preventing the timely removal of CDKG1 which normally accompanies mitotic  
365 exit (Figure 8B). *In vivo* binding studies to determine the timing of when TNY1 associates with  
366 *CDGK1* mRNA, and to identify other direct RNA targets of TNY1 will be useful for testing the  
367 direct repression model for cell size control.

368 Evidence for cell size checkpoints based on some form of protein subscaling has been found in  
369 different eukaryotic taxa, including fungi, animal cells and plant meristems (Figure S6) (7, 8, 10,  
370 29). An appealing property of subscaled proteins is that their absolute abundance in a cell can  
371 act as a denominator for perceiving changes in cell size whose proxy is a protein or other  
372 molecule whose cytoplasmic concentration is constant. Interestingly, in the above examples



373 subscaling could be directly tied to nuclear function via DNA or chromatin (6). In budding yeast,  
374 nuclear Whi5 protein binds to and inhibits the DNA bound transcription factor SBF, a key  
375 activator of S phase transcription. While some regulation of Whi5 abundance may occur based  
376 on synthesis of Whi5, it is also limited by chromatin binding (8, 29, 30). Similar findings were  
377 made for the RB protein in mammalian cells which is a functional analog of Whi5 for S phase  
378 transcription (10). In plants, chromatin binding by the CDK inhibitor KRP4 coupled with  
379 elimination of excess unbound KRP4 allows daughter cells to be apportioned with a fixed  
380 amount of KRP4 that acts as a concentration dependent inhibitor of the cell cycle in the  
381 subsequent G1 phase and ensures that S phase entry occurs at a constant average cell size  
382 regardless of daughter cell sizes (7). Here we found that subscaling can also occur for a  
383 cytosolic protein, TNY1, that has no direct connection to the nucleus or chromatin. This finding  
384 raises the question of how TNY1 synthesis is controlled and how its levels can be modulated so  
385 that daughters always contain the same amount of TNY1. One way to achieve a fixed dose of  
386 TNY1 per cell would be if production of *TNY1* mRNA is limited by *TNY1* gene copy number in  
387 daughters and not influenced by cell size related factors (e.g. transcription factor abundance,  
388 co-activator abundance) (23), but this remains to be determined. Supporting this idea, TNY1  
389 absolute abundance in daughters was not influenced by cell size mutants that caused  
390 production of large or small daughters. To date, TNY1 is the only cell cycle regulatory protein in  
391 *Chlamydomonas* known to subscale. The RB complex is downstream of TNY1 in  
392 *Chlamydomonas*, but MAT3/RBR increases in abundance during G1 phase (2, 16) and does not  
393 show dosage sensitivity for size control as its mammalian homolog RB and its yeast counterpart  
394 Whi5 do. Thus, the systems-level target for subscaling of size control is not conserved between  
395 algae and these two members of the opisthokont phylum.  
396 Interestingly, TNY1 shares some similarity to budding yeast Whi3, an RNA binding protein and  
397 negative cell cycle regulator that functions in part by restricting expression of the limiting G1  
398 cyclin Cln3 (31, 32). In budding yeast, Whi3 represses the function of Cdc28-Cln3 by retaining

399 Cdc28-Cln3 complexes in the cytoplasm in G1 phase (33). Whi3 does not impact the  
400 abundance of Cdc28 but does represses *CLN3* mRNA abundance and translational efficiency  
401 (34). In *Chlamydomonas*, TNY1 functions upstream of CDKG1 and appears to repress the  
402 accumulation of *CDKG1* mRNA and CDKG1 protein. Unlike Whi3, cytosolic TNY1 does not  
403 impact the nuclear localization of CDKG1. Musashi proteins (MSIs) are metazoan hnRNP that  
404 play a role in stem cell maintenance and proliferation (35). While the targets of MSIs are not  
405 fully defined, they primarily bind to 3' UTRs of mRNAs and regulate mRNA stability and/or  
406 translation (36, 37). Future work aimed at systems-level understanding of cell size regulatory  
407 networks may reveal additional parallels for RNA binding proteins such as TNY1 in cell size and  
408 cell cycle control.

409

## 410 **Methods**

### 411 ***Chlamydomonas* strains and growth conditions**

412 Strains were maintained on Tris-acetate-phosphate (TAP) + 1.5% agar plates. For synchronous  
413 growth they were cultured at 25°C in Sueoka's High-Salt-Media (HSM) liquid media (38) with  
414 diurnal cycles as indicated and 300  $\mu$ E total light intensity (50% Blue:50% Red = 150  $\mu$ E blue at  
415 465 nm and 150  $\mu$ E red at 625 nm LED lights) bubbling with 1% CO<sub>2</sub>. Diurnal light regimes used  
416 are described in figure legends and text.

417 Gamete generation, mating, and zygote germination were performed following standard  
418 protocols (39-41). Segregation analysis was done with randomly selected progeny from mating.  
419 Dark-shift experiments, commitment assays, and cell-size distribution measurements with a  
420 Coulter Counter (Beckman Multisizer 3) were conducted as described previously (42). The  
421 mode size for a particular cell population was determined from the peak of a smoothed log-  
422 normal size histogram curve. Modal cell size and mean cell size were calculated manually using

423 cells within the size range  $20 \mu\text{m}^3$  -  $2000 \mu\text{m}^3$ . Particle sizes above and below this range are  
424 rare, and mostly consist of small debris or large clumps.

425

## 426 **Chlamydomonas transformation**

427 Cells were cultured asynchronously at  $25^\circ\text{C}$  in TAP liquid media (43) with constant light 100  $\mu\text{E}$   
428 total light intensity (50% Blue:50% Red – 50  $\mu\text{E}$  blue at 465 nm and 50  $\mu\text{E}$  red at 625 nm LED  
429 lights) bubbling with filtered air. Cells were transformed using electroporation as previously  
430 described (24). Transformants were plated on TAP agar plates with either 15  $\mu\text{g}/\text{mL}$  of  
431 paromomycin or 25  $\mu\text{g}/\text{mL}$  of hygromycin depending on selection markers.

432

## 433 **Forward genetic screen for size mutant and mapping of *tny1-***

### 434 **1**

435 Wild-type strain CC124 was subject to an insertional mutagenesis using vector pSI103 (25)  
436 linearized with NotI and transformed using the glass bead method (44) with selection on TAP  
437 agar plates containing 12  $\mu\text{g}/\text{mL}$  paromomycin. Transformants were picked and re-grown in  
438 individual wells of 96 well plates, then stamped onto TAP agar plates using a 48 Multi-Blot  
439 Replicator (, which delivers  $\sim 3 \mu\text{L}$  hanging drop) on a light shelf at  $25^\circ\text{C}$  for 6 days.  
440 Approximately 1/3 of each stamped spot was removed with a toothpick and resuspended in  
441 nitrogen-free HSM in a new 96 well plate to create a gamete suspension. Gametes were then  
442 checked for cell size using a Coulter Counter. Confirmed mutants were then crossed to wild-  
443 type strain CC125, and progeny were tested for linkage of the suppressor phenotype to the  
444 pSI103 insertion. The *tny1-1* insertion site was determined by sequencing junction fragments  
445 from ligation mediated PCR (45), and the insertion site was confirmed using genotyping primers  
446 for *tny1-1* (Supplementary Table).

447

## 448 **Diploid generation**

449 Diploid selection was done by plating crosses (described below) shortly after mating on double  
450 selection plates with antibiotics to select for both parent stains. Wild type *TNY1 TNY1* vegetative  
451 diploids were generated by a mating between wild type CC-1039 wild type (Sager's 21 gr) (*NIT1*  
452 *NIT2* (Nit+) *MT+*) and wild type CC124 transformed with pKS-aph7''-lox (46) (*MT-*, hygromycin  
453 resistant, *nit1 nit2* (Nit-)) with selection on 25 µg/mL hygromycin and nitrate as the only nitrogen  
454 source. Heterozygous *TNY1 tny1* vegetative diploids were generated by a mating between wild  
455 type CC-1039 and *tny1-1* (*MT-*, paramomycin resistant) with selection on paramomycin with  
456 nitrate as the only nitrogen source. Homozygous *tny1 tny1* vegetative diploids were generated  
457 by mating between a *tny1 MT+ Nit+* segregant from a cross with CC-1039 and *tny1* transformed  
458 with Aph7, with selection on plates with 25 µg/mL hygromycin and nitrate as the only nitrogen  
459 source. Diploid candidates validated by genotyping with mating-type loci primers (47).

460

## 461 **Rescue of *tny1-1***

462 A 3.4 kb fragment containing the full-length genomic region of *TNY1* was amplified from  
463 genomic DNA using primers TNY KpnI/TNY NdeI listed in Supplementary Table. The amplified  
464 fragment was digested with KpnI/NdeI and ligated into KpnI/NdeI digested vector pHyg3  
465 linearized with the same restriction enzymes to generate *tny1* rescue construct *pTNY1*. A triple  
466 hemagglutinin epitope tag (3xHA) was inserted into pTNY1 just before the stop codon into a  
467 BglII site created by overlapping PCR with 2 fragments amplified with oligos TNYKpnI/  
468 TNYBglIIRev and TNY BglIIIF/TnyNdeIIF (Supplementary Table). A triple HA epitope tag (3xHA)  
469 was amplified from 3xHA-MAT3 (16) with oligos HABglIIIF/HABglIIIR cut with BglII and inserted  
470 at the BglII site just before the translation stop codon.

471 *pTNY1* or *pTNY1-3xHA* were transformed into *tny1* by electroporation as described above with  
472 selection on TAP agar with 30 µg/mL hygromycin. Individual transformants were picked into 96  
473 well plates and screened for gamete cell sizes as described above for screening insertional  
474 mutants. TNY1 expression was confirmed by immunoblotting (see below).

475

## 476 **Mis-expression of TNY1**

477 To generate pRPL23-TNY1, full genomic *TNY1* fragment between the start and stop codons  
478 was amplified with primers BamHI TNY1 F and Xho1 TNY1 R (Supplementary Table) from *tny1*  
479 rescue construct pTNY1. The amplified *TNY1* fragment was digested with BamH1 and Xho1  
480 and inserted into pRPL23:Luc:RPL23 (24), then recombined with plasmid pKS-aph7''-lox (46) to  
481 generate pRPL23-TNY1-aph7. pRPL23-TNY1-aph7 or pKS-aph7''-lox (negative control) were  
482 transformed into *tny1-1* by electroporation (see above). Transformants were selected on TAP  
483 agar plates containing 25 µg/mL hygromycin.

484

## 485 **Phylogenetic analysis of TNY1 and hnRNP proteins**

486 BLAST searching was done within NCBI or on Phytozome (17) using Chlamydomonas TNY1  
487 protein sequence as a query to find high-scoring hits in plants, green algae and holozoans.  
488 Tandem RNA binding domain proteins are found in most eukaryotes, with several  
489 representatives besides TNY1 within Chlamydomonas. However, the top BLAST hits for TNY1  
490 were found outside of Chlamydomonas as single best hits within other species of green algae,  
491 including three representative volvocine algal species (*Gonium pectorale*, *Tetrabaena socialis*,  
492 *Volvox carter*). The sequences were aligned using MAFFT within Guidance2 (48), and the well-  
493 supported portion of the alignment of 158 residues containing the RNA binding domains was  
494 retained for phylogenetic analysis. Some duplicates and very closely related sequences were  
495 removed to reduce redundancy, with a final group of 39 proteins used for phylogenetic

496 reconstruction. Evolutionary models were tested using Modeltest-NG (49), with the best model  
497 being LG+G(1.46)+I(0.08). A maximum likelihood phylogeny was estimated using W-IQ-tree  
498 (50) with approximate likelihood ratio testing of branch support.

499

## 500 **TNY1 antibody generation**

501 A full length *TNY1* cDNA was amplified with primers TNY1-1F and TNY1-1R (Supplementary  
502 Table) from cDNA prepared using RNA from wild-type strain CC124 and inserted into pGEM-T  
503 easy vector (Promega) to generate pGEM-TNY1. After verification by Sanger sequencing the  
504 *TNY1* cDNA fragment was released by digestion with NdeI and XhoI (NEB) and inserted into  
505 vector pET28a digested with NdeI and XhoI. The construct was transformed into *E. coli* strain  
506 BL21 codon plus-RIL (DE3) (Agilent technologies). Induction of recombinant TNY1 expression  
507 in *E. coli* and purification of insoluble 6xHis-TNY1 was performed under denaturing conditions  
508 as described previously (16). Purified 6xHis-TNY1 was cut out from a Coomassie blue stained  
509 SDS-PAGE gel and sent to Cocalico Biological Inc. to generate rabbit polyclonal anti-sera.  
510 Polyclonal antibodies were affinity purified with AminoLink Plus Resin (Thermo Fisher) coupled  
511 to purified GST-TNY1 (see below).

512

## 513 **Protein extraction and western blotting**

514 Chlamydomonas cultures were grown as described above and harvested by centrifugation at  
515 4000g for 5 min after adding tween-20 to a final concentration of 0.005%. Pellets were washed  
516 in PBS and resuspended in lysis solution (1xPBS pH 7.4, 1x Sigma plant protease Inhibitor, 5  
517 mM Na<sub>3</sub>VO<sub>4</sub>, 1 mM NaF, 1mM Benzamidine, 500 mM PMSF, 1 μM ALLN, 1 μM MG-132) to a  
518 final concentration of 5x10<sup>8</sup> cells/mL, and immediately frozen in liquid nitrogen. Pellets were  
519 thawed on ice and centrifuged at 12,000 g for 10 min at 4°C. Supernatants were transferred into  
520 a new tube and boiled for 5 min in SDS protein loading buffer as whole cell lysates. Total protein

521 was separated on 12% SDS-PAGE gels and wet-transferred to PVDF membranes at 50 Volt for  
522 1hr. Membranes were blocked in PBS containing 9% nonfat dry milk, incubated overnight with  
523 primary antibodies (1:5000  $\alpha$ -TNY1, 1:10,000 Roche Rat-anti-HA, high affinity 3F10, or 1:50,000  
524 Invitrogen  $\alpha$ -Histone H3) in 5% non-fat dry milk. Membranes were then washed in PBS  
525 containing 0.1% Tween 4 x 15 min, incubated at room temperature with secondary antibodies  
526 coupled to horseradish peroxidase (1:20,000 Thermo Fisher goat-anti-rabbit, or 1:20,000  
527 Millipore Sigma goat-anti-rat in 5% nonfat dry milk). Membranes were washed again in PBS  
528 containing 0.1% Tween 4 x 15 min, then subject to chemiluminescent detection using  
529 autoradiographic film or a Bio-Rad quantitative imaging system (Chemi Doc™ XRS+ Imaging  
530 System).

531

## 532 **qRT-PCR**

533 Total RNA samples were extracted at different time points from synchronized strains using a  
534 Trizol-like reagent following the method of (15) then digested with RNase-free Turbo DNase  
535 following the manufacturer's protocol. 4  $\mu$ g total RNA was reverse transcribed with oligo dT and  
536 random hexamers (9:1) using Thermo Script Reverse Transcriptase at 25°C for 10 min, 42°C for  
537 10 min, 50°C for 20 min, 55°C for 20 min, 60°C for 20 min, 85°C for 5 min. SYBR-Green based  
538 qPCR reactions in two technical duplicates of two biological replicates were performed and  
539 quantitated in a Bio-Rad CFX96 system. Each 10  $\mu$ L reaction contained 0.1  $\mu$ L cDNA, 1x  
540 Invitrogen Taq buffer, 3.5 mM MgCl<sub>2</sub>, 0.5x SYBR Green I, 0.05% Tween 20, 0.05 mg/mL BSA,  
541 5% DMSO, 200  $\mu$ M dNTPs, 0.3  $\mu$ M primers, and 5U of Invitrogen Taq DNA polymerase.  
542 Expression was normalized against *GBLP* (GenBank NC\_057009.1) as an internal control. The  
543 melting curve was examined for each reaction to ensure that no primer dimers or non-specific  
544 PCR products were present. qPCR primers for *CDKG1*, *TNY1*, and *GBLP* can be found in the  
545 Supplementary Table.

546

## 547 **Light microscopy**

548 Chlamydomonas cells were fixed in 0.2% glutaraldehyde final concentration. Cells were  
549 mounted on slides and imaged with a Leica DMI 6000 B microscope with a 63\* oil objective and  
550 DIC optics with images taken using a Photometrics Coolsnap HQ2 CCD camera.

551

## 552 **Immunofluorescence microscopy**

553 *TNY1-HA::tny1*, *HA-gCDKG1::cdkg1-2* (2), or *HA-gCDKG1::cdkg1-2 tny1-1* strains were  
554 synchronized as described above on a 14hr light: 10hr dark diurnal cycle. S/M phase cells were  
555 collected at ZT 15 hrs and daughter cells at ZT 23 hrs. Cells were centrifuged and collected in  
556 an Eppendorf tube, fixed with 2% paraformaldehyde in PBSP (1x PBS pH7.4, 1 mM DTT, 1x  
557 Sigma plant protease inhibitor cocktail) for 30 min on ice. Fixed cells were extracted in cold  
558 methanol 3 x 10 min at -20°C and rehydrated in PBSP for 30 min on ice. Cells were blocked for  
559 30 min in blocking solution I (5% BSA and 1% cold water fish gelatin in PBSP) and 30 min in  
560 blocking solution II (10% goat serum, 90% blocking solution I). Cells were incubated overnight  
561 with primary antibody  $\alpha$  HA antibodies (Roche 3F10) (1:1000 dilution in 20% blocking solution I)  
562 at 4°C, then washed 3 x 10 min in 1% blocking solution I at room temperature. Cells were then  
563 incubated with 1:1000 Alexa Fluor 568 conjugated goat anti-mouse IgG in 20% blocking solution  
564 I for 1 hr at 4°C and then incubated with 4',6-Diamidino-2-Phenylindole, Dihydrochloride (DAPI)  
565 at a final concentration of 5ug/mL for 5 min. Cells were washed in 1 x PBS for 3 x 10 min. Cells  
566 were mounted in 9:1 Mowiol: 0.1% 1, 4-phenylenediamine (PPD), and imaged with a Leica DMI  
567 6000 B microscope with a 63x oil objective (NA 1.40) and a Photometrics Coolsnap HQ2 CCD  
568 camera. Fluorescence illumination was provided by a metal halide lamp (Prior Lumen 200  
569 Fluorescence Illumination Systems) using a Leica A4 filter cube (ex 360/40; em 470/40) for  
570 DAPI imaging and TX2 filter cube (ex 560/40; em 630/75) for detection of TNY1.



571

## 572 **Construction of a TNY1-mCherry expressing strain**

573 To generate a fluorescence protein-tagged *tny1* complemented strain, a *pTNY1:gTNY1-GFP-*  
574 *TNY1 3' UTR* construct was generated first. Chlamydomonas codon optimized GFP fragment  
575 (SpeI-SacI-BamHI-GFP-Xba-Xho-EcoR-NcoI) was amplified from *pMF124cGFP* (51) and  
576 digested by SpeI and NcoI, followed by insertion into *RPL23:Luc:RPL23* which is digested by  
577 XbaI and NcoI. A fragment of *pTNY1:gTNY1*, including the promoter region, 5'UTR, and exons  
578 and intron of genomic TNY1, was amplified and digested with SacI and BamHI, and inserted  
579 into the above modified GFP plasmid. TNY1 3'UTR and terminator region was amplified and  
580 digested with XbaI and EcoRI, followed by insertion into the above *pTNY1:gTNY1-GFP*  
581 backbone.

582 Chlamydomonas codon-optimized mCherry was amplified using a primer set of BamHI  
583 mCherry F and XbaI mCherry R (Supplementary Table) from pLM006 (20), digested with  
584 BamHI and XbaI, then used to replace GFP in the plasmid *pTNY-GFP* digested with BamHI  
585 and XbaI to create plasmid *pTNY1-mCherry*. *pTNY1-mCherry* was transformed into *tny1-1* and  
586 rescued transformants were identified by measuring gamete sizes as described above and then  
587 confirmed by immunoblotting and measuring sizes of vegetative daughter cells. for *TNY1-*  
588 *mCherry* using  $\alpha$  TNY1 antibody.

589

## 590 **Live cell confocal fluorescence microscopy**

591 *pTNY1-mCherry* expressing transformants or a rescued negative control strain expressing  
592 *pTNY1-HA* were synchronized and harvested throughout the multiple fission cell cycle. Live  
593 cells were immobilized on a very thin layer of TAP agar on a glass slide, and topped with a  
594 coverslip, which was sealed with PicoDent following the manufacturer's instructions  
595 (<https://www.picodent.de/>). Cells were imaged using a Leica SP8-X confocal microscope

596 equipped with a white light laser and a 405 nm diode laser. TNY1-mCherry was detected with  
597 570 nm excitation and a 550-650 nm emission window. Fluorescence lifetime gating 0 - 4.9 ns  
598 was used to remove most of the chlorophyll background signal. Chlorophyll was detected using  
599 405 nm excitation and a 676-704 nm emission window.

600

## 601 **Native gel separation and detection of TNY1 RNP complexes**

602 50 mL samples from Chlamydomonas cultures at  $10^6$  cells/mL were mixed with Tween-20 to a  
603 final concentration of 0.005% and collected by centrifugation at 4000 g for 5 min. Pellets were  
604 washed in PBS and resuspended in lysis solution (1xPBS pH 7.4, 1x Roche plant protease  
605 Inhibitor, 1 mM PMSF) to a final concentration of  $5 \times 10^8$  cells/mL, and immediately frozen in  
606 liquid nitrogen. Pellets were thawed on ice and centrifuged at 12,000 g for 10 min at 4°C.  
607 For RNA binding assays, 20  $\mu$ L of supernatant was incubated with different RNase dilutions  
608 1:10, 1:100 or 1:1000 (stock 10 mg/mL, NEB) or with 1:10 Dnase I (stock 2 U/ $\mu$ L, Roche), and  
609 micrococcal nuclease (stock 2000 U/ $\mu$ L, NEB). 6\* protein loading sample buffer without DTT or  
610 SDS was added to samples before loading into a precast native 4-12% tris glycine gel  
611 (Invitrogen) without SDS in Tris-Glycine running buffer. A mixture containing aldolase, BSA and  
612 ferritin was used as a molecular weight marker. Native PAGE gels were transferred to  
613 nitrocellulose membranes in 25 mM Tris, 192 mM glycine, 20% methanol. Blots were blocked in  
614 1x PBS with 5% non-fat dry milk for 1h at room temperature and incubated with 1:2500 anti-  
615 TNY diluted in PBST (PBS + 0.05% Tween-20) with 3% dry milk at 4°C overnight. After washing  
616 in PBST for 3\* 10 min, the blot was incubated with horseradish peroxidase (HRP) conjugated  
617 goat-anti-rabbit-IgG (1:5000, Pierce ECL) for 1hr at RT, then washed in PBST for 3\* 10 min, and  
618 processed for chemi-luminescence (Luminata forte, Millipore).

619

## 620 **<sup>32</sup>P RNA radio-labeling**

621 *CDKG1* DNA for *in vitro* transcription was amplified from genomic DNA with oligos containing a  
622 T7 promoter (Supplementary Table). <sup>32</sup>P labeled RNA was generated/ transcribed *in vitro* using  
623 a Maxiscript kit in the presence of  $\alpha$ -<sup>32</sup>P-CTP (NEN) according to manufacturer instructions.  
624 Each 25  $\mu$ L reaction had the following components: DNA template 0.5 $\mu$ g, 10x Transcription  
625 buffer 2  $\mu$ L, 0.5 mM ATP, 10mM GTP 1  $\mu$ L, 10mM UTP 1  $\mu$ L, 500 $\mu$ M CTP 1  $\mu$ L, <sup>32</sup>P-CTP 2  $\mu$ L  
626 (10 mCi/mL), 2  $\mu$ L T7 RNA polymerase. After 1hr reaction at 30°C, the mixture was treated with  
627 DNaseI (ambion) and purified with Sigma post reaction clean-up columns SigmaSpin™ to  
628 remove unincorporated nucleotides. RNA integrity was visualized by separating a sample of the  
629 RNA on a urea denaturing 4% polyacrylamide gel followed by autoradiography.

630

## 631 **GST-TNY recombinant protein expression**

632 The *TNY1* cDNA coding sequences were cloned into the Gateway pDEST15-GST (glutathione  
633 S-transferase) plasmid using the procedures recommended by the manufacturer (Invitrogen)  
634 with oligos listed in Supplementary Table 1. Mutations in TNY1 RRM1 and RRM2 motifs,  
635 RRM1\* and RRM2\* respectively, were introduced with Quick change mutagenesis kit with oligos  
636 listed in Supplementary Table. To generate TNY1 RRM1\* RRM2\* double mutant, TNY-RRM1\*  
637 was digested with NdeI/SalI and ligated into TNY RRM2\* in pENTR, and then moved to  
638 Gateway pDEST15 destination vector. GST-TNY constructs were transformed into *E.coli* BL21  
639 codon plus-RIL strain (Agilent Technologies). Cells were grown in LB media and induced for 5  
640 hrs at 30°C with 0.5 mM isopropyl- $\beta$ -d-thiogalactopyranoside (IPTG) when cultures reached an  
641 O.D.600 of 0.5. After induction, cells were harvested by centrifugation and dry cell pellets stored  
642 at -80 °C. Frozen cells were thawed on ice and resuspended in one-tenth original culture  
643 volume of EB (100 mM Tris-HCl, pH 8.0, 500 mM NaCl, and 10 mM imidazole), sonicated eight  
644 times for 2 min each on ice with a Branson sonicator (50% power with a duty cycle of 0.5s on

645 and 0.5 s off) followed by supernatant clearance by centrifugation at 12,000g for 10 min. GST-  
646 TNY recombinant proteins were purified from the soluble fraction using Glutathione Sepharose  
647 beads (Amersham) following the product manual.

648

## 649 **TNY1 RNA binding assay**

650 Equal amounts of GST purified proteins estimated based on Ponceau S staining were  
651 separated by SDS-10% PAGE and transferred to a nitrocellulose membrane (0.22- $\mu$ m pore size)  
652 and stained with Ponceau S. The membrane was incubated at 4°C overnight with re-naturation  
653 buffer: 50 mM tris-HCl pH 7.5, 100 mM KCl, 1% Triton X-100 and 10% glycerol. After re-  
654 naturation, the membrane was incubated for 1hr with reactivation buffer (Tris-HCl pH 7.5, 0.1 %  
655 triton X-100, 10% glycerol) at room temperature, blocked for one hour with yeast tRNA (80  
656  $\mu$ g/mL) in reactivation buffer followed by incubation with <sup>32</sup>P labeled RNA in reactivation buffer  
657 for 3 hrs. Membranes were washed 4 times with reactivation buffer and exposed to X-ray film  
658 for 2 days at -80°C before development.

659

## 660 **Acknowledgement**

661 We thank Tuya Wulan, Fuqin Sun, Richard Davenport, Thomas Connell, Kerri Husa, Nazifa  
662 Hoque, Jie Li, Dylan Wetzel, Hunter Draffen, Brooke Harris, Zach Jaudes, and Chris Reynolds  
663 for laboratory support. We thank Dr. Kirk Czymmek, Dr. Anastasiya Klebanovych, and Dr.  
664 Howard Berg at the Danforth Plant Science Center for the guidance on microscopy. This work  
665 was funded by NIH R01GM092744, NIH R01GM126557, NSF MCB 1515220 to Dr. James  
666 Umen, and facilitated by the research instruments acquired through NSF DBI 2018962 to the  
667 Danforth Plant Science Center.

668

## 669 **References**

- 670 1. Schmoller KM, Skotheim JM. The Biosynthetic Basis of Cell Size Control. *Trends Cell*  
671 *Biol.* 2015;25(12):793-802.
- 672 2. Li Y, Liu D, López-Paz C, Olson BJSC, Umen JG. A new class of cyclin dependent  
673 kinase in *Chlamydomonas* is required for coupling cell size to cell division. *eLife*.  
674 2016;5:e10767.
- 675 3. Amodeo AA, Skotheim JM. Cell-Size Control. *Cold Spring Harb Perspect Biol.*  
676 2016;8(4):a019083.
- 677 4. Facchetti G, Chang F, Howard M. Controlling cell size through sizer mechanisms.  
678 *Current Opinion in Systems Biology.* 2017;5:86-92.
- 679 5. D'Ario M, Sablowski R. Cell Size Control in Plants. *Annu Rev Genet.* 2019;53:45-65.
- 680 6. Xie S, Skotheim JM. Cell-size control: Chromatin-based titration primes inhibitor dilution.  
681 *Current Biology.* 2021;31(19):R1127-R9.
- 682 7. D'Ario M, Tavares R, Schiessl K, Desvoyes B, Gutierrez C, Howard M, et al. Cell size  
683 controlled in plants using DNA content as an internal scale. *Science.* 2021;372(6547):1176-81.
- 684 8. Schmoller KM, Lanz MC, Kim J, Koivomagi M, Qu Y, Tang C, et al. Whi5 is diluted and  
685 protein synthesis does not dramatically increase in pre-Start G1. *Molecular Biology of the Cell.*  
686 2022;33(5):lt1.
- 687 9. Swaffer MP, Kim J, Chandler-Brown D, Langhinrichs M, Marinov GK, Greenleaf WJ, et  
688 al. Transcriptional and chromatin-based partitioning mechanisms uncouple protein scaling from  
689 cell size. *Molecular Cell.* 2021;81(23):4861-75.e7.
- 690 10. Zatulovskiy E, Zhang S, Berenson DF, Topacio BR, Skotheim JM. Cell growth dilutes the  
691 cell cycle inhibitor Rb to trigger cell division. *Science.* 2020;369(6502):466-71.
- 692 11. Cross FR, Umen JG. The *Chlamydomonas* cell cycle. *The Plant Journal.*  
693 2015;82(3):370-92.

- 694 12. Umen JG. The elusive sizer. *Current Opinion in Cell Biology*. 2005;17(4):435-41.
- 695 13. Umen JG. Sizing up the cell cycle: systems and quantitative approaches in  
696 *Chlamydomonas*. *Current Opinion in Plant Biology*. 2018;46:96-103.
- 697 14. Umen JG, Goodenough UW. Control of cell division by a retinoblastoma protein homolog  
698 in *Chlamydomonas*. *Genes & Development*. 2001;15(13):1652-61.
- 699 15. Fang S-C, Reyes Cdl, Umen JG. Cell size checkpoint control by the retinoblastoma  
700 tumor suppressor pathway. *PLOS Genetics*. 2006;2(10):e167.
- 701 16. Olson BJSC, Oberholzer M, Li Y, Zones JM, Kohli HS, Bisova K, et al. Regulation of the  
702 *Chlamydomonas* cell cycle by a stable, chromatin-associated retinoblastoma tumor suppressor  
703 complex. *The Plant Cell*. 2010;22(10):3331-47.
- 704 17. Goodstein DM, Shu S, Howson R, Neupane R, Hayes RD, Fazo J, et al. Phytozome: a  
705 comparative platform for green plant genomics. *Nucleic Acids Research*. 2011;40(D1):D1178-  
706 D86.
- 707 18. Krecic AM, Swanson MS. hnRNP complexes: composition, structure, and function. *Curr*  
708 *Opin Cell Biol*. 1999;11(3):363-71.
- 709 19. Wahl MC, Will CL, Lührmann R. The spliceosome: design principles of a dynamic RNP  
710 machine. *Cell*. 2009;136(4):701-18.
- 711 20. Mackinder LC, Meyer MT, Mettler-Altmann T, Chen VK, Mitchell MC, Caspari O, et al. A  
712 repeat protein links Rubisco to form the eukaryotic carbon-concentrating organelle. *Proc Natl*  
713 *Acad Sci U S A*. 2016;113(21):5958-63.
- 714 21. Zones JM, Blaby IK, Merchant SS, Umen JG. High-resolution profiling of a synchronized  
715 diurnal transcriptome from *Chlamydomonas reinhardtii* reveals continuous cell and metabolic  
716 differentiation. *The Plant Cell*. 2015;27(10):2743-69.
- 717 22. Strenkert D, Schmollinger S, Gallaher SD, Salomé PA, Purvine SO, Nicora CD, et al.  
718 Multiomics resolution of molecular events during a day in the life of *Chlamydomonas*.

- 719 Proceedings of the National Academy of Sciences of the United States of America.  
720 2019;116(6):201815238.
- 721 23. Berry S, Pelkmans L. Mechanisms of cellular mRNA transcript homeostasis. Trends Cell  
722 Biol. 2022;32(8):655-68.
- 723 24. López-Paz C, Liu D, Geng S, Umen JG. Identification of *Chlamydomonas reinhardtii*  
724 endogenous genic flanking sequences for improved transgene expression. The Plant Journal.  
725 2017;92(6):1232-44.
- 726 25. Sizova I, Fuhrmann M, Hegemann P. A *Streptomyces rimosus* aphVIII gene coding for a  
727 new type phosphotransferase provides stable antibiotic resistance to *Chlamydomonas*  
728 *reinhardtii*. Gene. 2001;277(1-2):221-9.
- 729 26. Shen Y, Liu Y, Liu L, Liang C, Li QQ. Unique features of nuclear mRNA poly(A) signals  
730 and alternative polyadenylation in *Chlamydomonas reinhardtii*. Genetics. 2008;179(1):167-76.
- 731 27. Gagliardi M, Matarazzo MR. RIP: RNA Immunoprecipitation. Methods Mol Biol.  
732 2016;1480:73-86.
- 733 28. Einarson MB, Pugacheva EN, Orlinick JR. Preparation of GST Fusion Proteins. CSH  
734 Protoc. 2007;2007:pdb.prot4738.
- 735 29. Schmoller KM, Turner JJ, Kõivomägi M, Skotheim JM. Dilution of the cell cycle inhibitor  
736 Whi5 controls budding-yeast cell size. Nature. 2015;526(7572):268-72.
- 737 30. Heldt FS, Lunstone R, Tyson JJ, Novák B. Dilution and titration of cell-cycle regulators  
738 may control cell size in budding yeast. PLoS Comput Biol. 2018;14(10):e1006548.
- 739 31. Nash RS, Volpe T, Futcher B. Isolation and characterization of WHI3, a size-control  
740 gene of *Saccharomyces cerevisiae*. Genetics. 2001;157(4):1469-80.
- 741 32. Garí E, Volpe T, Wang H, Gallego C, Futcher B, Aldea M. Whi3 binds the mRNA of the  
742 G1 cyclin CLN3 to modulate cell fate in budding yeast. Genes Dev. 2001;15(21):2803-8.
- 743 33. Wang H, Garí E, Vergés E, Gallego C, Aldea M. Recruitment of Cdc28 by Whi3 restricts  
744 nuclear accumulation of the G1 cyclin-Cdk complex to late G1. Embo j. 2004;23(1):180-90.

- 745 34. Colomina N, Ferrezuelo F, Wang H, Aldea M, Garí E. Whi3, a developmental regulator  
746 of budding yeast, binds a large set of mRNAs functionally related to the endoplasmic reticulum.  
747 J Biol Chem. 2008;283(42):28670-9.
- 748 35. Horisawa K, Imai T, Okano H, Yanagawa H. The Musashi family RNA-binding proteins in  
749 stem cells. Biomol Concepts. 2010;1(1):59-66.
- 750 36. Kudinov AE, Karanicolas J, Golemis EA, Bumber Y. Musashi RNA-Binding Proteins as  
751 Cancer Drivers and Novel Therapeutic Targets. Clin Cancer Res. 2017;23(9):2143-53.
- 752 37. Okano H, Imai T, Okabe M. Musashi: a translational regulator of cell fate. J Cell Sci.  
753 2002;115(Pt 7):1355-9.
- 754 38. Sueoka N. MITOTIC REPLICATION OF DEOXYRIBONUCLEIC ACID IN  
755 CHLAMYDOMONAS REINHARDI. Proc Natl Acad Sci U S A. 1960;46(1):83-91.
- 756 39. Harris EH. 2 - Culture and Storage Methods. In: Harris EH, editor. The Chlamydomonas  
757 Sourcebook. San Diego: Academic Press; 1989. p. 25-63.
- 758 40. Harris EH. 10 - Genetic Analysis. In: Harris EH, editor. The Chlamydomonas  
759 Sourcebook. San Diego: Academic Press; 1989. p. 399-446.
- 760 41. Lee JH, Lin H, Joo S, Goodenough U. Early sexual origins of homeoprotein  
761 heterodimerization and evolution of the plant KNOX/BELL family. Cell. 2008;133(5):829-40.
- 762 42. Fang S-C, Umen JG. A suppressor screen in Chlamydomonas identifies novel  
763 components of the retinoblastoma tumor suppressor pathway. Genetics. 2008;178:1295 - 310.
- 764 43. Gorman DS, Levine RP. Cytochrome f and plastocyanin: their sequence in the  
765 photosynthetic electron transport chain of Chlamydomonas reinhardi. Proceedings of the  
766 National Academy of Sciences. 1965;54(6):1665-9.
- 767 44. Kindle KL. High-frequency nuclear transformation of Chlamydomonas reinhardtii. Proc  
768 Natl Acad Sci U S A. 1990;87(3):1228-32.



- 769 45. O'Malley RC, Alonso JM, Kim CJ, Leisse TJ, Ecker JR. An adapter ligation-mediated  
770 PCR method for high-throughput mapping of T-DNA inserts in the Arabidopsis genome. Nat  
771 Protoc. 2007;2(11):2910-7.
- 772 46. Heitzer M, Zschoernig B. Construction of modular tandem expression vectors for the  
773 green alga *Chlamydomonas reinhardtii* using the Cre/lox-system. Biotechniques.  
774 2007;43(3):324, 6, 8 passim.
- 775 47. Zamora I, Feldman JL, Marshall WF. PCR-based assay for mating type and diploidy in  
776 *Chlamydomonas*. Biotechniques. 2004;37(4):534-6.
- 777 48. Sela I, Ashkenazy H, Katoh K, Pupko T. GUIDANCE2: accurate detection of unreliable  
778 alignment regions accounting for the uncertainty of multiple parameters. Nucleic Acids  
779 Research. 2015;43(W1):W7-W14.
- 780 49. Darriba D, Posada D, Kozlov AM, Stamatakis A, Morel B, Flouri T. ModelTest-NG: A  
781 New and Scalable Tool for the Selection of DNA and Protein Evolutionary Models. Molecular  
782 Biology and Evolution. 2019;37(1):291-4.
- 783 50. Trifinopoulos J, Nguyen L-T, von Haeseler A, Minh BQ. W-IQ-TREE: a fast online  
784 phylogenetic tool for maximum likelihood analysis. Nucleic Acids Research.  
785 2016;44(W1):W232-W5.
- 786 51. Fuhrmann M, Oertel W, Hegemann P. A synthetic gene coding for the green fluorescent  
787 protein (GFP) is a versatile reporter in *Chlamydomonas reinhardtii*. The Plant Journal.  
788 1999;19(3):353-61.
- 789
- 790

## 791 **Figure legends**

### 792 **Figure 1. Identification of TNY1 as a regulator of cell size in the retinoblastoma pathway.**

793 (A) Upper panel, schematic of *TNY1* locus with location of an inserted paromomycin resistance  
794 marker (paroR in blue) in exon 1 that produced the *tny1-1* allele. Black rectangles, exons; dark  
795 gray rectangles, untranslated regions; narrow gray lines, introns, and intergenic regions. Lower  
796 panel, Differential Interference Contrast (DIC) images of daughter cells from wild-type parent  
797 strain CC124 and *tny1-1*. Scale bar = 10  $\mu$ m. (B) Size distributions of daughter cells from *tny1-1*,  
798 wild type CC124, *cdkg1-2*, and *cdkg1-2 tny1-1*. Epistasis diagram showing positive (arrows) and  
799 negative (bars) regulators of size-dependent cell division. (C) *TNY1* functions upstream of  
800 *CDKG1*. (D) Size distributions of daughter cells from *tny1-1*, wild type CC124, and *tny1-1*  
801 rescued strains *gTNY1::tny1-1* and *gTNY1-HA::tny1-1*. (E) Immunoblot of SDS PAGE separated  
802 proteins from daughter cells of indicated genotypes using  $\alpha$ -HA,  $\alpha$ -TNY1, or  $\alpha$ -histone H3  
803 (loading control).

804

### 805 **Figure 2. TNY1 encodes a hnRNP-related RNA binding protein.** (A) Schematic of predicted

806 TNY1 protein domain structure from N to C terminus. Two RNA binding motifs (RRM1 and  
807 RRM2, orange bars) are followed by a glycine-rich region and a short conserved motif (CM) at  
808 the C-terminus. (B) Maximum likelihood phylogeny TNY1 and related hnRNP related proteins in  
809 indicated taxonomic groups. Species abbreviations are followed by protein names and NCBI  
810 protein IDs. Cr, *Chlamydomonas reinhardtii*. Ts, *Tetrabaena socialis*. Gp, *Gonium pectorale*.  
811 Vc, *Volvox carteri*. Ce, *Chlamydomonas eustigma*. Ds, *Dunaliella salina*. Cs, *Coccomyxa*  
812 *subellipsoidea*. Mn, *Monoraphidium neglectum*. Mc, *Micractinium conductrix*. Os, *Oryza sativa*.  
813 Zm, *Zea mays*. At, *Arabidopsis thaliana*. Sm, *Selaginella moellendorffii*. Kn, *Klebsormidium*  
814 *nitens*. Sv, *Setaria viridis*. Atr, *Amborella trichopoda*. Pp, *Physcomitrella patens*. Mp, *Marchantia*

815 *polymorpha*. Gs, *Galdieria sulphuraria*. Dr, *Danio rerio*. Dm, *Drosophila melanogaster*. Ce,  
816 *Caenorhabditis elegans*. Hs, *Homo sapiens*. Sr, *Salpingoeca rosetta*.

817

818 **Figure 3. TNY1 is localized in the cytosol.** (A) Brightfield and confocal fluorescence images of  
819 live cells at different cell cycle phases (left side labels) expressing a functional TNY1-mCherry  
820 fusion protein. mCherry signal is false colored cyan and chlorophyll fluorescence (Chl) is false  
821 colored red. Merged fluorescent images are in the left column and brightfield images in the right  
822 column. Scale bar = 10  $\mu$ m. (B) DIC and widefield immunofluorescence microscopy images of  
823 wild type (CC124) and *gTNY1-HA::tny1-1*. Daughter cells were fixed and immuno-stained for  
824 HA epitope (green). DAPI staining (red) was used to visualize nuclei. Merged fluorescence  
825 image is on the right. Scale bar = 10  $\mu$ m.

826

827 **Figure 4. Cell cycle control of TNY1 mRNA and TNY1 protein accumulation.** (A) qRT-PCR  
828 data time series for TNY1 mRNA accumulation in synchronous cultures with light and dark  
829 phases shown in white or gray, respectively, and cell cycle phasing cartooned above. The  
830 middle and bottom graphs show data for cultures synchronized under standard conditions (top)  
831 and released into a modified regime of early dark (middle panel) or extended light (bottom  
832 panel). All data were normalized against control transcript for *GBLP*. Error bars: high and low  
833 values of two biological replicates. The value of each biological replicate is calculated as the  
834 average of two technical replicates. Top panel, standard regime - 12hr:12hr light:dark. Middle  
835 panel, early dark - 15hr:9hr light:dark. Bottom panel, extended light - 9hr:15hr light:dark. Under  
836 all three different diurnal regimes, most of the cells start to divide at ZT 12 and finish division at  
837 ZT 15. (B) qRT-PCR data time series for TNY1 mRNA accumulation in cultures similar to (A) but  
838 with altered lengths of the final dark period. Top panel, early light.1 with lights on at ZT 15.  
839 Middle panel, early light.2 with lights on at ZT 18. Bottom panel, extended dark through ZT 27.  
840 (C) and (D) Immunoblots of whole cell lysates from synchronized standard cultures shown in

841 panel (A) Upper panel were fractionated on SDS PAGE gels and probed with either  $\alpha$ -TNY1 or  
842  $\alpha$ -histone H3 as a control. Upper panel shows Coomassie staining and lower two panels show  
843 immunoblots with indicated antibodies. Gels were loaded with equal cell numbers per lane. (C)  
844 or equal protein per lane (D). (E) Schematic of TNY1 protein subscaling behavior showing how  
845 total protein per cell and concentration change during the cell cycle. The spike in TNY1 per cell  
846 during division can be interpreted as a sum of its accumulation in postmitotic mother cells with  
847 unhatched daughters. (F) TNY1 mRNA quantitation in mitotic cultures with same numbers of  
848 mother cells that are different mean sizes due to shortened or lengthened final light periods with  
849 data normalized to the standard 12:12 L:D regime. (G) Whole cell lysates of daughter cells from  
850 indicated genotypes (with two replicates 1 and 2) were loaded with equal cell number per lane,  
851 fractionated by SDS-PAGE and immunoblotted using  $\alpha$ -TNY1 or  $\alpha$ -Histone H3. Coomassie blue  
852 staining is shown.

853

854 **Figure 5. TNY1 is limiting in cell size control.** (A) Size distributions of daughter cells of diploid  
855 strains with indicated genotypes. (B) Immunoblots and Coomassie gel were loaded and  
856 processed similar to those in Figure 4 (G) using two independently generated diploids (1 and 2)  
857 for each genotype. (C) Size distributions of synchronous daughter cells of two independent  
858 *RPL23:TNY1::tny1-1* rescued strains (#13, and #17), a control strain transformed with  
859 resistance marker only (*Aph7:tny1-1* #2), and a *gTNY1::tny1-1* strain.

860

861 **Figure 6. TNY1 inhibits the accumulation of CDKG1 mRNA and CDKG1 protein.** (A) qRT-  
862 PCR quantitation of average *CDKG1* mRNA level in daughter cells of wild type and *tny1-1* using  
863 two independently cultures (1 and 2) for each genotype. Error bars: high and low values of two  
864 biological replicates. The value of each biological replicate is calculated as the average of two  
865 technical replicates. (B) Immunoblots using synchronized strains of indicated genotypes loaded  
866 with equal numbers of cells per lane and probed with  $\alpha$ -TNY1 (below) or stained with

867 Coomassie blue above. Populations used are mitotic (ZT 13) or daughters using protein (ZT 24)  
868 lysate generated from synchronous mitotic and post-mitotic populations of indicated strains.  
869 Over accumulation of HA-CDKG1 was observed in the post-mitotic *HA-CDKG1::cdkg1 tny1*  
870 cells compared with a *cdkg1* rescue strain *HA-CDKG1::cdkg1*. (C) Brightfield and confocal  
871 immunofluorescence microscopy images of *HA-CDKG1::cdkg1* and *HA-CDKG1::cdkg1 tny1*  
872 cells. Synchronous mitotic and post-mitotic cells were fixed and immunostained for HA-CDKG1  
873 ( $\alpha$ -HA, pseudo-colored green), while the nuclei were stained with DAPI (pseudo-colored red).  
874 Note that some of the  $\alpha$ -HA pixels were saturated, but all images were taken with similar  
875 settings and negative control experiments showed no nuclear staining. Scale bar = 10  $\mu$ m.

876

877 **Figure 7. TNY1 binds to RNA including CDKG1 3'UTR.** (A) TNY1 is part of a high molecular  
878 weight RNA-containing complex. Native gels were loaded with whole cell lysates of from a  
879 *gTNY1-HA::tny1-1* strain, fractionated and immunoblotted using  $\alpha$ -HA. Lysates were pre-treated  
880 with different nucleases prior to loading as indicated above each lane with RNase used at  
881 different concentrations indicated by the triangle with different RNase concentration at 0.01  
882 mg/mL, 0.1mg/mL, and 1mg/mL. The lower image is the same membrane stained with Ponceau  
883 S as a loading control. (B) GST-tagged TNY1 binds to  $^{32}$ P labeled *CDKG1* 3'UTR, but not to  
884 *CDKG1* 5'UTR and CDS in the northwestern assay. The total protein input was visualized by  
885 ponceau S staining.

886

887 **Figure 8. Model for subscaled TNY1 as a regulator of size-dependent cell cycle**  
888 **progression.** (A) In wild-type cells during early G1 phase (top half) cytosolic TNY1 binds the  
889 3'UTR of *CDKG1* mRNA and possibly other targets and prevents premature expression. Prior to  
890 and during early S/M phase (bottom half) *CDKG1* mRNA and other target mRNAs outnumber  
891 TNY1 protein which is at its lowest concentration. Translation of CDKG1 drives size-dependent  
892 cell cycle progression through phosphorylation of RBR by CDKG1/D-type cyclins and other

893 mitotic kinases in the nucleus (2). (B) In *tny1* mutants some CDKG1 is inappropriately produced  
894 in early G1 phase (top half) and may prematurely push cells to Commitment at a smaller size  
895 through ectopic phosphorylation of RBR. During S/M phase (bottom half) the absence of TNY1  
896 allows extra CDKG1 to accumulate causing an imbalance in size sensing and more cell  
897 divisions than in equivalent-sized wild-type mother cells.  
898

## 899 Supporting information

900 **Figure S1. Characterization of *tny1-1* and rescued *tny1-1* strains.** (A) Plot showing passage  
901 through Commitment (Commitment %, solid lines) and mitotic index (fraction dividing %, dashed  
902 lines) of synchronous *tny1-1*, wild type CC124, and a *tny1-1* rescued strain *gTNY1::tny1-1*  
903 collected at indicated time points during a synchronous diurnal cycle. Grey dotted line marks the  
904 time when 50% of the cells had passed Commitment (~5 hrs ZT). (B) Plot of modal cell sizes for  
905 cultures in panel (A). Grey dotted line marks cell size at 50% Commitment. (C) Division number  
906 profiles of *tny1-1* and wild type CC124 from same experiment as in panel (B). At the indicated  
907 time cells were plated on minimal media, incubated in the dark, and scored for cell divisions  
908 (see Methods). (D) Division number profiles of size-matched G1 phase cultures of *tny1-1* and  
909 wild type cells (~230  $\mu\text{m}^3$ ) taken from different times in G1 to enable *tny1-1* cultures to reach the  
910 same size as wild-type. Summary of results are in the table below. (E) Plot showing timing of  
911 Commitment for indicated genotypes, similar to panel (A). Grey dotted lines mark Commitment  
912 timing of *cdkg1-2* or *tny1-1 cdkg1-2* and wild type. (F) Plot of modal cell sizes for cultures in  
913 panel (E). Grey dotted lines mark cell sizes of strains in panel (E) showing that *cdkg1-2* and  
914 *tny1-1 cdkg1-2* have similar Commitment sizes as wild type. (G) Box and whisker plots of modal  
915 gamete sizes for individual wild type (n=44) or *tny1-1* (n=46) segregants from a back-cross  
916 between wild type and *tny1-1* (Methods). Boxes enclose the second quartile of data with  
917 horizontal lines showing median values, and whiskers enclose the 10<sup>th</sup> - 90<sup>th</sup> percentiles.  
918 Outliers are plotted as individual data points. Results of a Student's t test are shown above (\*,  
919  $p < 0.01$ ). (H) Genotyping of the indicated strains for *tny1-1*, *TNY1*, and mating type loci (mating  
920 type minus, mt-; mating type plus, mt+). (I) Growth on selective media for *tny1-1* (paromomycin  
921 resistance marker; Paro) and *tny1-1* with rescuing constructs introduced with a hygromycin  
922 resistance marker, Hyg.

923

924 **Figure S2. Multiple sequence alignment of green algal TNY1 orthologs.** Peptide alignments  
925 for subset of proteins from Fig. 2: *Chlamydomonas reinhardtii* TNY1 (Cre07.g330300), *Volvox*  
926 *carteri* (Vocar.0031s0001), *Chromochloris zofingiensis* (Cz12g11070), and *Dunaliella salina*  
927 (Dusal.0065s00006). Gene IDs are from Phytozome (17). Alignment is shaded to show  
928 conserved residues. Positions of RNA recognition motifs 1 and 2 (RRM1, RRM2) and a  
929 conserved C-terminal motif (CM) are marked. The inverted black triangle shows the position the  
930 single intron found in subclade of algal TNY1 orthologs.

931

932 **Figure S3. Detection of TNY1-mCherry expression in *gTNY-mCherry:tny1-1* strains.** Whole  
933 cell lysates of daughter cells from indicated genotypes were loaded with equal biomass per  
934 lane, fractionated by SDS-PAGE, and immunoblotted using  $\alpha$ -TNY1 (upper panel). Coomassie  
935 blue (CBB) staining is shown in the lower panel.

936

937 **Figure S4. Cell cycle and diurnal control of *TNY1* mRNA and TNY1 protein accumulation**  
938 (A) and (B) qRT-PCR data time series for *TNY1* mRNA accumulation at ZT 15, 15.5, 16.5 and  
939 19 in cultures similar to Figure 4A. (A), standard regime - 12hr:12hr light:dark. (B), early light1  
940 regime with lights on at ZT 15. All data were normalized against control transcript *GBLP*. Error  
941 bars: high and low values of two biological replicates. The value of each biological replicate is  
942 calculated as the average of two technical replicates. The corresponding tables below each  
943 qRT-PCR data summarized the biomass change by comparing cell concentration (cells/mL) and  
944 mean cell size ( $\mu\text{m}^3$ ), and the calculated biomass ( $\mu\text{m}^3 * \text{cells/mL}$ ) of the two replicates at each  
945 ZT under the two regimes. (C) and (D) Biological replicates of immunoblots described in Figs.  
946 4C and 4D. (E) *TNY1* mRNA accumulation peaks at ZT 15 under different diurnal regimes in  
947 Figure 4A. Error bars: high and low values of two biological replicates. The value of each  
948 biological replicate is calculated as the average of two technical replicates. (F) Size



949 distributions of pre-division populations at ZT 15 under different diurnal regimes in Figure 4A.

950 Numbers above the curves are the mean cell size of the corresponding populations.

951

952 **Figure S5. Dosage sensitivity of *TNY1* in haploid crosses.** (A) Box and whiskers plots of  
953 modal gamete sizes for individual progenies from a back-cross between wild type CC124 and  
954 rescued strain *gTNY tny1-1*. with genotypes *gTNY1 TNY1* (n = 25), *tny1-1* (n =23), *gTNY1 tny1-*  
955 *1* (n = 18), and wild type (n = 26). Boxes enclose the second quartile of data with horizontal  
956 lines showing median values, and whiskers enclose the 10<sup>th</sup> -90<sup>th</sup> percentiles. Outliers are  
957 plotted as individual data points. Results of a Student's t test are shown above (\*, p<0.01). (B)  
958 Similar data to (A) for a back-cross between wild type CC124 and *HA-TNY tny1-1*. (C) Size  
959 distributions of daughters from representative independent *RPL23:TNY tny1-1* strains which  
960 show rescued cell size (modal size ~80  $\mu\text{m}^3$ ) and a control transformant with made using an  
961 empty vector *Aph7 tny1-1* (modal size ~50  $\mu\text{m}^3$ ). (D) Size distributions of daughters from  
962 independent *RPL23:TNY tny1-1* strains which show a large-size phenotype (modal size >100  
963  $\mu\text{m}^3$ ) and a control strain *Aph7 tny1-1* (modal size ~50  $\mu\text{m}^3$ ).

964

965 **Figure S6. Systems level comparison of cell size control across taxa.** Cell cycle inhibitors  
966 subscaling with cell size in G1 phase are in bold red.

967

968 **Table S. Oligos used in the study.**

# Figure 1

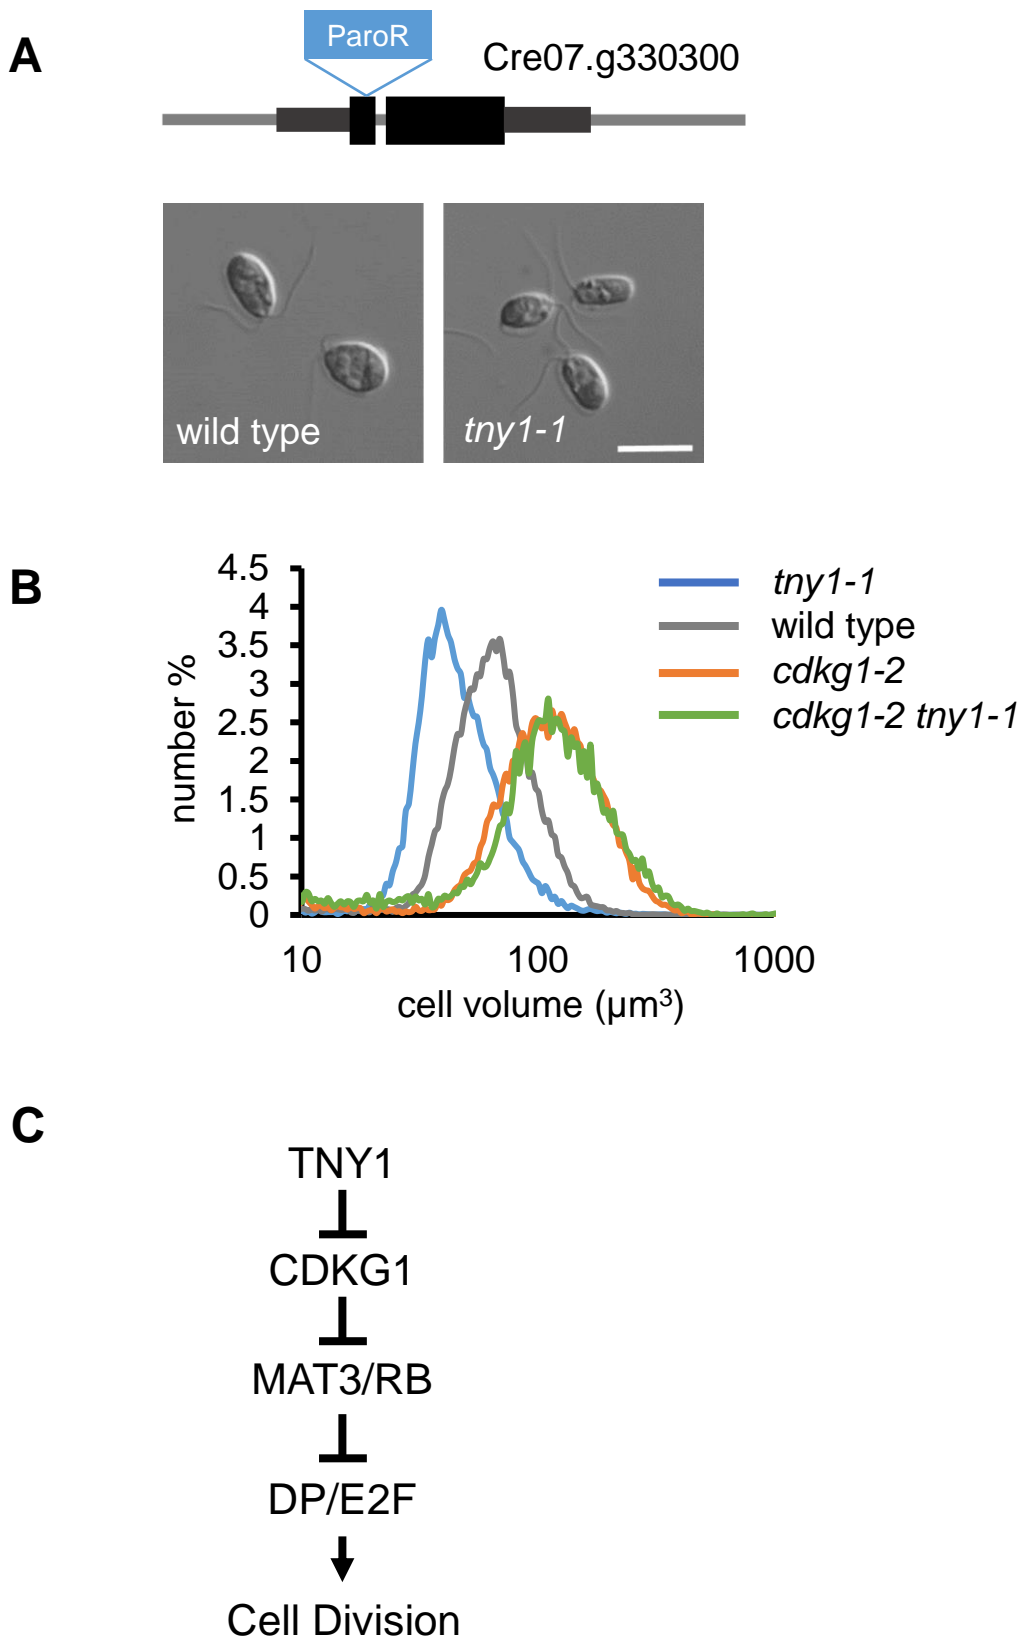

# Figure 1

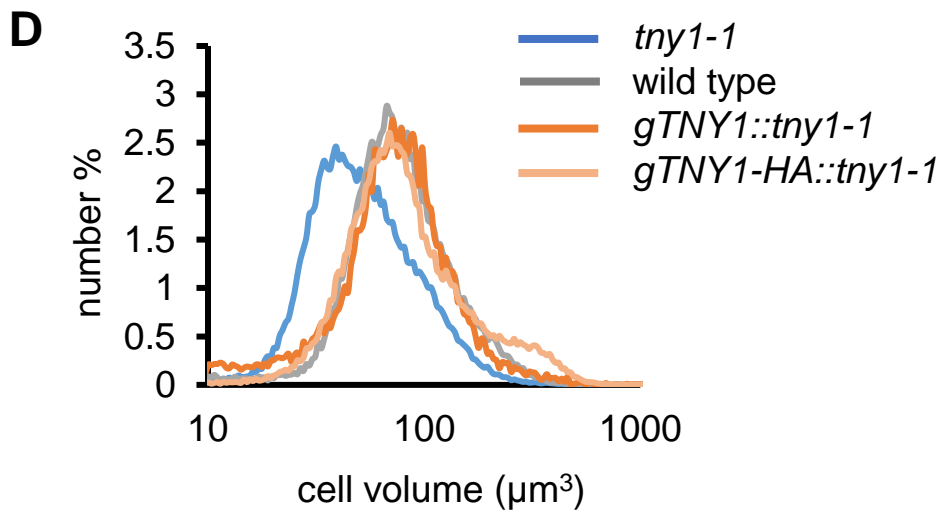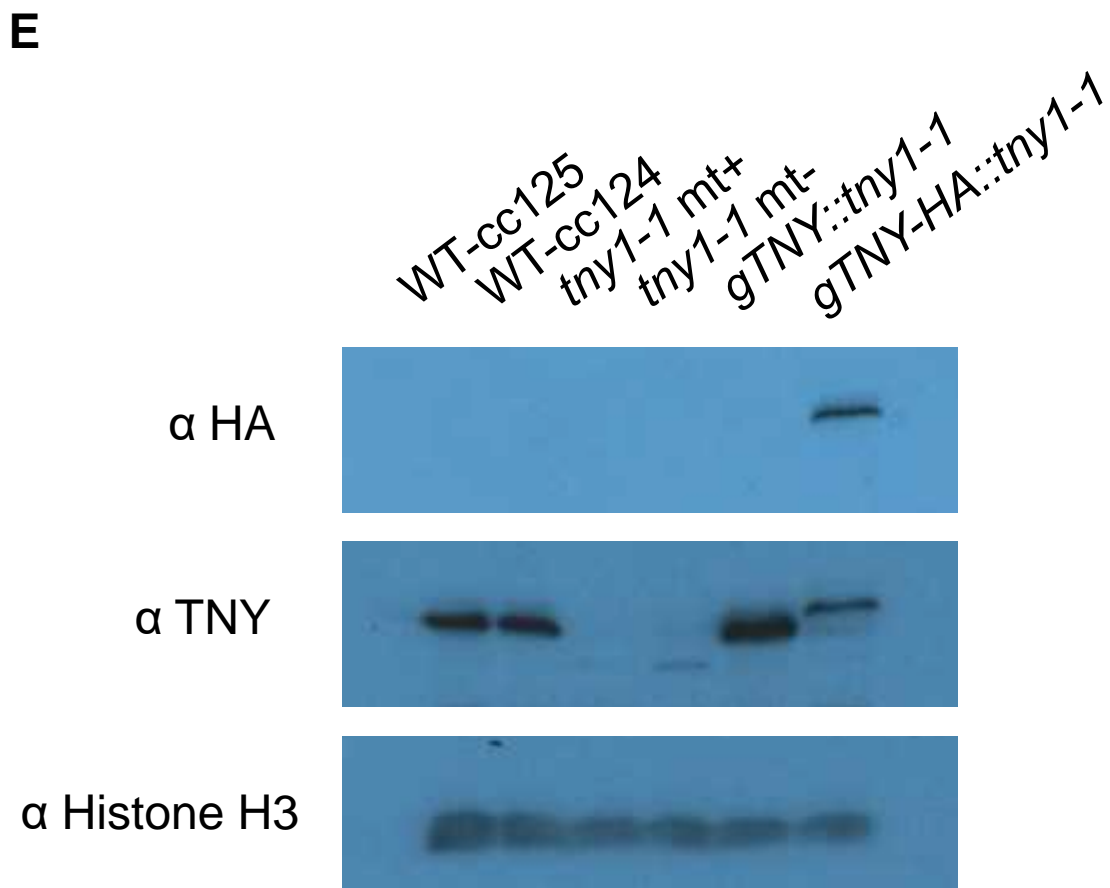

## Figure 2

**A**

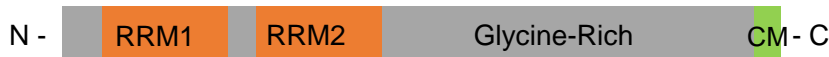

**B**

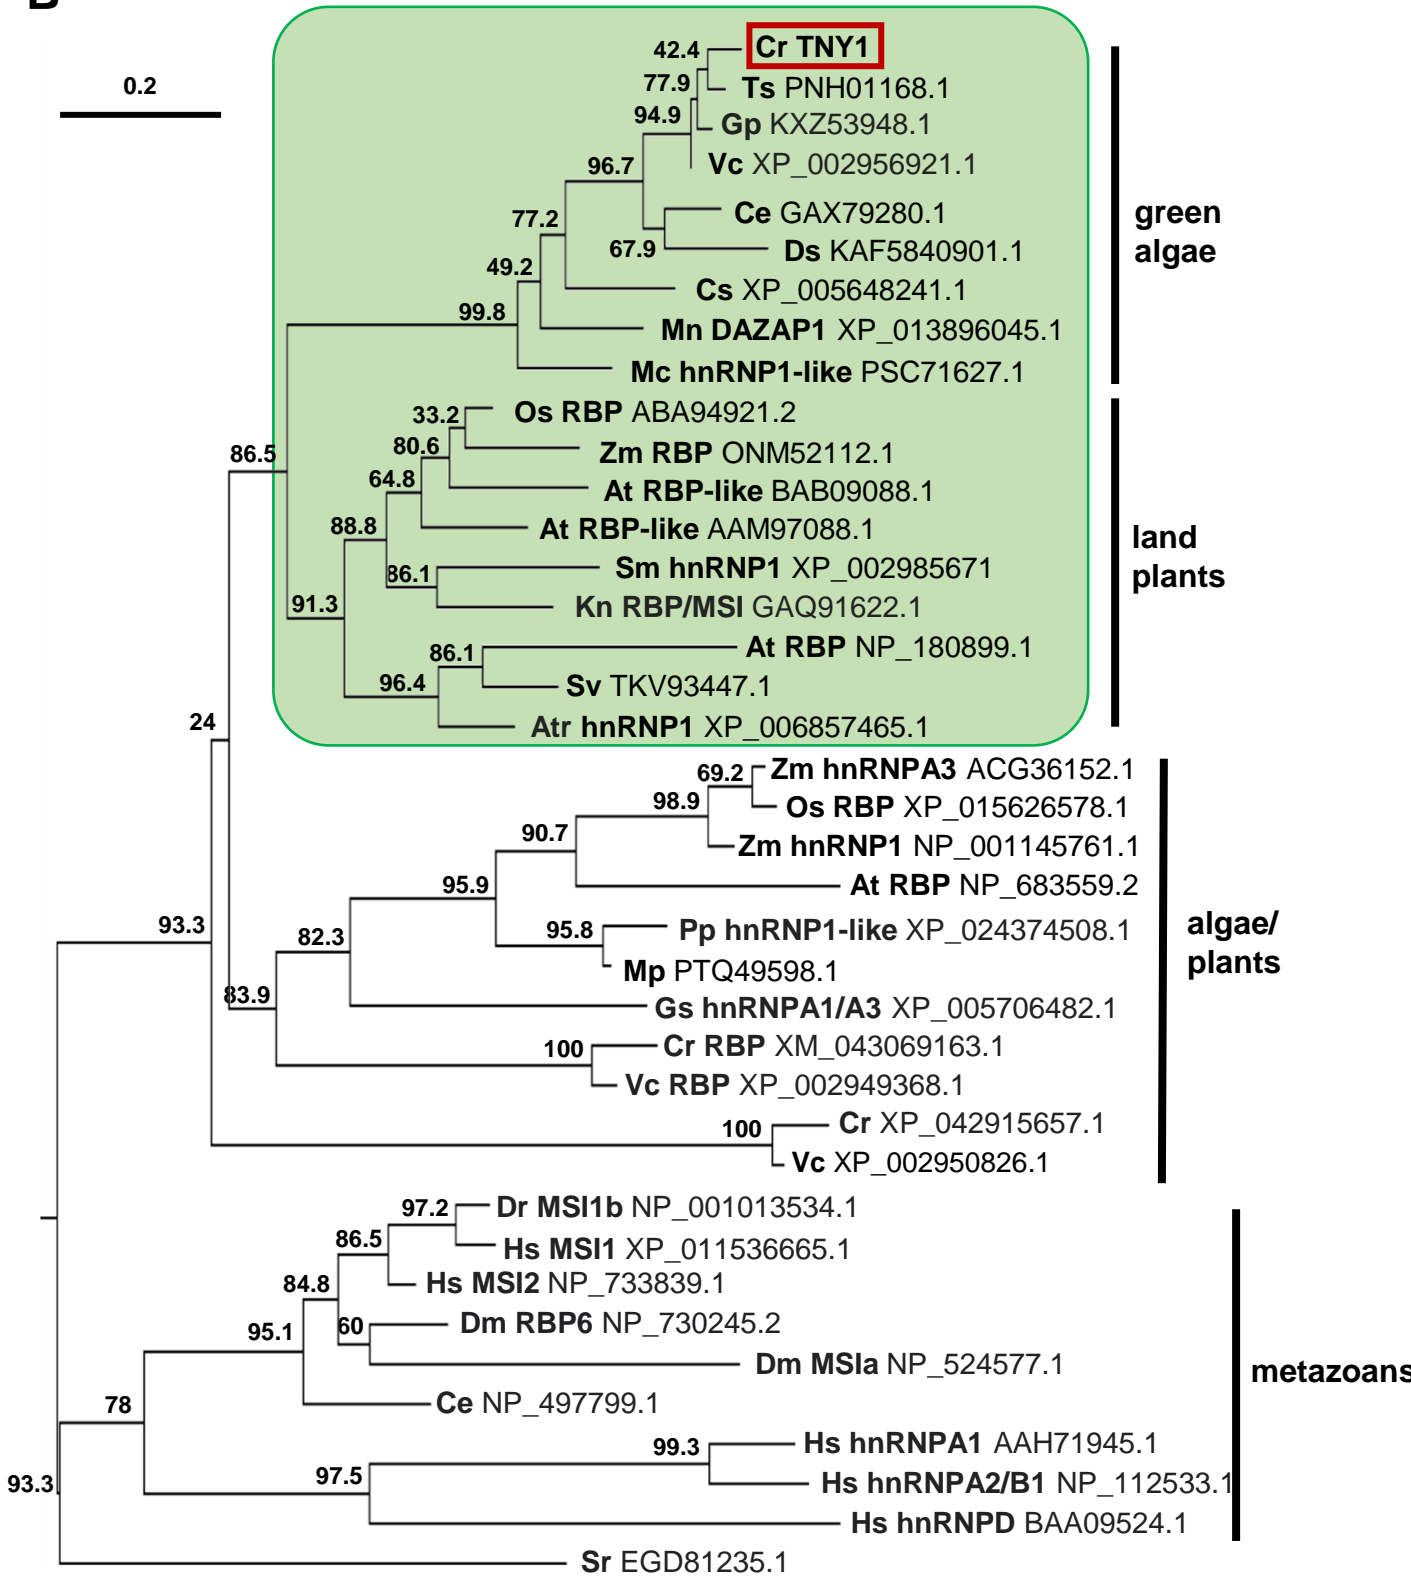

## Figure 3

A

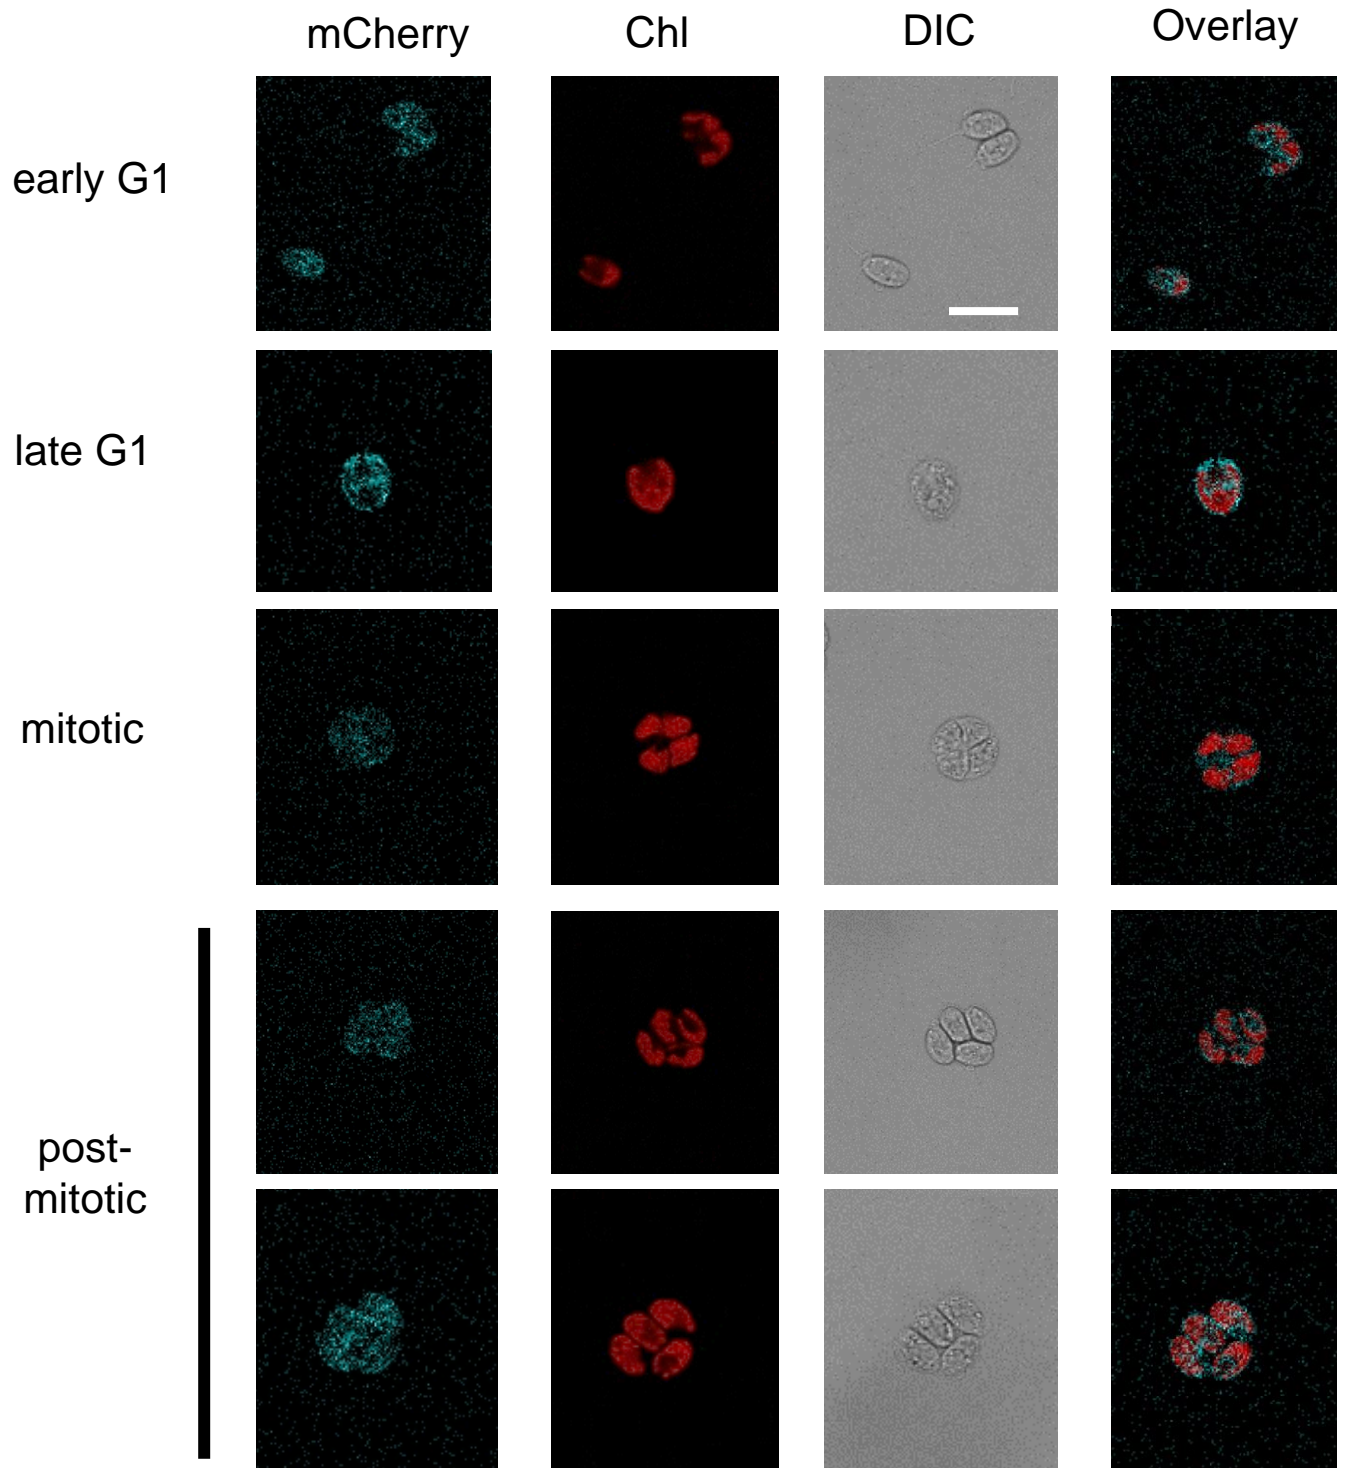

## Figure 3

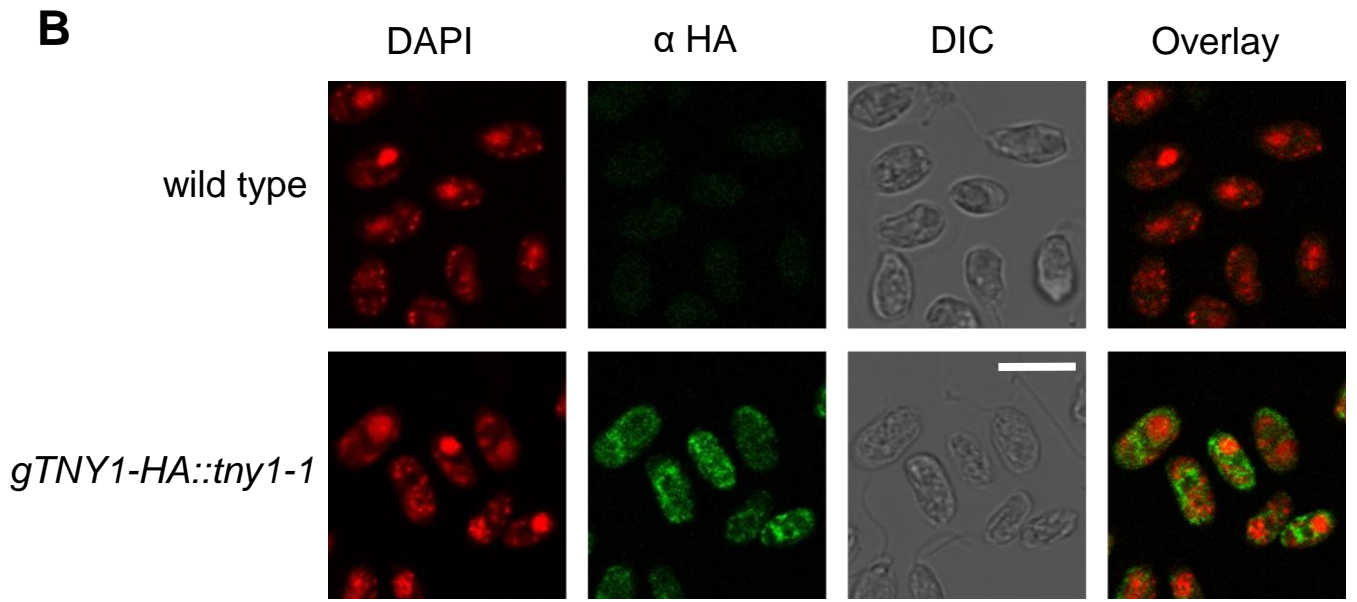

## Figure 4

A

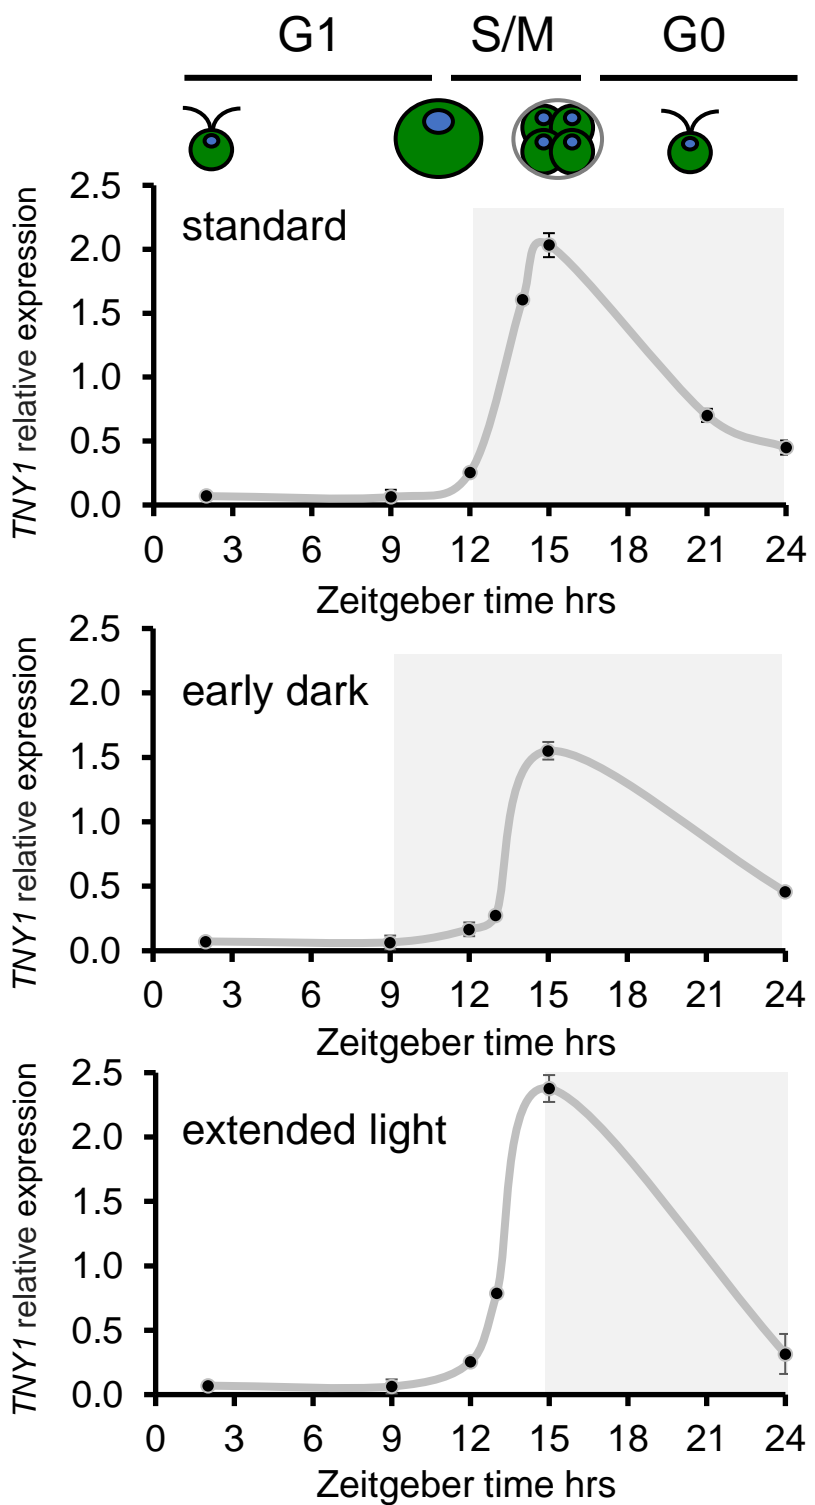

## Figure 4

**B**

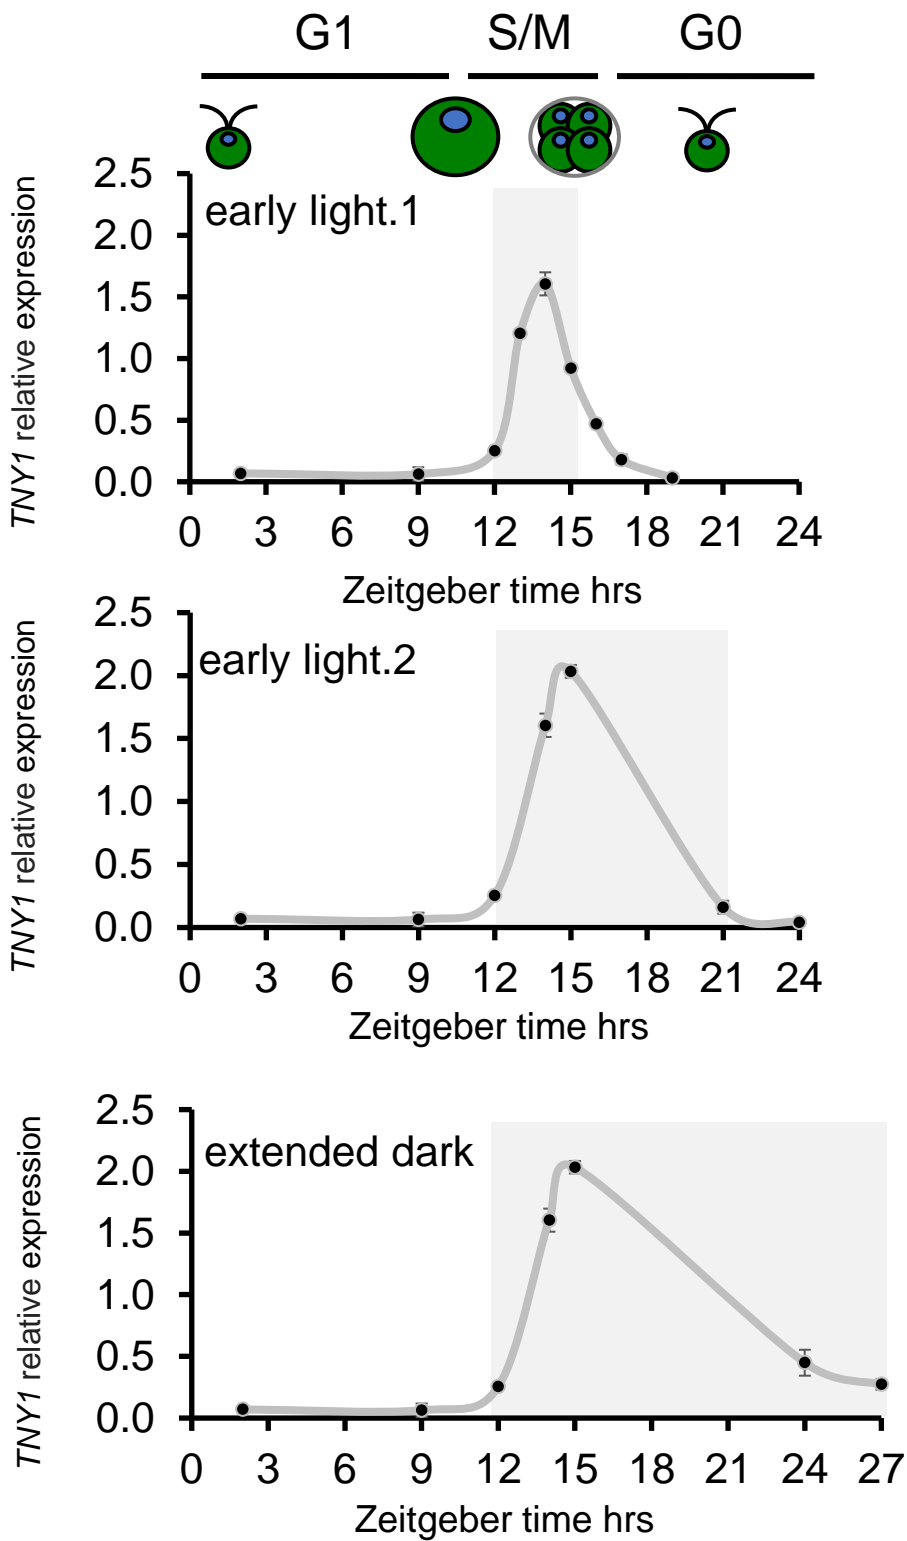



## Figure 4

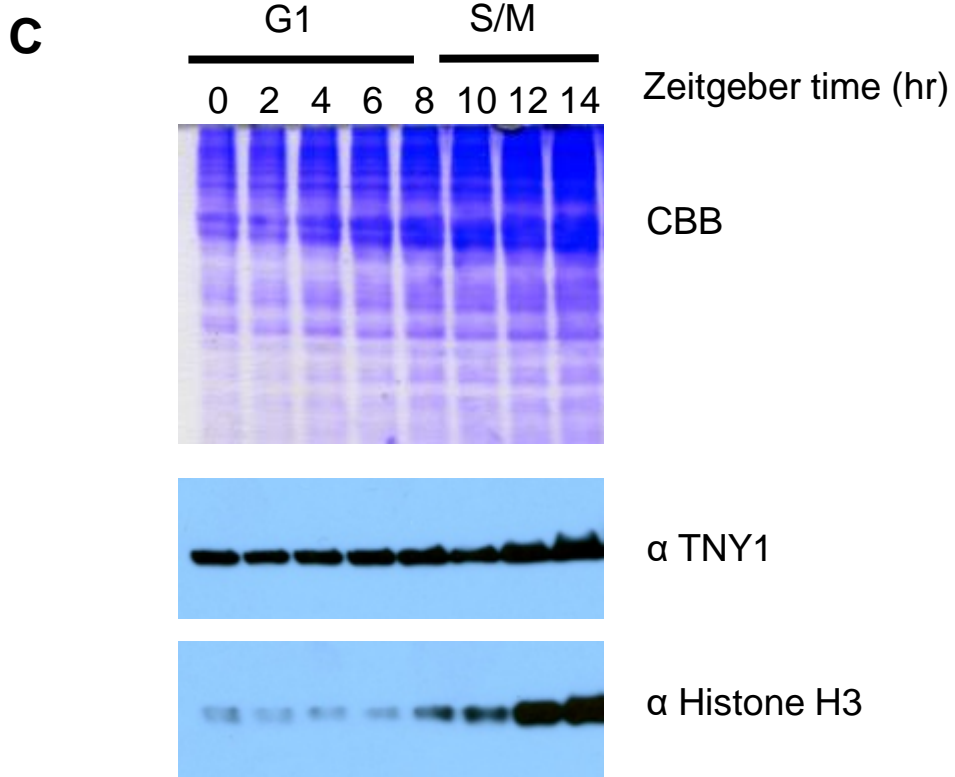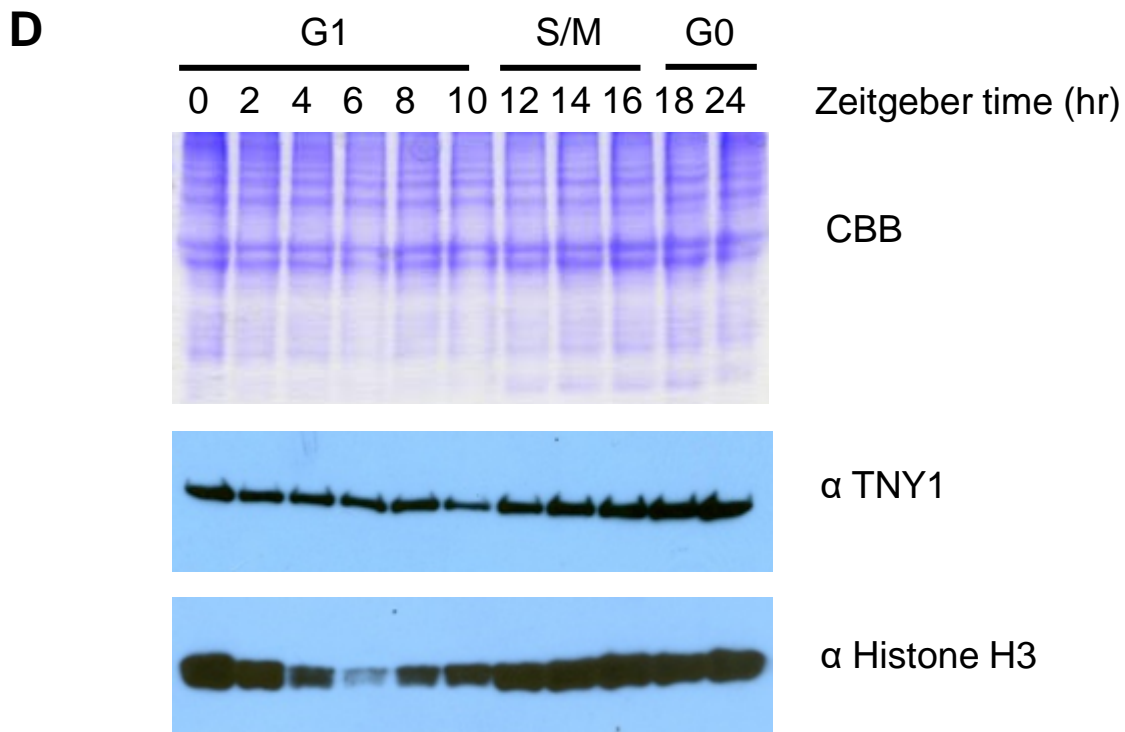

## Figure 4

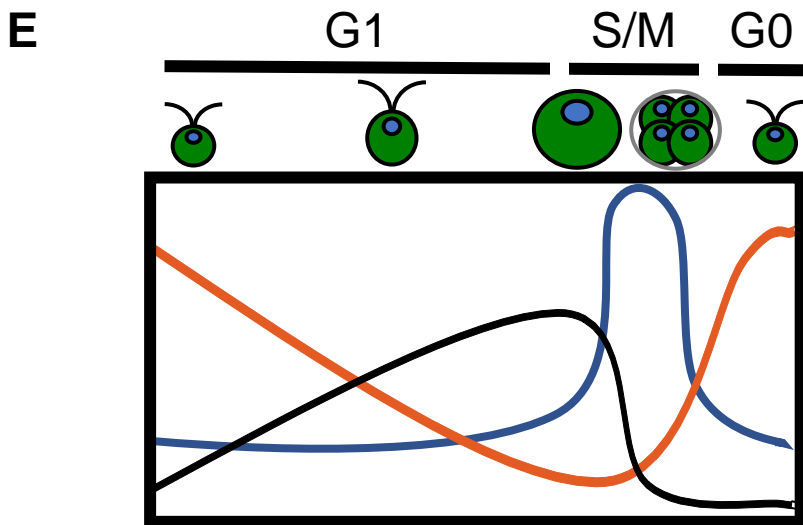

Cell Size  
TNY1 amount per cell  
TNY1 concentration

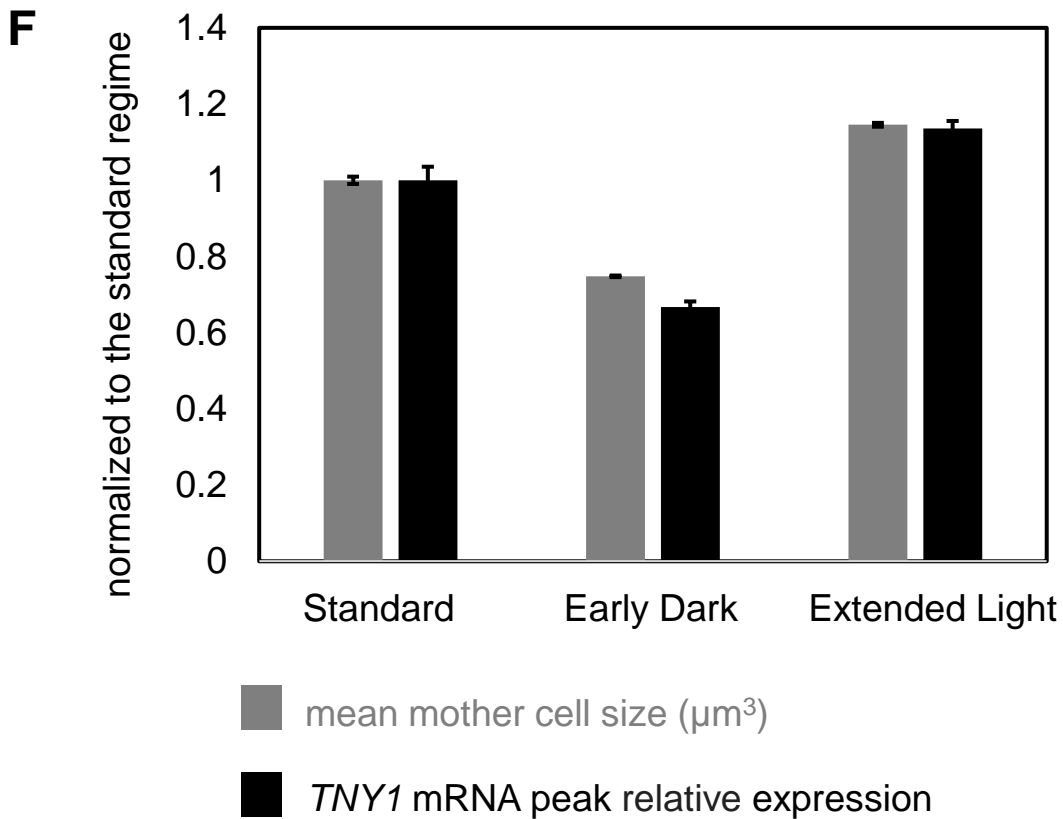

# Figure 4

## G

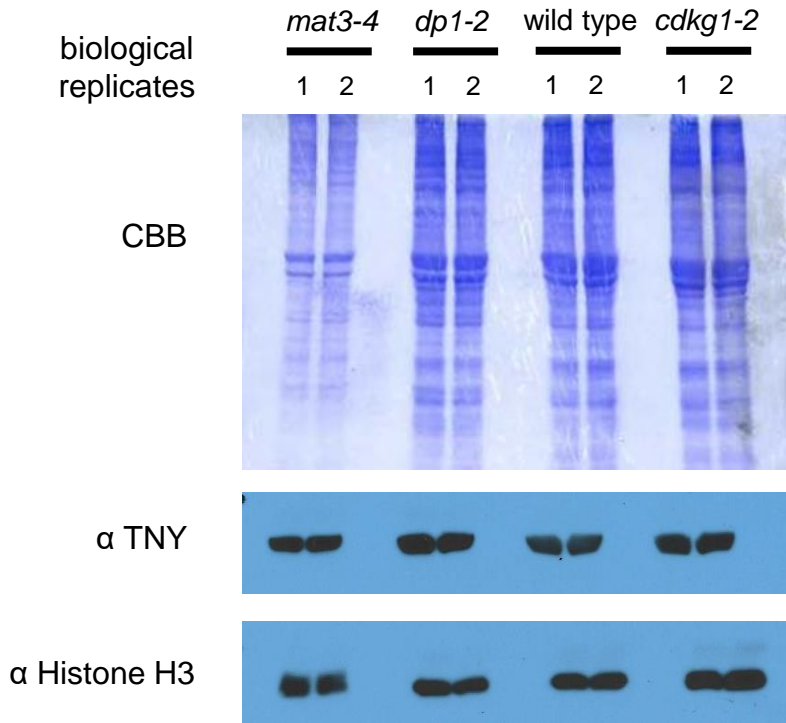

## Figure 5

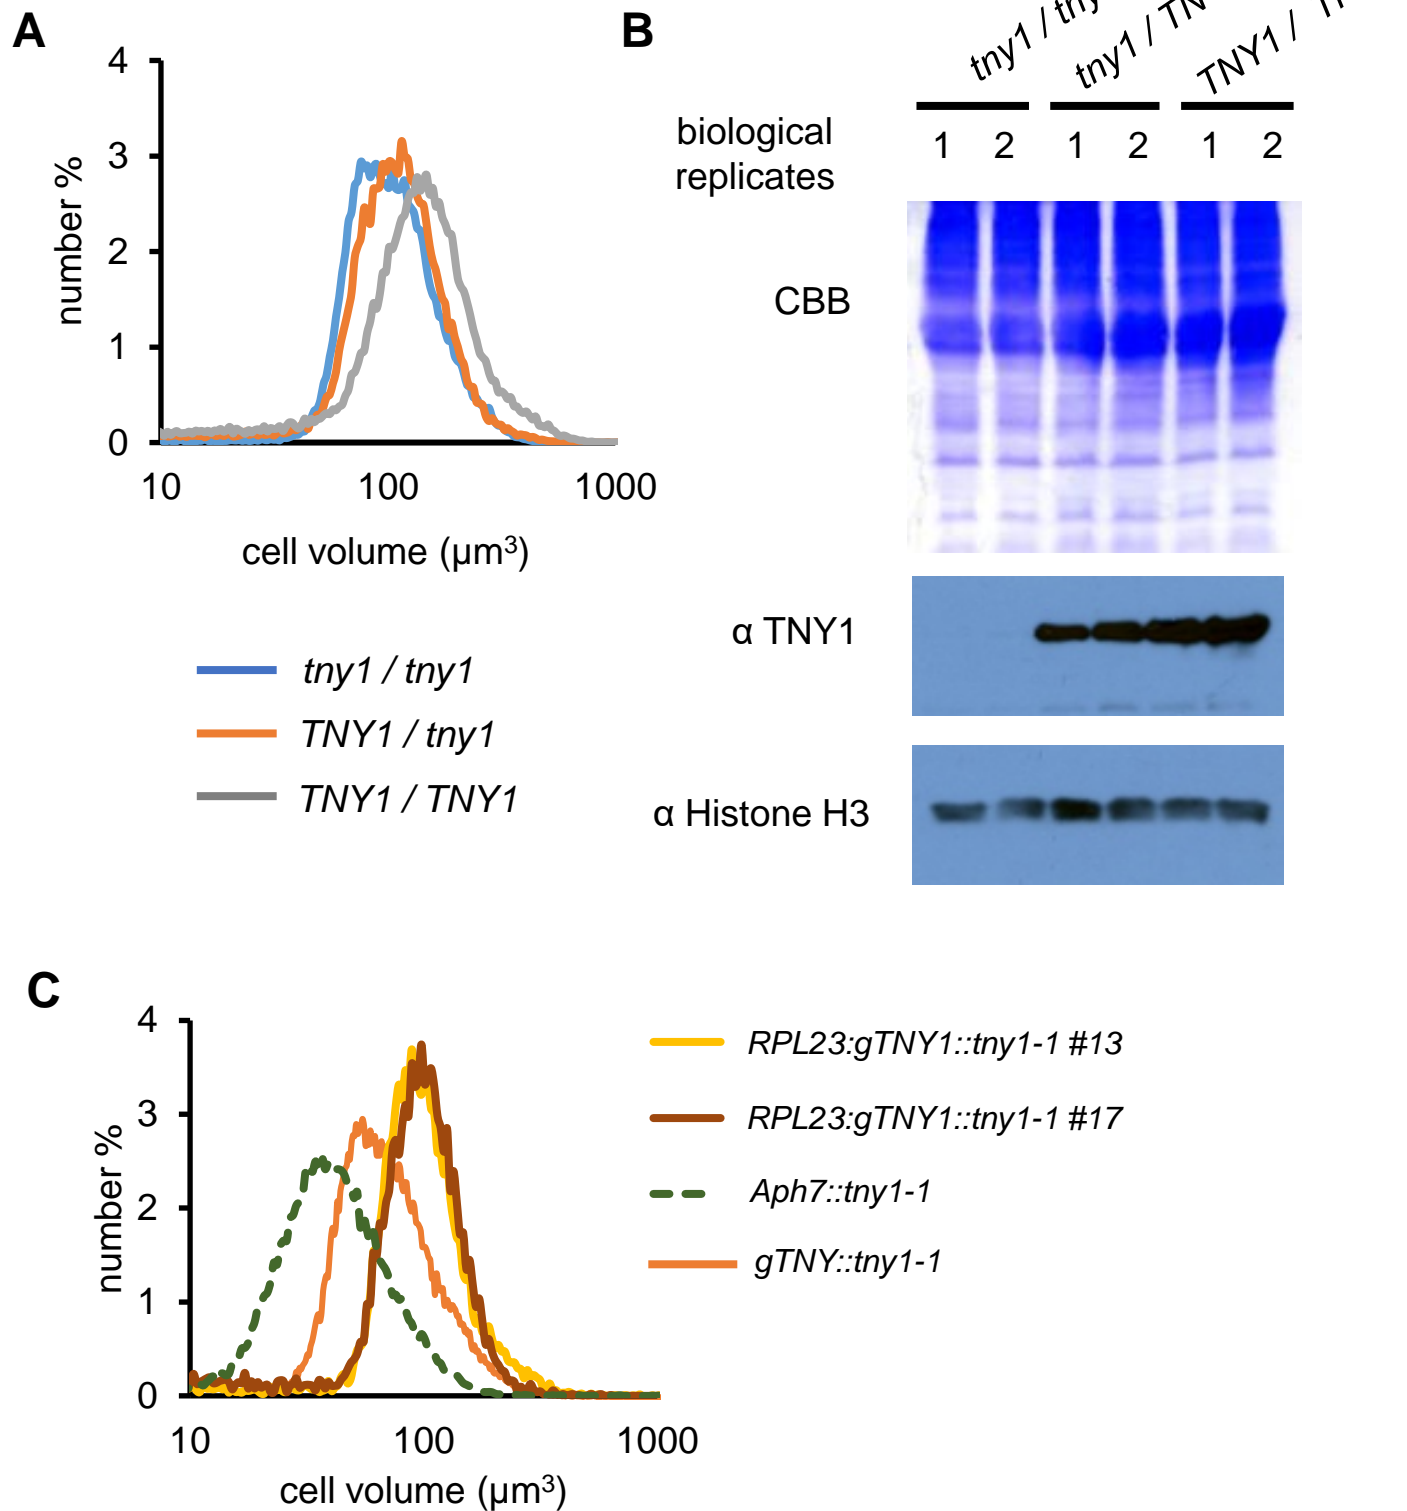

## Figure 6

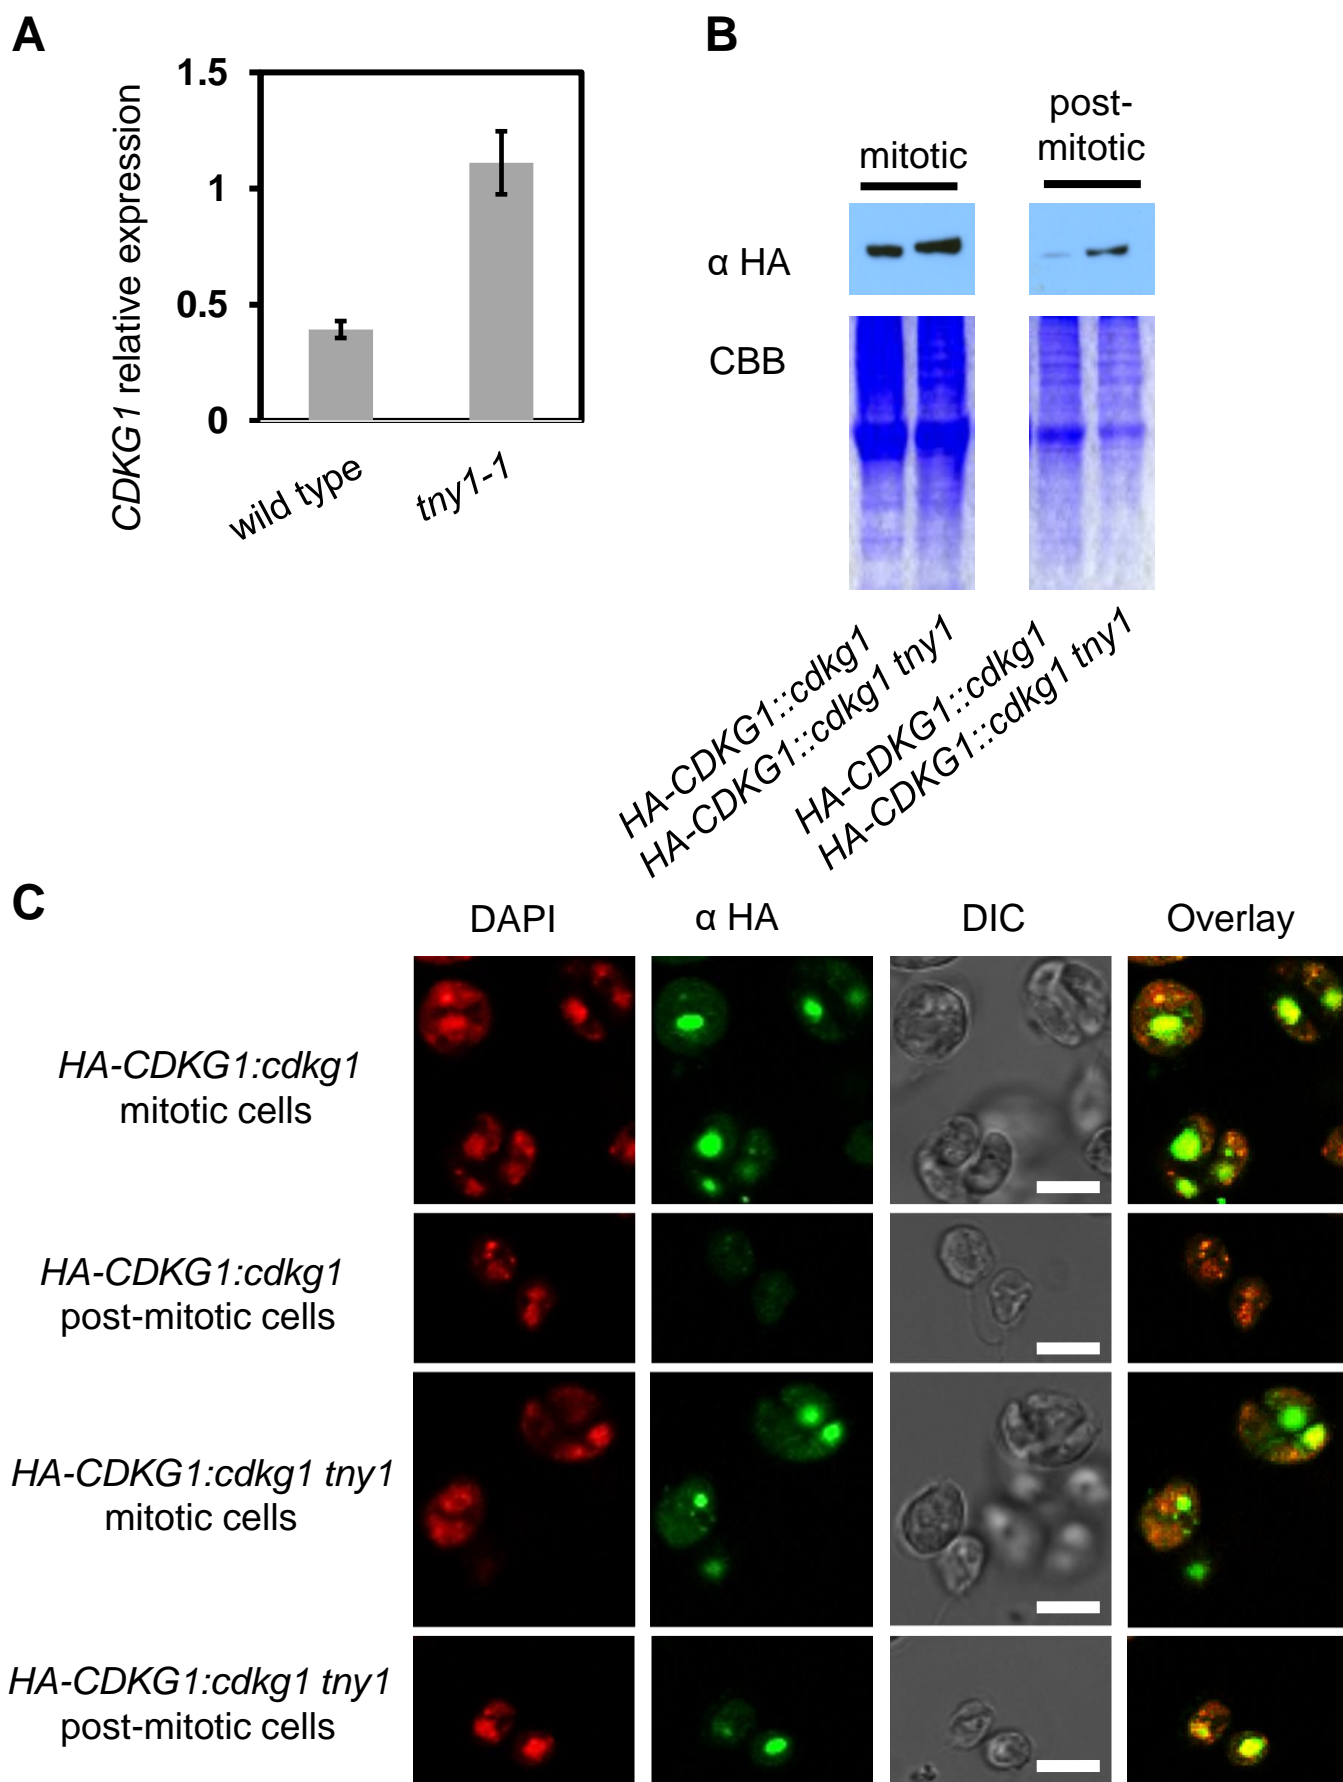

## Figure 6

**D**

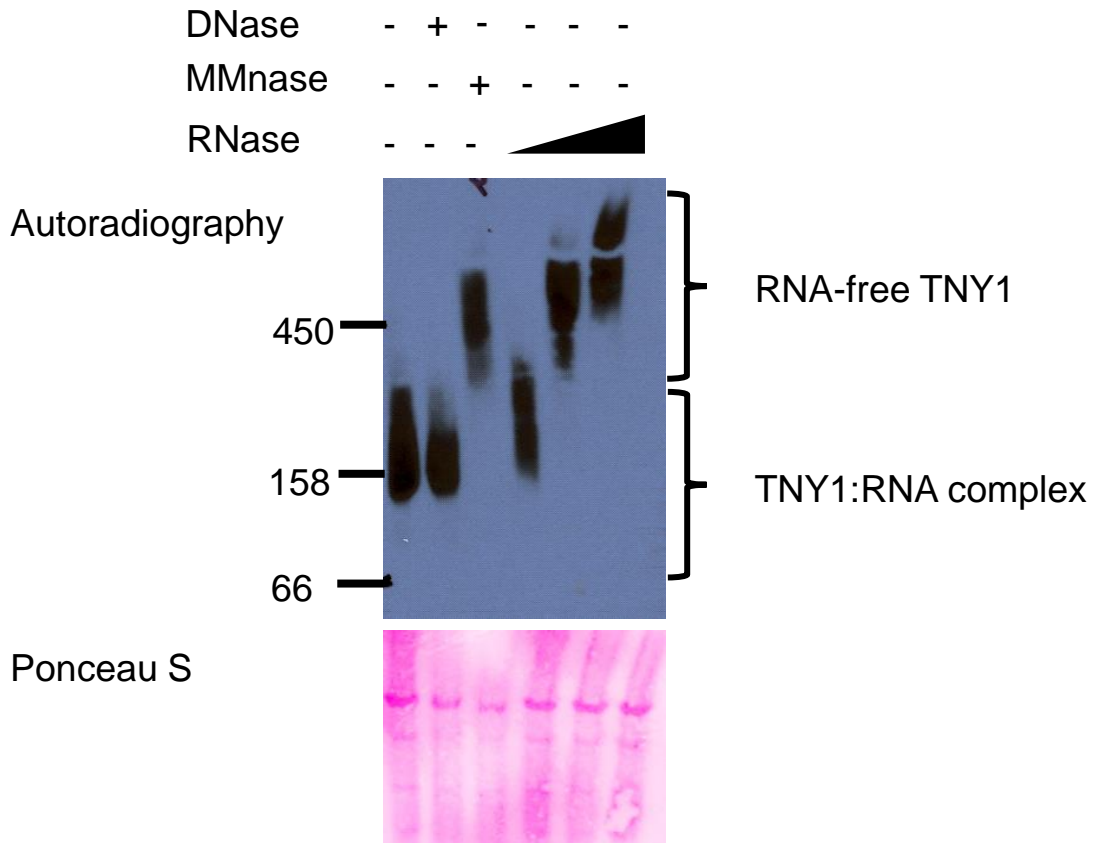

## Figure 6

E

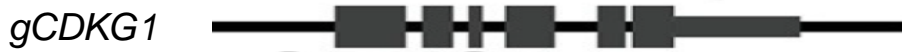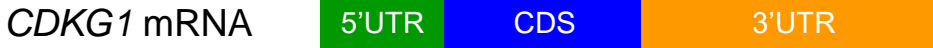

*In vitro* transcribed and <sup>32</sup>P labeled mRNA

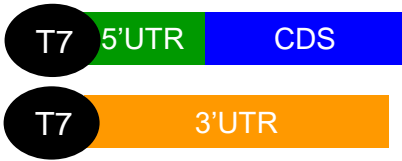

*In vitro* expressed GST-TNY1

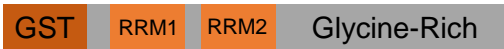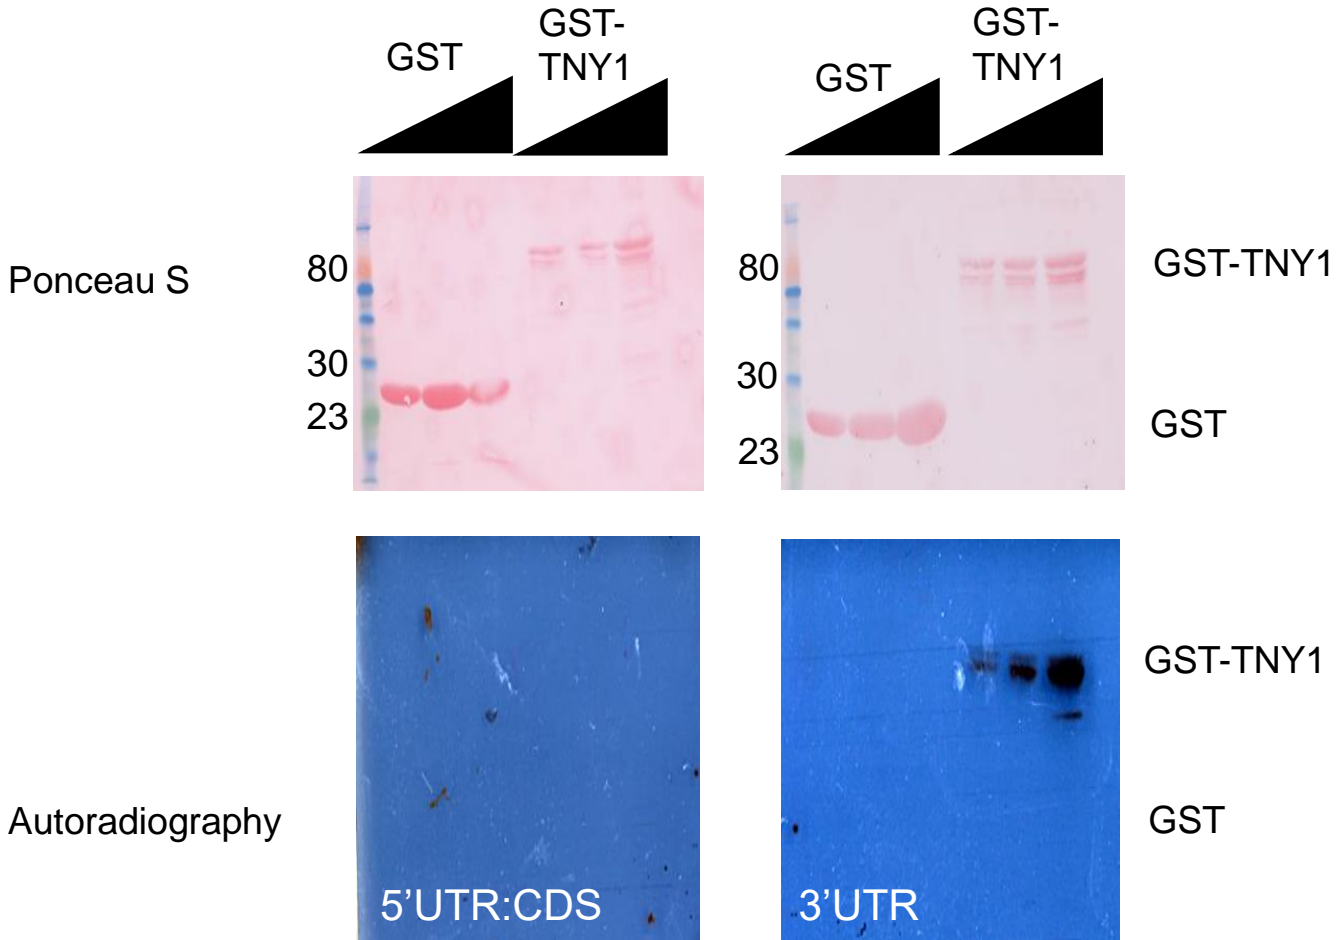

# Figure 7

A

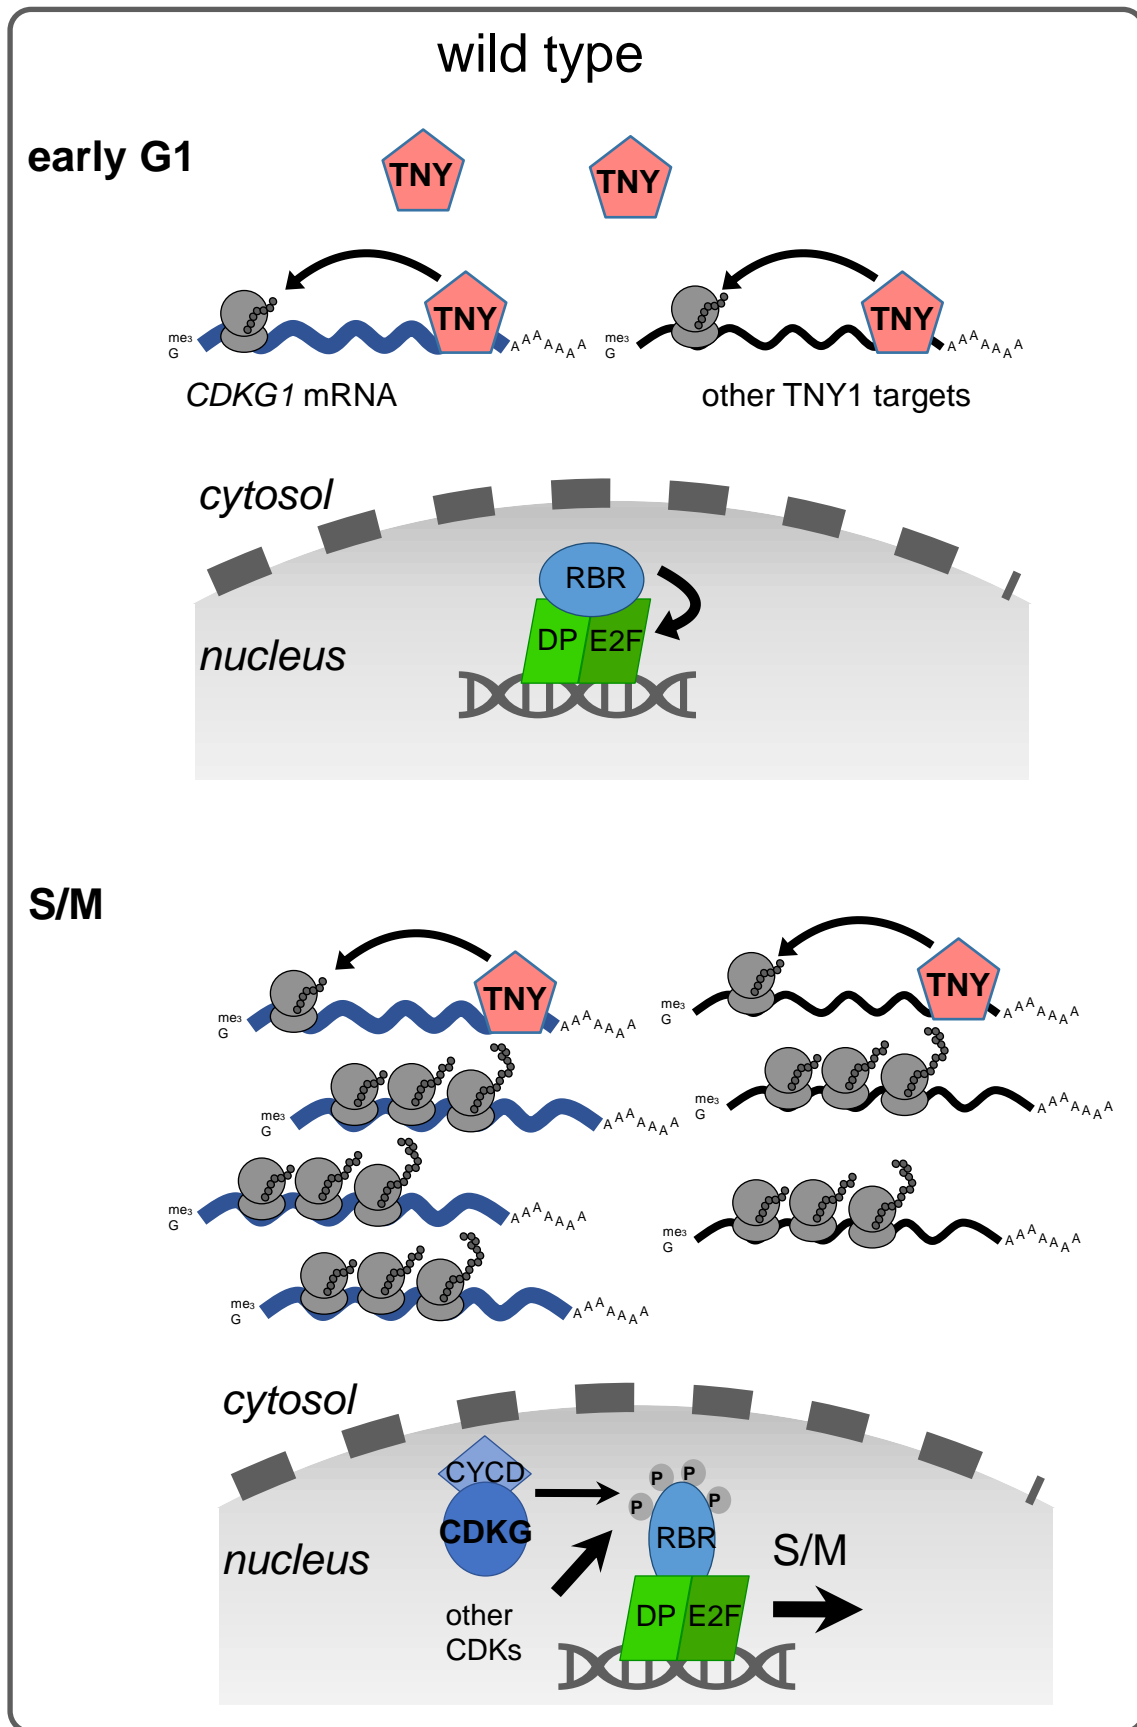



# Figure 7

B

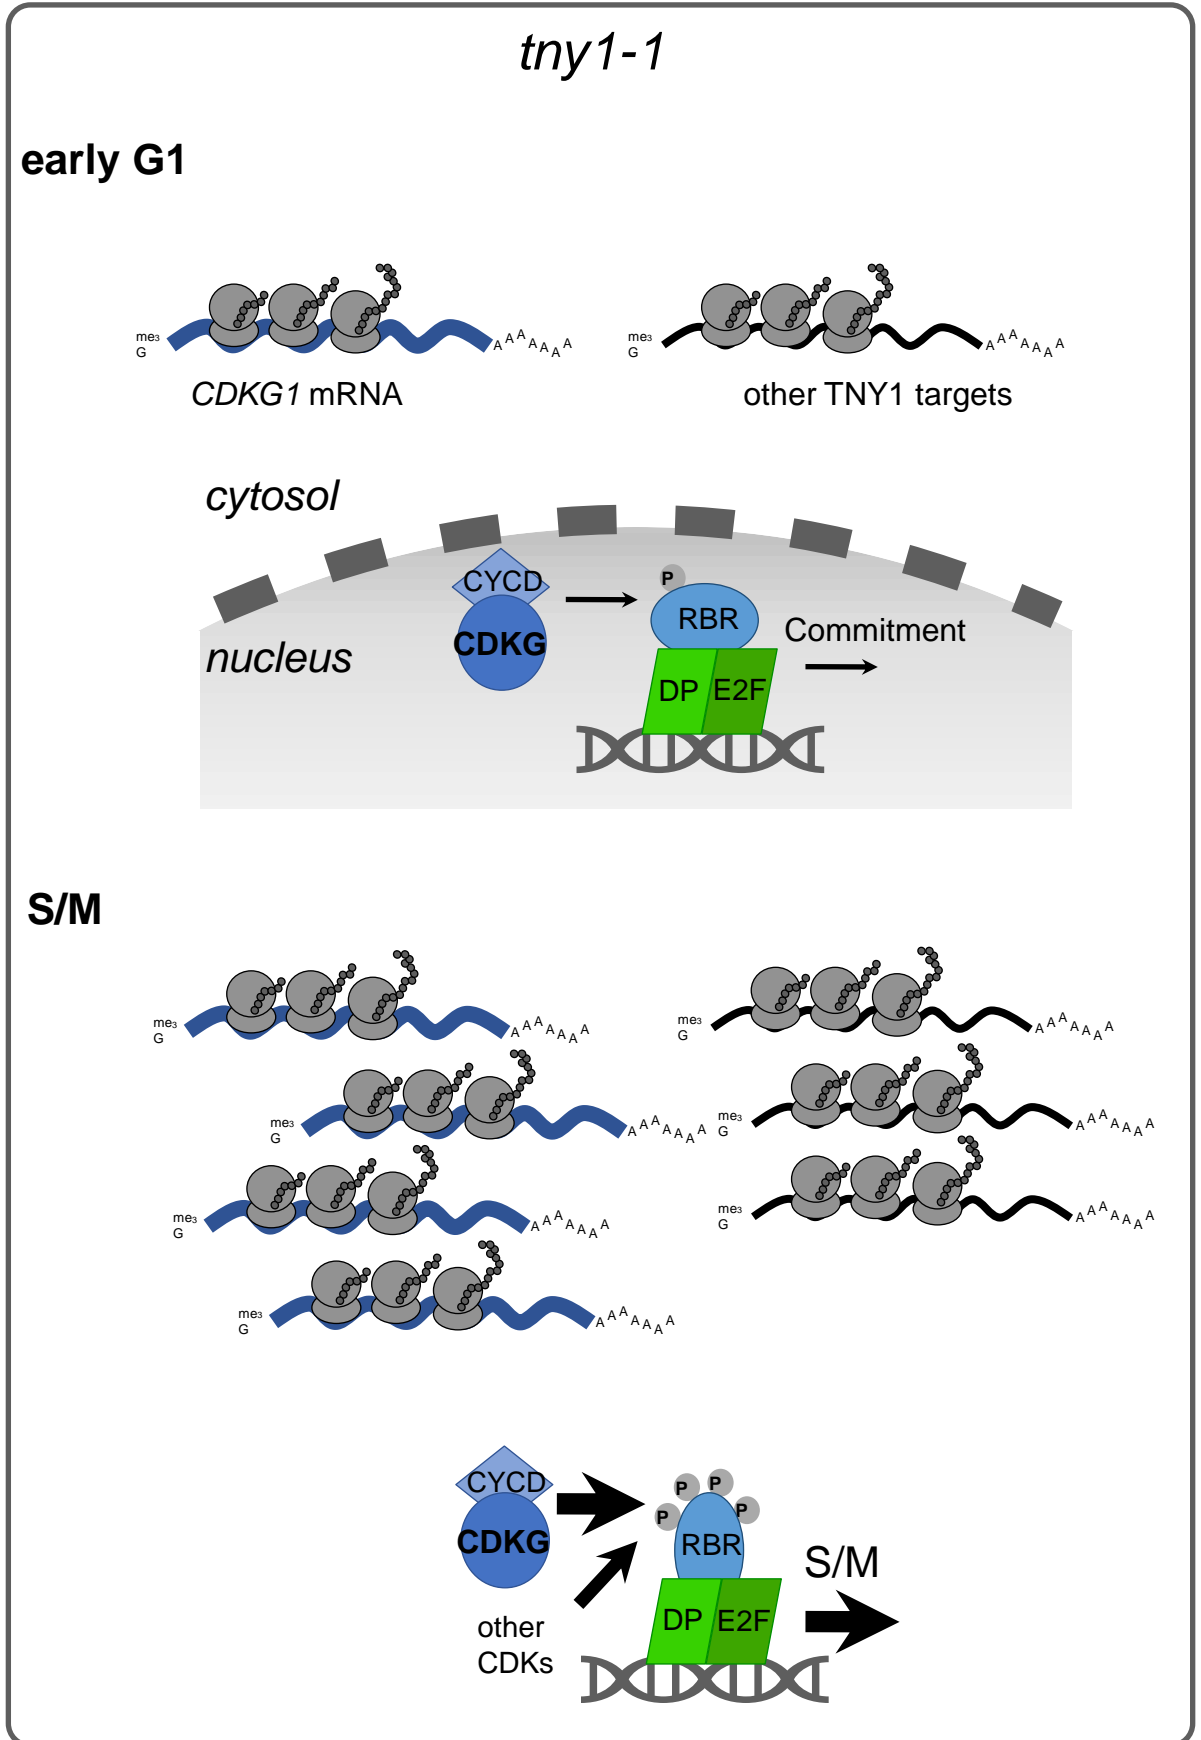

## Figure S1

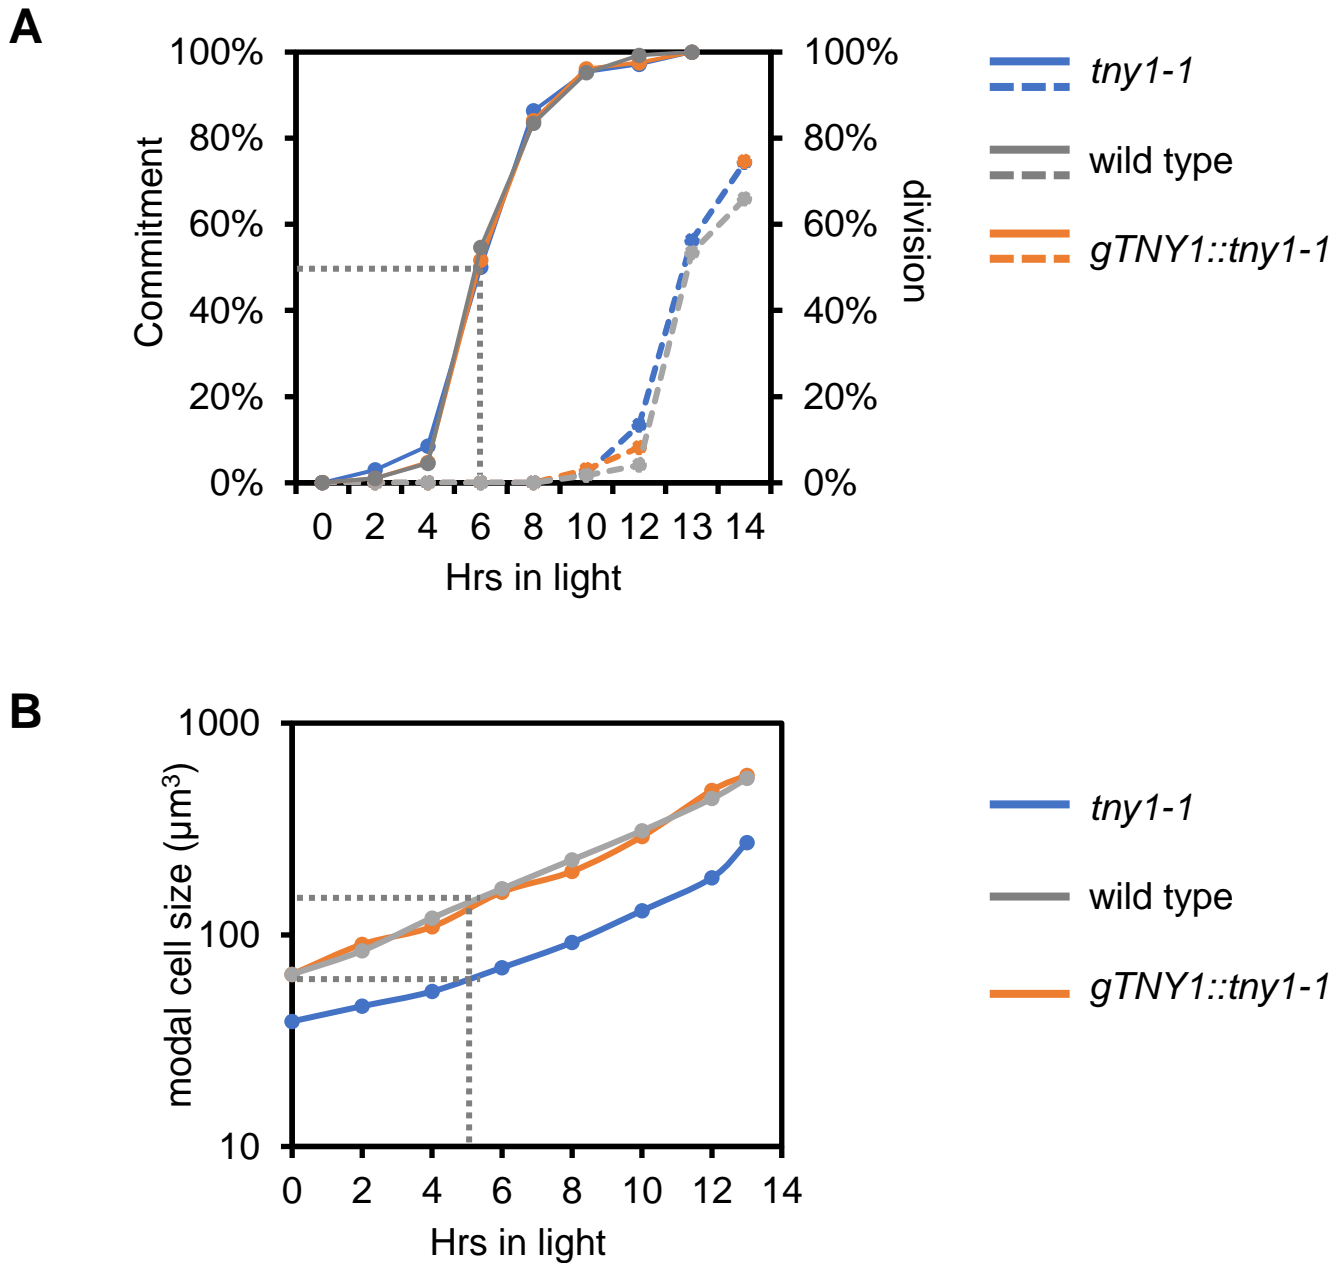

# Figure S1

**C**

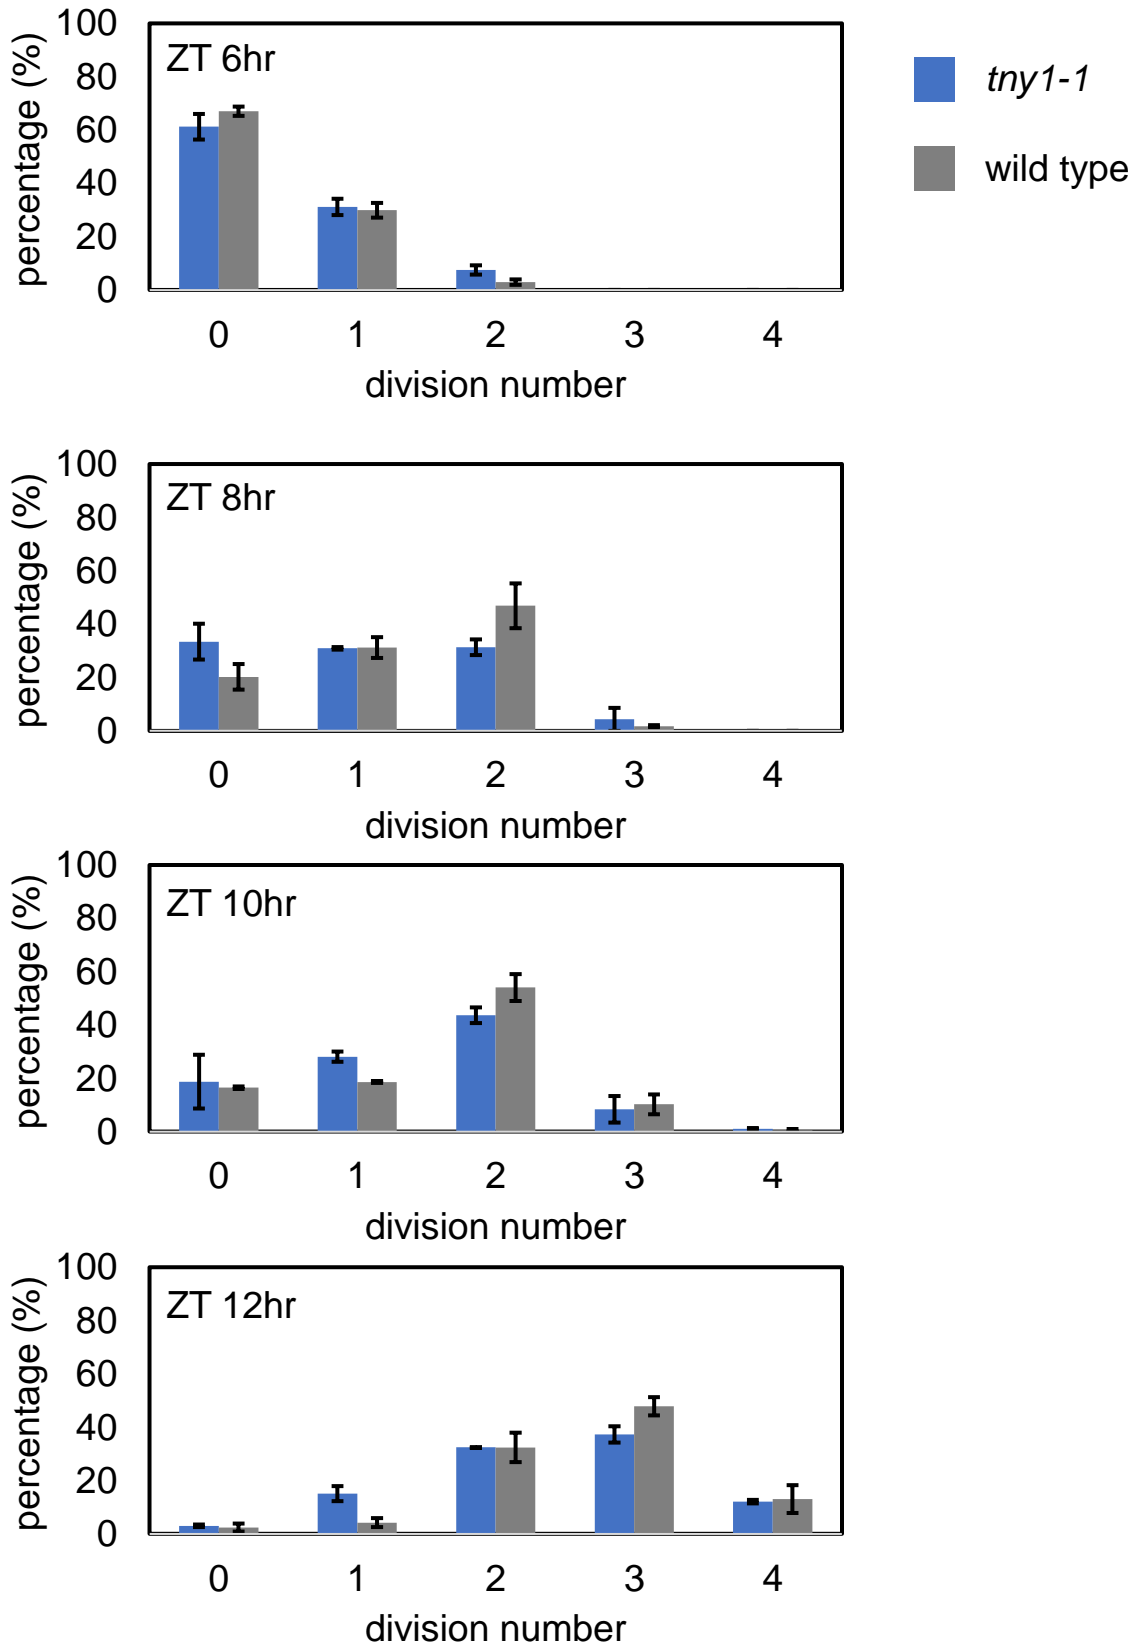

## Figure S1

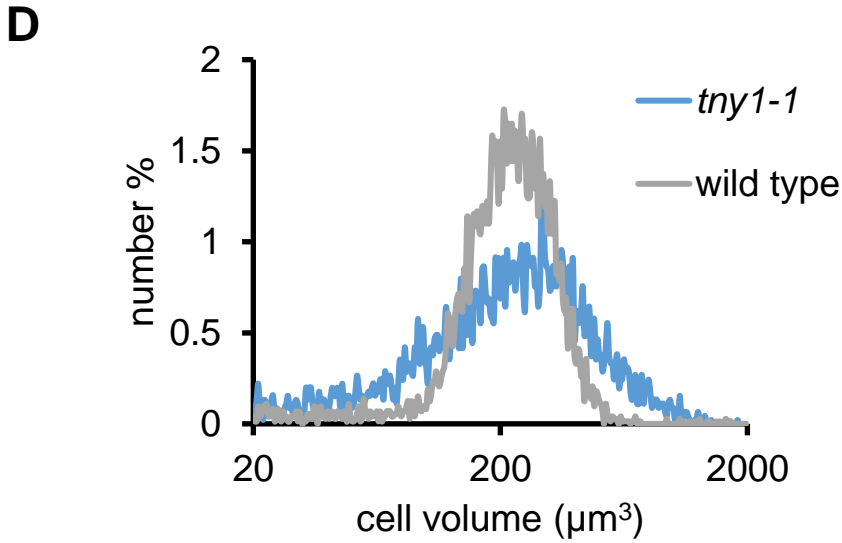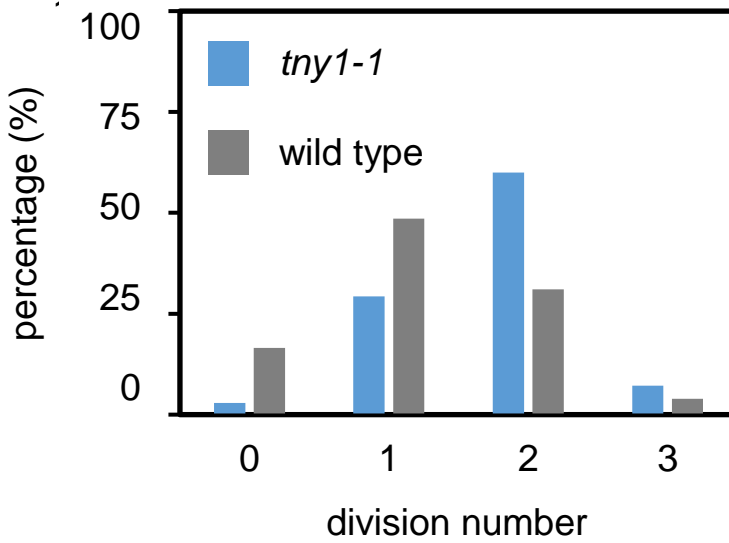

|                         | wild type                | <i>tny1-1</i>            |
|-------------------------|--------------------------|--------------------------|
| modal mother cell size  | $\sim 230 \mu\text{m}^3$ | $\sim 230 \mu\text{m}^3$ |
| average division number | 1.4                      | 2.8                      |
| daughter cell size      | $\sim 80 \mu\text{m}^3$  | $\sim 50 \mu\text{m}^3$  |

# Figure S1

**E**

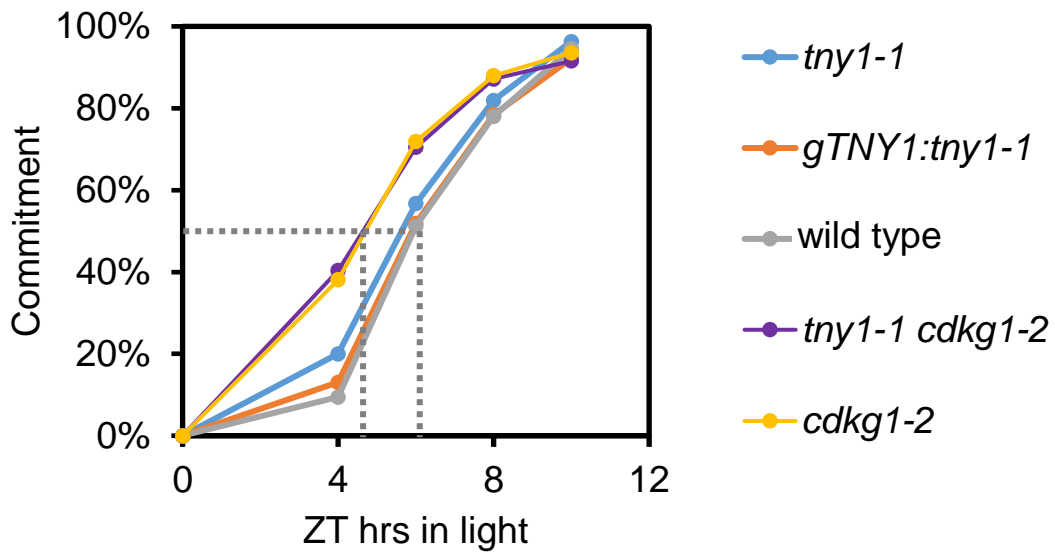

**F**

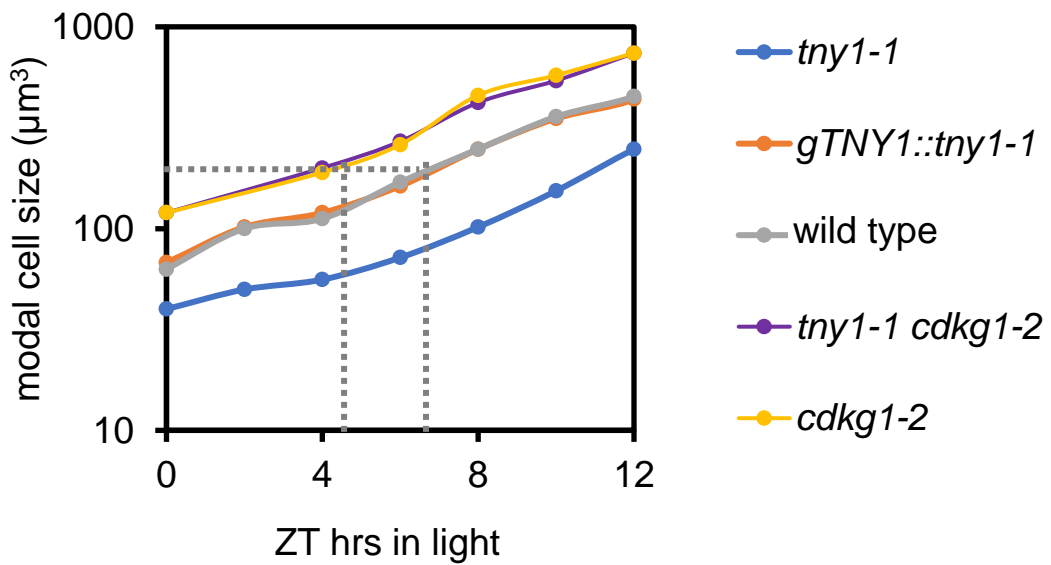

# Figure S1

**G**

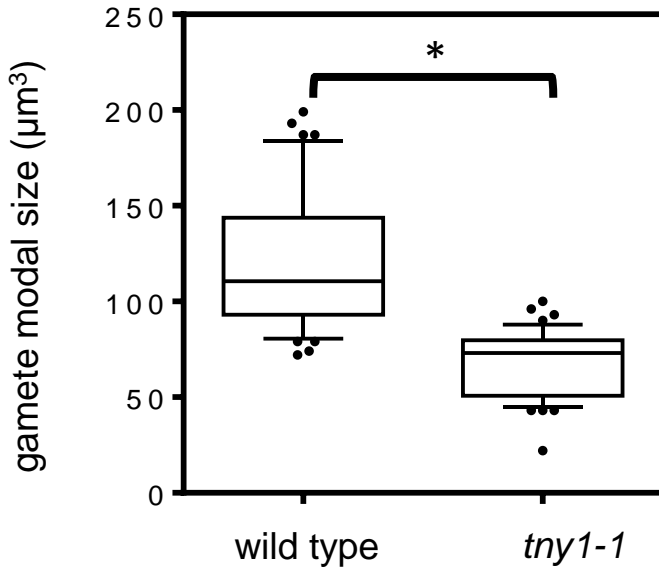

**H**

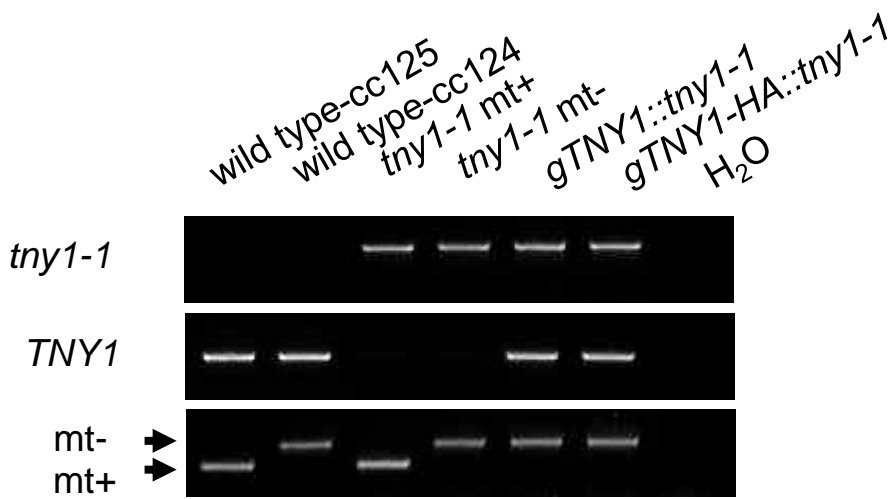

**I**

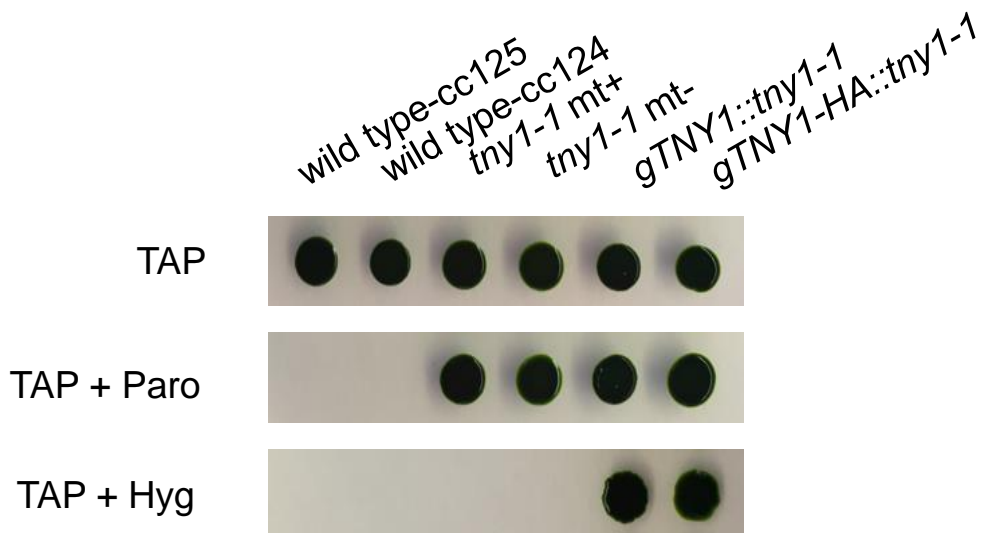

# Figure S2

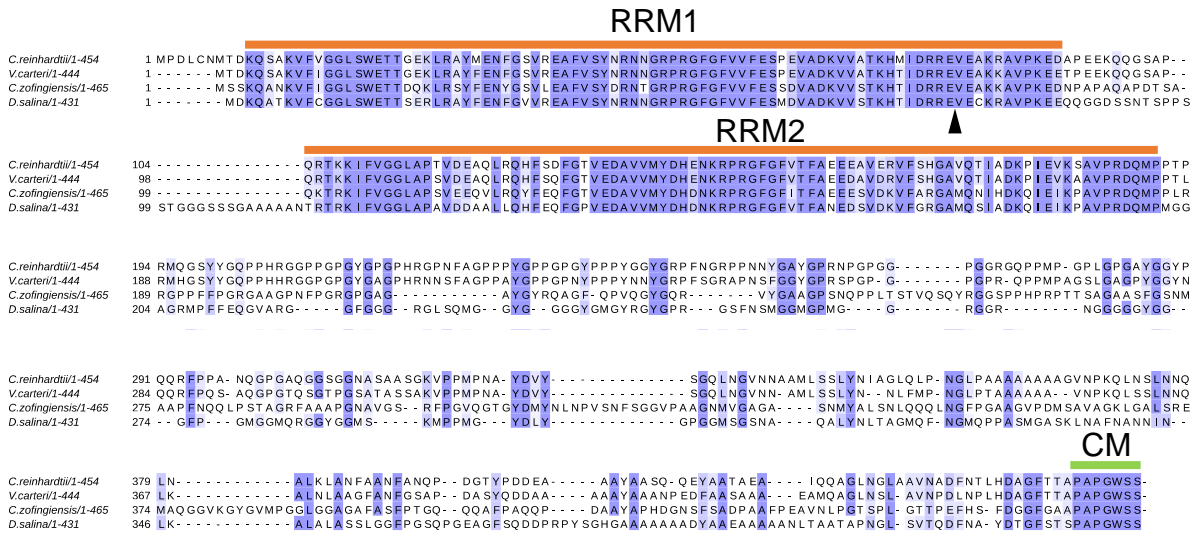

# Figure S3

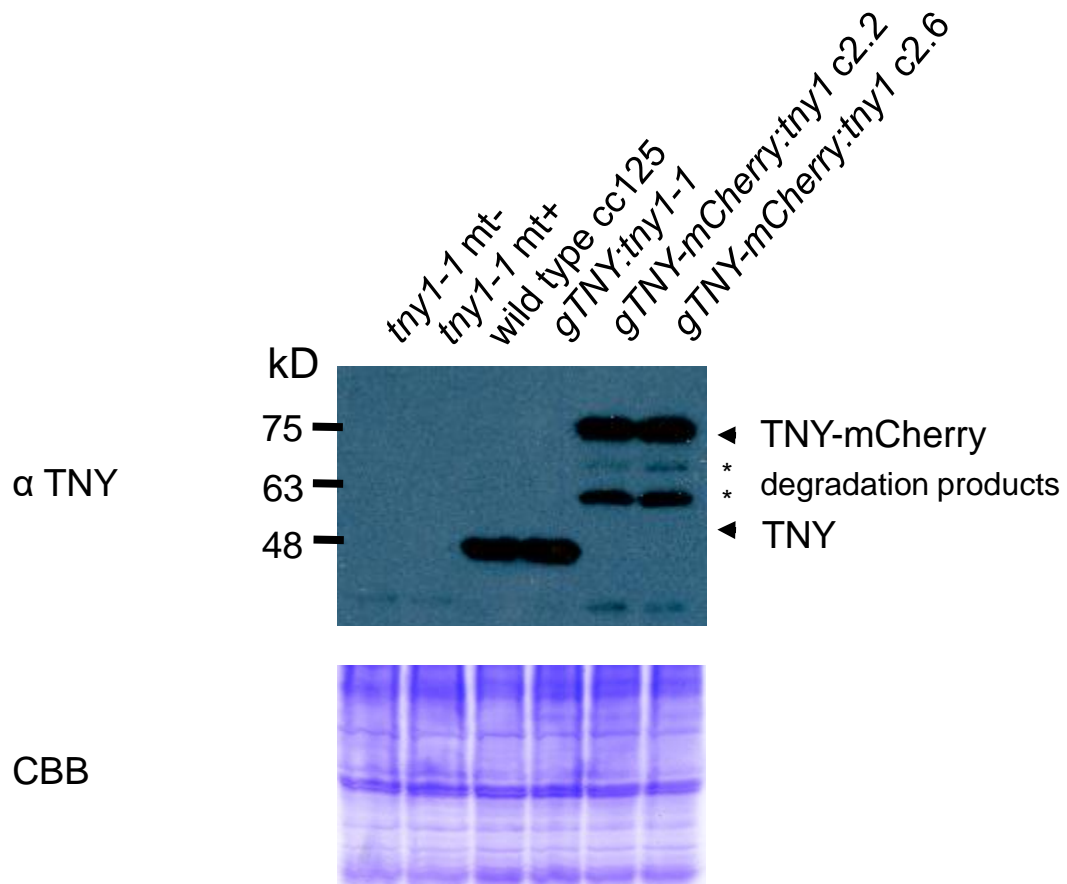



## Figure S4

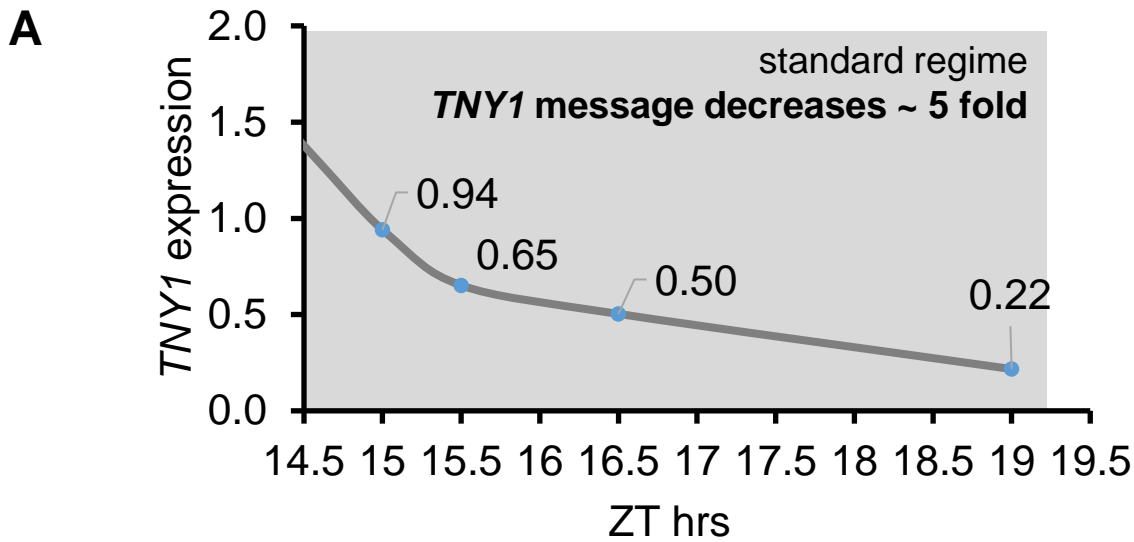

### Total biomass change ~5%

| ZT hr |       | cell concentration<br>(cells/mL) | mean size<br>( $\mu\text{m}^3$ ) | biomass<br>( $\mu\text{m}^3 \cdot \text{cells/mL}$ ) | biomass average<br>( $\mu\text{m}^3 \cdot \text{cells/mL}$ ) |
|-------|-------|----------------------------------|----------------------------------|------------------------------------------------------|--------------------------------------------------------------|
| 15    | rep 1 | 93236                            | 587                              | 4975412                                              | 5364296                                                      |
|       | rep 2 | 103070                           | 614                              | 5753180                                              |                                                              |
| 15.5  | rep 1 | 103763                           | 568                              | 5357944                                              | 5216278                                                      |
|       | rep 2 | 100397                           | 556                              | 5074612                                              |                                                              |
| 16.5  | rep 1 | 132132                           | 475                              | 5705700                                              | 5570020                                                      |
|       | rep 2 | 134332                           | 445                              | 5434340                                              |                                                              |
| 19    | rep 1 | 710050                           | 93                               | 6003150                                              | 5887367                                                      |
|       | rep 2 | 697664                           | 91                               | 5771584                                              |                                                              |

## Figure S4

**B**

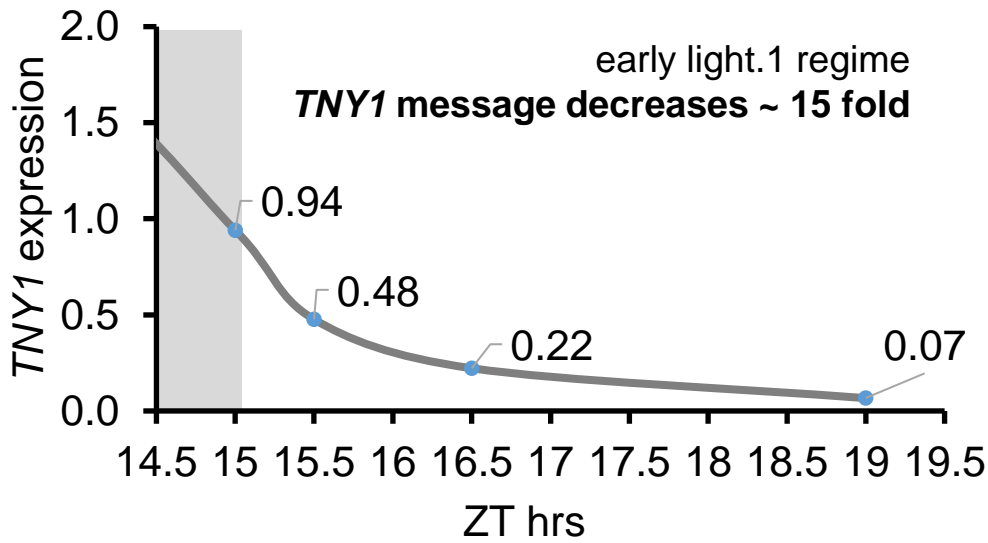

**Total biomass increase ~50% due to light or light-induced growth**

| ZT hr |       | cell concentration<br>(cells/mL) | mean size<br>( $\mu\text{m}^3$ ) | biomass<br>( $\mu\text{m}^3 \cdot \text{cells/mL}$ ) | biomass average<br>( $\mu\text{m}^3 \cdot \text{cells/mL}$ ) |
|-------|-------|----------------------------------|----------------------------------|------------------------------------------------------|--------------------------------------------------------------|
| 15    | rep 1 | 93236                            | 587                              | 4975412                                              | 5364296                                                      |
|       | rep 2 | 103070                           | 614                              | 5753180                                              |                                                              |
| 15.5  | rep 1 | 100309                           | 560                              | 5106640                                              | 5003295                                                      |
|       | rep 2 | 97999                            | 550                              | 4899950                                              |                                                              |
| 16.5  | rep 1 | 159346                           | 439                              | 6359354                                              | 6157172                                                      |
|       | rep 2 | 147202                           | 445                              | 5954990                                              |                                                              |
| 19    | rep 1 | 201300                           | 428                              | 7832400                                              | 7869601                                                      |
|       | rep 2 | 222442                           | 391                              | 7906802                                              |                                                              |

## Figure S4

**C**

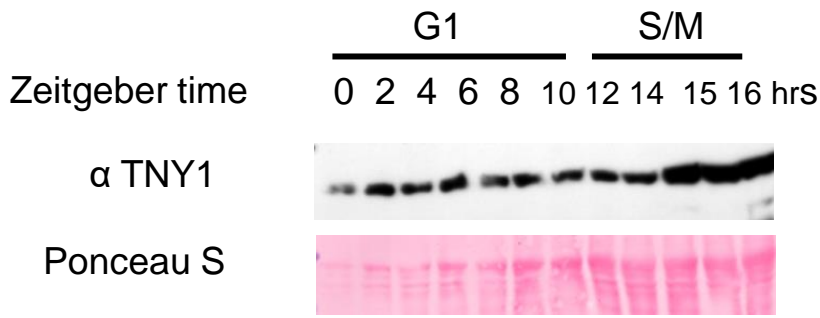

**D**

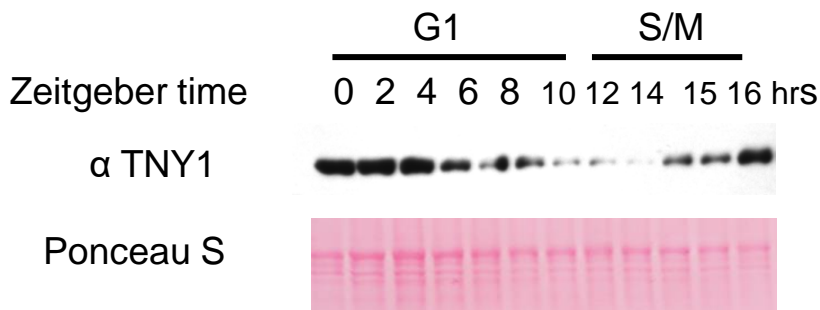

## Figure S4

**E**

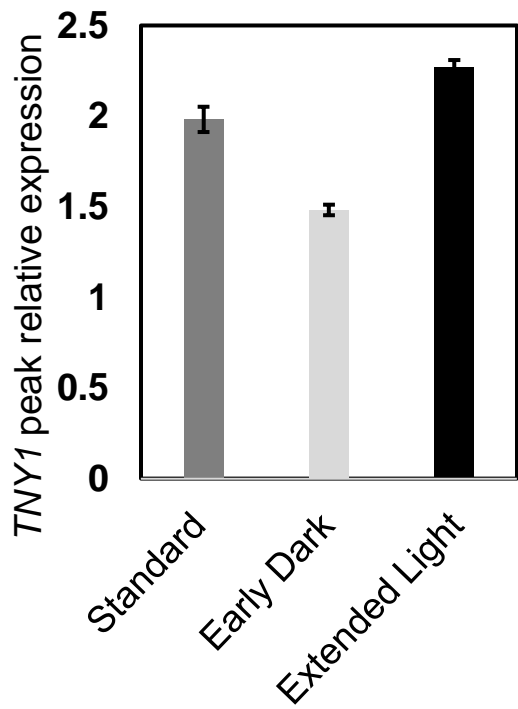

**F**

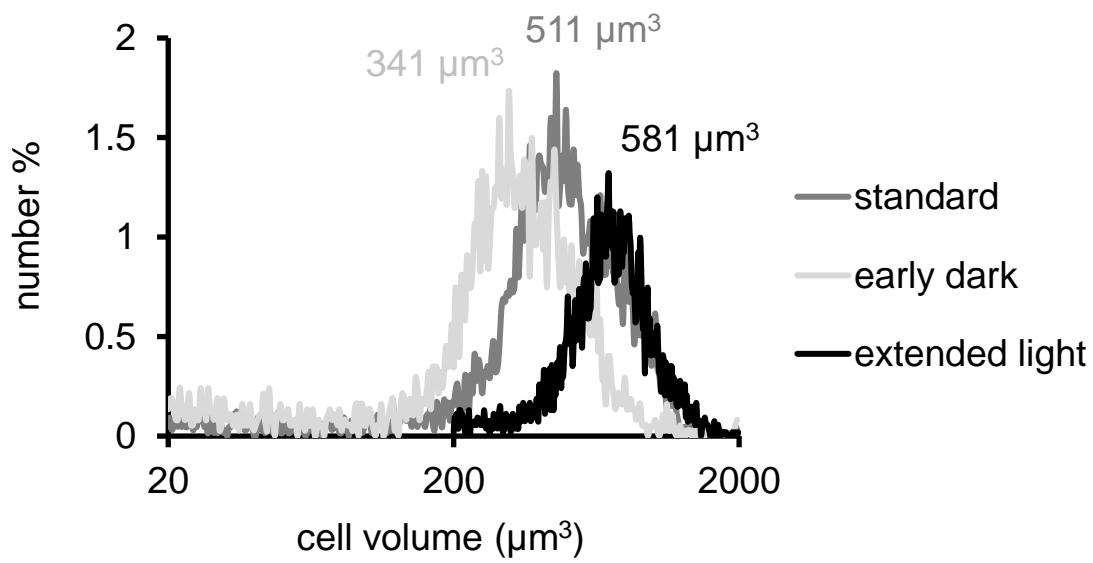

## Figure S5

**A**

| genotype           | <i>gTNY1::wild type</i> | <i>tny1-1</i> | <i>gTNY1::tny1-1</i> | wild type |
|--------------------|-------------------------|---------------|----------------------|-----------|
| colony #           | 25                      | 23            | 18                   | 26        |
| <i>TNY1</i> copy # | 2                       | 0             | 1                    | 1         |

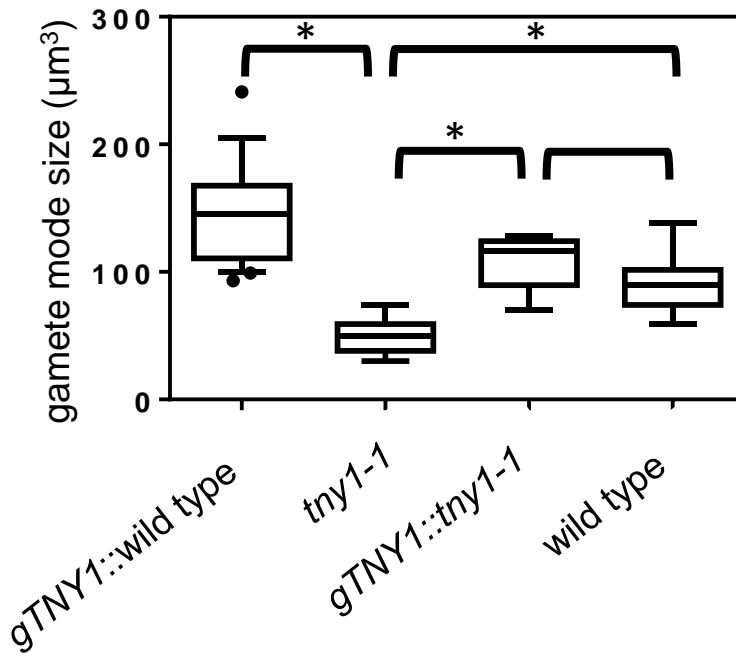

**B**

| genotype           | <i>gTNY1-HA::wild type</i> | <i>tny1-1</i> | <i>gTNY1-HA::tny1-1</i> | wild type |
|--------------------|----------------------------|---------------|-------------------------|-----------|
| colony #           | 23                         | 26            | 19                      | 19        |
| <i>TNY1</i> copy # | 2                          | 0             | 1                       | 1         |

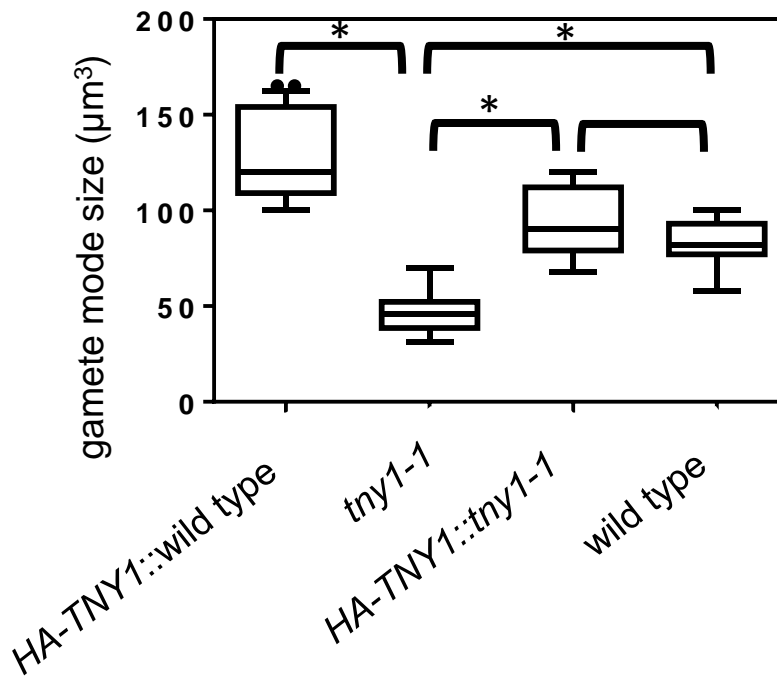

## Figure S5

**C**

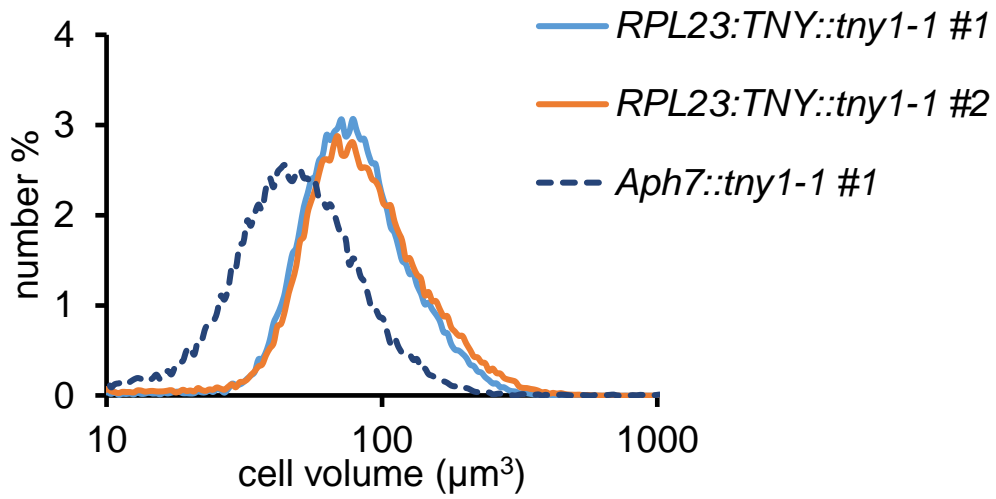

**D**

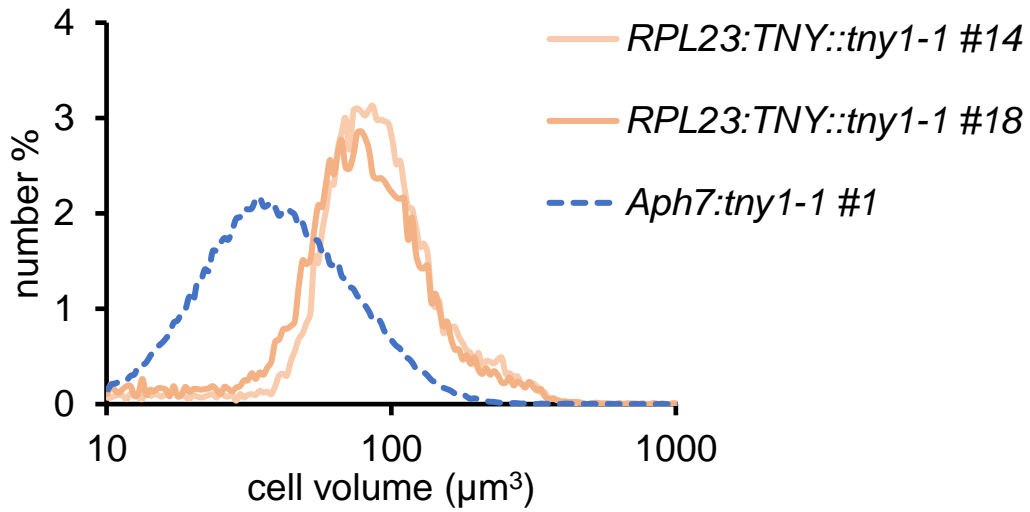

## Figure S5

**E**

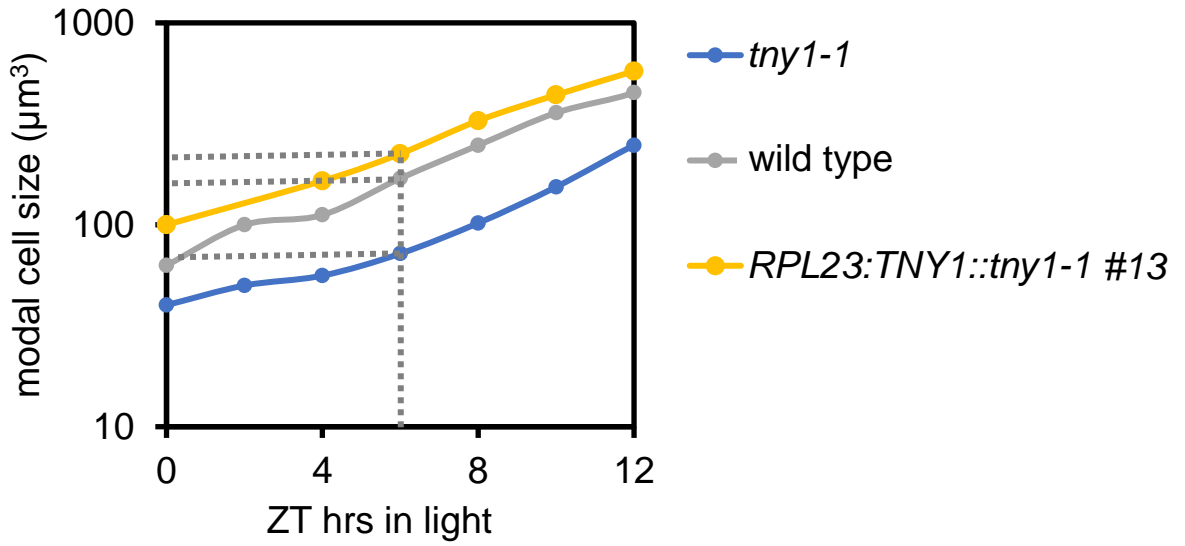

**F**

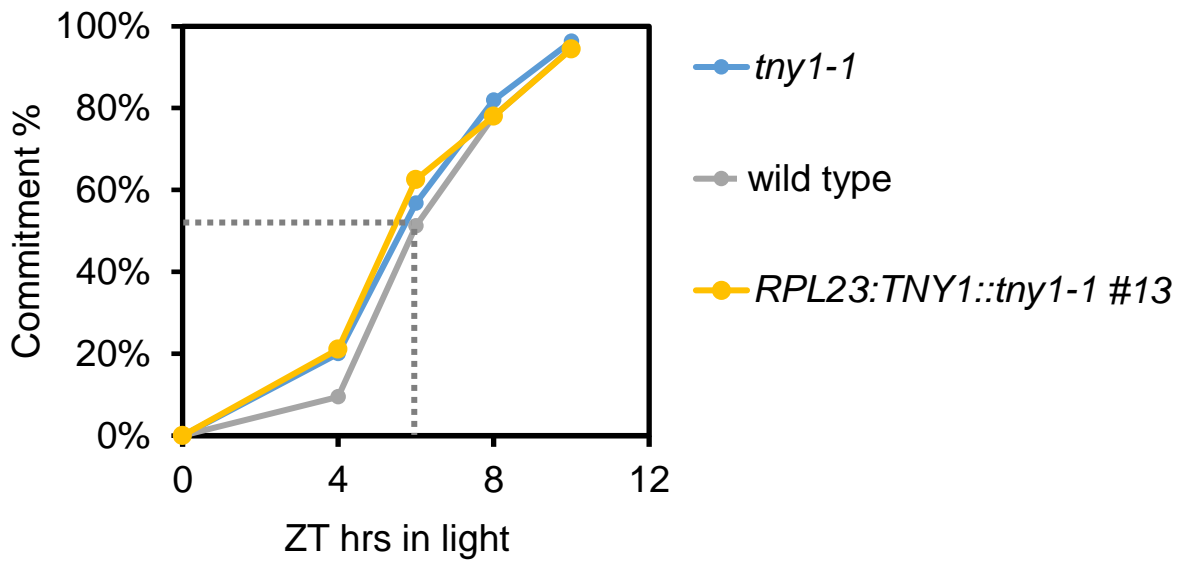

## Figure S6

Chlamydomonas

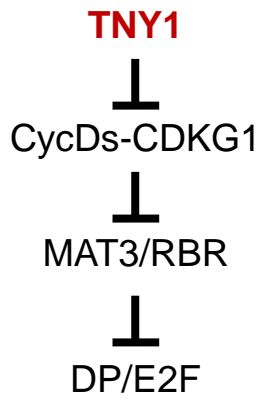

Arabidopsis

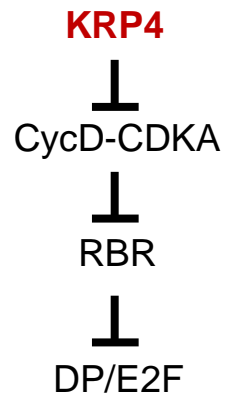

Mammalian cells

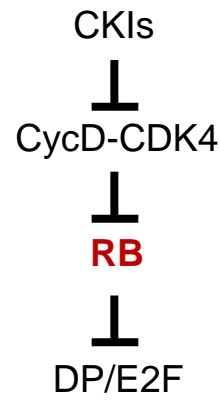

Budding yeast

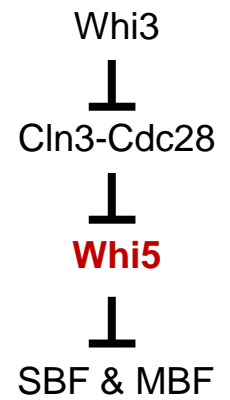



### Oligos for genotyping

| Name    | Sequence (5' to 3')        | Target gene   | PCR conditions<br>w/ hm Taq DNA<br>polymerase)              |
|---------|----------------------------|---------------|-------------------------------------------------------------|
| tny0    | CAACTGCAATCAATAGGCACG      | <i>TNY1</i>   | 96°C 3min; 96°C<br>10s-55°C 20s-<br>72°C 30s (39<br>cycles) |
| tny1-2  | CATGACCACCGCATCCTCTA       |               |                                                             |
| PS103-4 | GCTCCAGCTTTTGTTCCTTT       | <i>tny1-1</i> |                                                             |
| tny1-2  | CATGACCACCGCATCCTCTA       |               |                                                             |
| MTM3F   | CGACGACTTGGCATCGACAGGTGG   | <i>MTM</i>    |                                                             |
| MTM3R   | CTCGGCCAGAACCTTTCATAGGGTGG |               |                                                             |
| MTP2F   | GCTGGCATTCTGTATCCTTGACGC   | <i>MTP</i>    |                                                             |
| MTP2R   | GCGGCGTAACATAAAGGAGGGTCG   |               |                                                             |

### Oligos for qRT-PCR

| Name        | Sequence (5' to 3')    | Target gene  | qPCR conditions<br>(w/ Invitrogen Taq<br>DNA polymerase)    |
|-------------|------------------------|--------------|-------------------------------------------------------------|
| GBLP-3      | GTCATCCACTGCCTGTGCTTCT | <i>GBLP</i>  | 96°C 3min; 96°C<br>10s-62°C 10s-<br>72°C 30s (39<br>cycles) |
| GBLP-4      | GGCCTTCTTGCTGGTGATGTT  |              |                                                             |
| CDKG1 RT-3F | CGTGTGGTGACGCTGTACTA   | <i>CDKG1</i> |                                                             |
| CDKG1 RT-3R | GGAACAGAAGCCCGATCTC    |              |                                                             |
| TNY1 RT-6F  | CTGCCAATTTGCCAACCAA    | <i>TNY1</i>  |                                                             |
| TNY1 RT-6R  | GTTCCTGCGCTAATCCAT     |              |                                                             |

### Oligos to generate *RPL23:TNY1* misexpressing construct

| Name         | Sequence (5' to 3')            |
|--------------|--------------------------------|
| BamHI TNY1 F | GAGGGATCCATGCCAGATTTATGCAACATG |
| XhoI TNY1 R  | GCATCTCGAGCTAGCTGGACCAGCCGGGGG |

### Oligos to generate fluorescence protein-tagged *tny1* complementation constructs

| Name                    | Sequence (5' to 3')                                            |
|-------------------------|----------------------------------------------------------------|
| GFP-F-Spe-Sac-BamH      | GGGACTAGTGGGGAGCTCGGGGGATCC<br>ATGGCCAAGGGCGAGGAGCTGTTCA       |
| GFP-R-Xba-Xho-EcoR-NcoI | GGGCCATGGGAATTCGGGCTCGAGGGGTCTAGA<br>CTTGTACAGCTCGTCCATGCCGTGG |
| TNY1 pro-F-Sac-Spe      | GGGGAGCTCACTAGTAGCCATCGGTCCGTGCTTCC<br>TCCCA                   |
| TNY1 R-BamH             | GGGGGATCC<br>GCTGGACCAGCCGGGGGCTGGCGCTGTC                      |
| TNY1 ter-F-Xba          | GGGTCTAGATAGCTCATGCACCATGCATGACA<br>GCCGG                      |
| TNY1 ter-R-EcoR         | GGGAATTCGCTTGAAGATGAGACGGACTTCTG                               |
| BamH1 mCherry F         | CCAGCGGATCCATGGTGAGCAAGGGCGAG                                  |
| XbaI mCherry R          | ATGAGCTATCTAGACTACTTGTACAGCTCGTCC                              |

### Primers for genomic TNY1 cloning

| Name          | Sequence (5' to 3')              |
|---------------|----------------------------------|
| TNY KpnI      | CCGGTACCGCATTAAAGCACACCACACAG    |
| TNY NdeI      | CCCATATGACGGATGTATGCTTCAATGG     |
| TNY BglIII-F  | GCATGGTGCATAGATCTGCTGGACCAGCCGGG |
| TNY BglIII-Re | GGTCCAGCAGATCTATGCACCATGCATGACAG |
| HABglIII-F    | GGAGATCTTACCCATACGATGTTCCCTGAC   |
| HABglIII-F    | GGAGATCTTCAAGCGTAATCTGGAACGTCATA |

### Oligos for T7/CDGK1 transcripts

| Name | Sequence (5' to 3') |
|------|---------------------|
|------|---------------------|

### **31+29 CDKG1: 5UTR-CDS (No 3'UTR)**

oER0031 CdkG1 RNA T7  
UTR 5' A01 TAATACGACTCACTATAGGGTGAGTTCTTTACACTA  
GTGTTGGG

oER0029 CdkG1 RNA STOP TCACACGACGACGTCGTTGAAC

### **31+32 CDKG1**

oER0031 CdkG1 RNA T7 UTR 5'  
A01 TAATACGACTCACTATAGGGTGAGTTCTTTACACTA  
GTGTTGGG

oER0032 CdkG1 RNA UTR 3' A01 AACAGGGGCTTACAATCCTTGCATG

### **30+32 CDKG1 3'UTR**

oER0030 CdkG1 RNA T7 UTR 3' TAATACGACTCACTATAGGGGCGTGCTGCTTGCTCG  
CCTGCA

oER0032 CdkG1 RNA UTR 3' A01 AACAGGGGCTTACAATCCTTGCATG

### **Primers for TNY site directed mutagenesis**

oER0019 Tny1 mutagenesis  
primer F58A 5' GCCCTAGAGGCTTCGGCGCCGTGGTCTTCGAGAGC  
CCG

oER0020 Tny1 mutagenesis  
primer F58A 3' CGGGCTCTCGAAGACCACGGCGCCGAAGCCTCTAG  
GGC

oER0034 Tny1 mutagenesis  
primer F152A 5' GCGCGGCTTCGGCGCCGTGACCTTCGCAGAGG

oER0035 Tny1 mutagenesis  
primer F152A 3' CCTCTGCGAAGGTCACGGCGCCGAAGCCGCGC

### **Primers used for cDNA cloning**

oER0008 Tny1 Gateway  
primer forward CACCATGCCAGATTTATGCAACATGACAGACA

oER0009 Tny1 Gateway  
primer with STOP reverse CTAGCTGGACCAGCCGGGGGC
